# Supplementary material for: Switching the Post-translational Modification of Translation Elongation Factor EF-P
Source: PubMed Central journal article supplement (PMC6544042; doi:10.3389/fmicb.2019.01148), 2019-05-24
Supplement: Data_Sheet_4.pdf [file Data_Sheet_4.pdf]

## Supplementary Material

### 1 Supplementary Figures and Tables

#### 1.1 Supplementary Figures

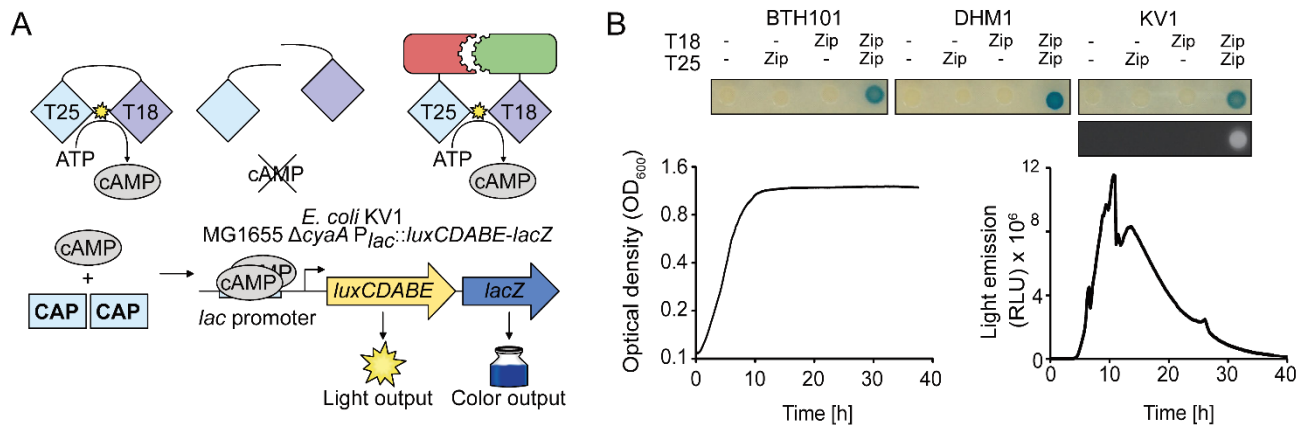

**Figure S1. (A)** Molecular principle of the Euromedex bacterial two-hybrid system with *E. coli* KV1 (adjusted from the Euromedex KIT Manual): The *Bordetella pertussis* adenylate cyclase CyaA apoprotein catalyzes the formation of cyclic AMP from ATP. Splitting the enzyme into two parts – T18 and T25 – renders CyaA inactive even upon co-expression. Fusing T18 and T25 to interacting proteins brings the fragments into close proximity and thus allows reconstitution of the Apo-CyaA. In *E. coli* KV1, the cyclic AMP dependent lac promoter precedes a translational fusion of the *lux*-operon and *lacZ*, allowing the indirect measurement of protein-protein interactions by light emission and colorimetric detection. **(B)** Proof of principle of *E. coli* KV1 as an *in vivo* reporter for protein-protein interaction using the self-interacting leucine zipper of GCN4. The colorimetric detection in *E. coli* KV1 cells was assessed semi quantitatively based on the formation of blue colonies on LB (Miller)-plates containing 40  $\mu\text{g}/\text{mL}$  X-Gal. *E. coli* KV1 light emission was measured in a time course experiment recording relative luminescence (RLU) and optical density at 600 nm ( $\text{OD}_{600}$ ) in time intervals of 10 minutes.

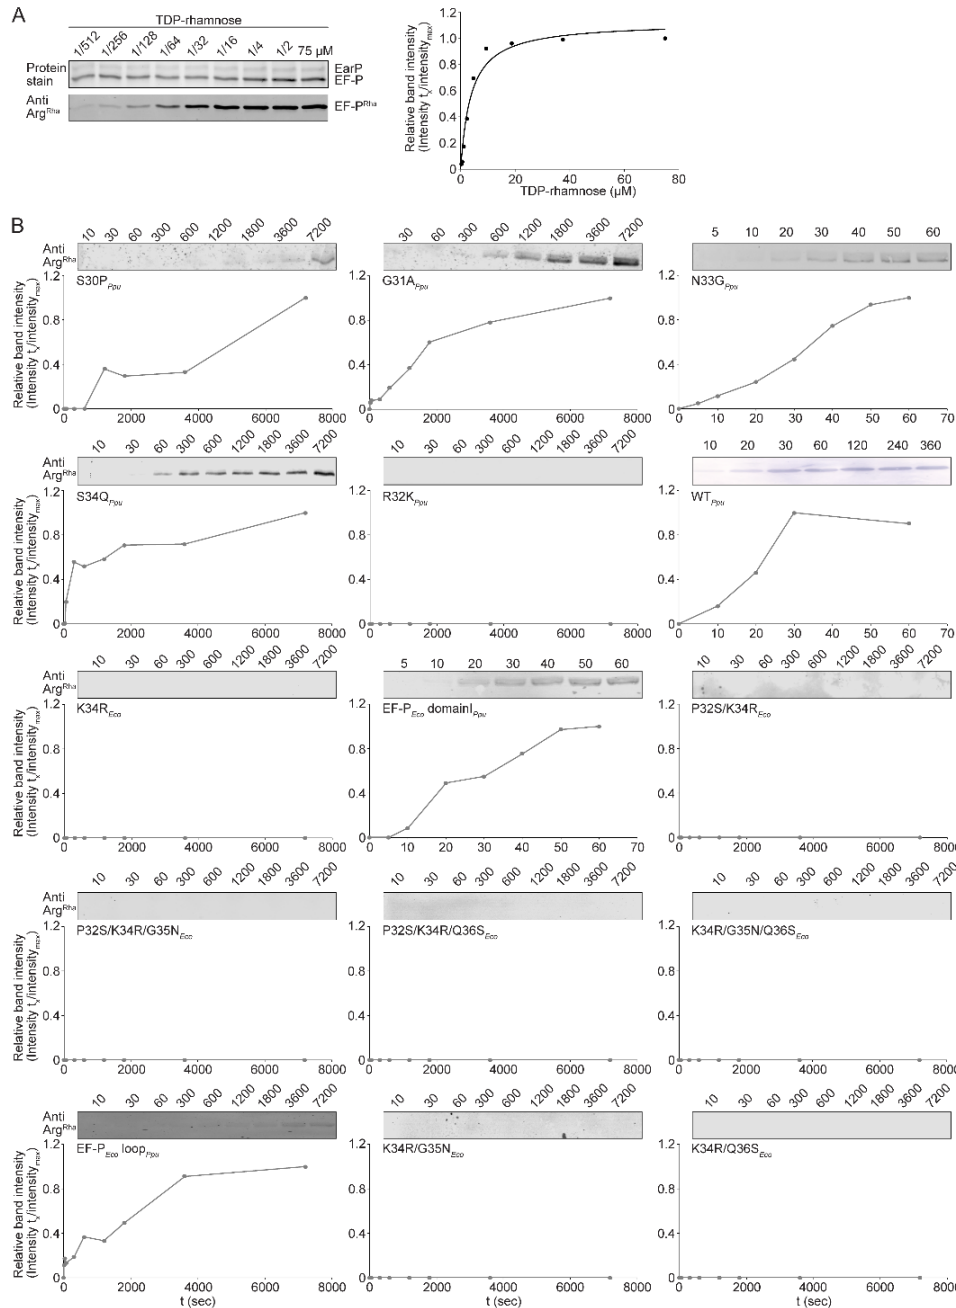

**Figure S2. (A)** Left: Analysis of EarP<sub>Ppu</sub> kinetic parameters. 0.5  $\mu\text{g}$  of EF-P<sub>Ppu</sub> and 0.05  $\mu\text{g}$  of EarP<sub>Ppu</sub> were subjected to SDS-PAGE after *in vitro* rhamnosylation (see Material and Methods) for 20 seconds at varying TDP-rhamnose concentrations. Proteins were transferred to nitrocellulose membrane by horizontal Western blotting. Rhamnosylated EF-P<sub>Ppu</sub> was detected using 0.25  $\mu\text{g}/\text{ml}$  of Anti-Arg<sup>Rha</sup>. Right: TDP-rhamnose saturation curve of EarP<sub>Ppu</sub>. Band intensities on nitrocellulose membrane were quantified using ImageJ and relative band intensities were plotted against TDP-rhamnose concentration. **(B)** Timecourse analysis of various EF-P<sub>Ppu</sub> and EF-P<sub>Eco</sub> variants. 0.5  $\mu\text{g}$  of EF-P<sub>Ppu</sub> and 0.05  $\mu\text{g}$  of EarP<sub>Ppu</sub> were subjected to SDS-PAGE after *in vitro* rhamnosylation at a TDP-rhamnose concentration of 50  $\mu\text{M}$  for varying timespans. Band intensities on nitrocellulose membrane were quantified using ImageJ and relative band intensities were plotted against time.

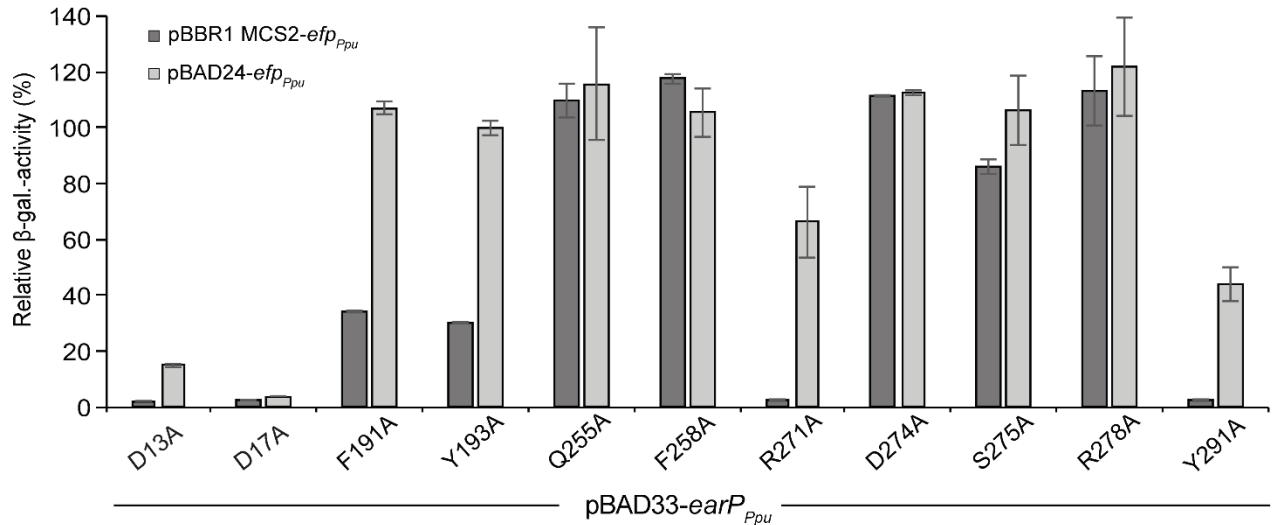

**Figure S3.**  $\beta$ -galactosidase activity in *E. coli* MG-CR-*efp*-Kan<sup>S</sup> upon expression (dark grey) or co-overexpression (light grey) of EF-P<sub>Ppu</sub> and EarP<sub>Ppu</sub> and single-amino-acid substitution variants. Cells were incubated under *cadBA*-inducing conditions (LB, pH 5.8) at 30°C o/n.

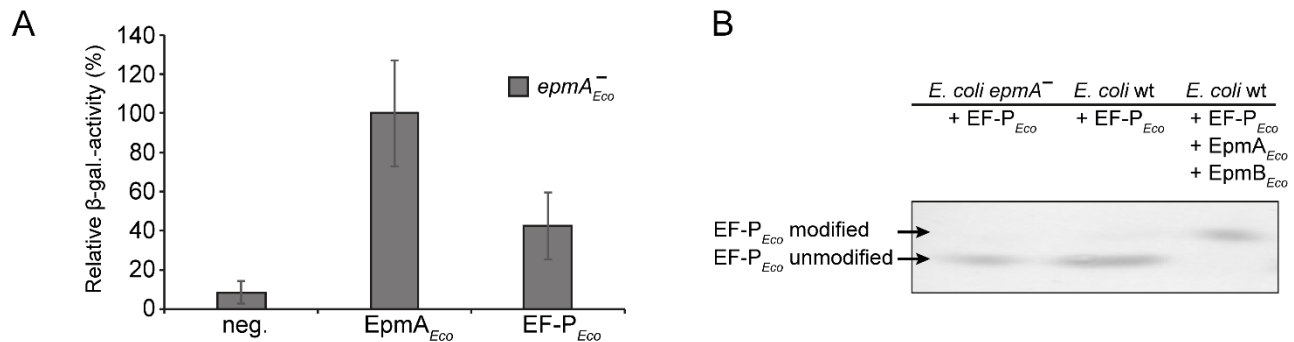

**Figure S4. (A)**  $\beta$ -galactosidase activity in the  $\Delta$ *epmA* reporter strain (*E. coli* MG-CL-12-*yjeA*) harboring either a plasmid borne copy of *epmA* (pBAD33-*epmA*) or *efp* (pBAD24-*efp*<sub>Eco</sub>). **(B)** Isoelectric focusing of *E. coli* EF-P, either overproduced in *E. coli epmA*<sup>-</sup> (BW25113-*epmA*), in which *epmA* was chromosomally deleted, or in *E. coli* wild type cells (BW25113). Furthermore, EF-P was overproduced in combination with its PTM proteins EpmA and EpmB in *E. coli* wild type (BW25113). Production of EF-P was verified by Western blot analysis.

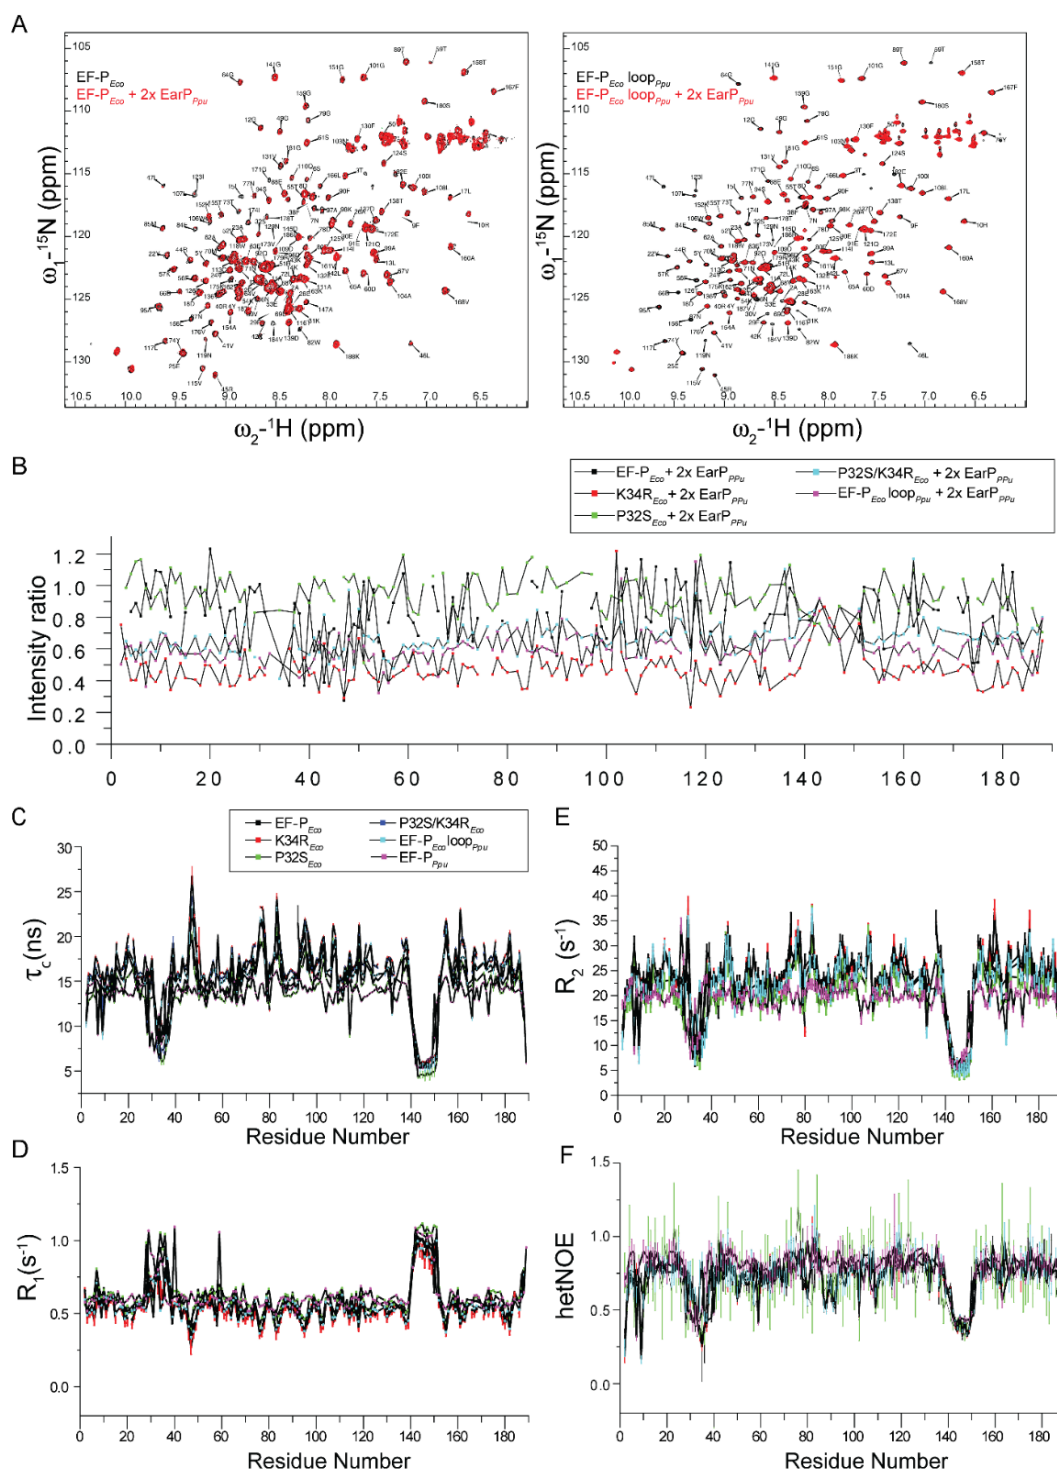

**Figure S5.** (A)  $^1\text{H}$ - $^{15}\text{N}$  HSQC titrations of EF-P<sub>Eco</sub> and EF-P<sub>Eco</sub> loop<sub>Ppu</sub> with EarP<sub>Ppu</sub> is shown along with the backbone assignments. Both proteins show a decrease in intensity upon titration with EarP<sub>Ppu</sub> indicating their interaction with EarP<sub>Ppu</sub>. (B) Intensity ratio of all the EF-P<sub>Eco</sub> mutants on titration with EarP<sub>Ppu</sub> is shown. (C) The correlation time ( $\tau_c$ ) for EF-P<sub>Eco</sub> and its variants along with (D)  $R_1$ , (E)  $R_2$  rates and (F) hetNOE are shown.

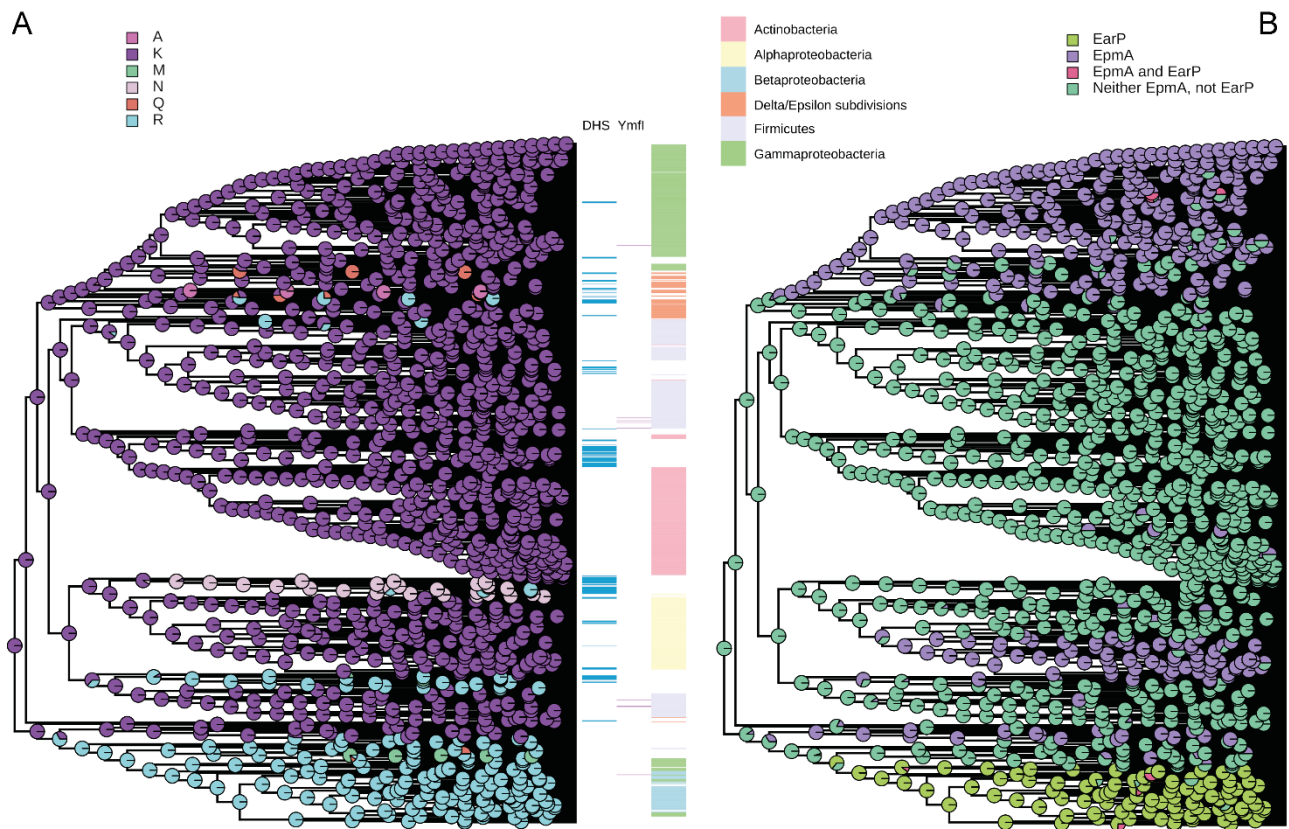

**Figure S6. (A)** Phylogenetic trees of the EF-P KOW-like N-domain I, with reconstructed state of the 34<sup>th</sup> position (A, left), presence of known modification systems and taxonomy (A, right colored bars). **(B)** Phylogenetic reconstruction of emergence of EF-P modification systems.

## 1.2 Supplementary Tables

Table S1. Strains used in this study

| Strain                       | Genotype                                                                                                                                                                                                   | Reference                   |
|------------------------------|------------------------------------------------------------------------------------------------------------------------------------------------------------------------------------------------------------|-----------------------------|
| DH5 $\alpha$ <i>pir</i>      | <i>recA1 endA1 gyrA96 thi-1 hsdR17 supE44 relA1</i><br>$\Delta$ <i>lacZYA-argF</i> U169 $\phi$ 80 <i>dlacZ</i> $\Delta$ M15 $\lambda$ <i>pir</i>                                                           | (Macinga et al., 1995)      |
| LMG194                       | F <sup>-</sup> $\Delta$ <i>lacX74 galE galK thi rpsL</i> $\Delta$ <i>phoA</i> (PvuII)<br>$\Delta$ <i>ara714 leu::Tn10</i>                                                                                  | (Guzman et al., 1995)       |
| BL21(DE3)                    | F <sup>-</sup> <i>ompT gal dcm lon hsdS<sub>B</sub></i> (rB <sup>-</sup> mB <sup>-</sup> ) $\lambda$ (DE3)                                                                                                 | (Studier and Moffatt, 1986) |
| DHM1                         | F <sup>-</sup> <i>cya-854 recA1 endA1 gyrA96 (NalR) thi1</i><br><i>hsdR17 spoT1 rfbD1 glnV44(AS)</i>                                                                                                       | (Karimova et al., 2005)     |
| BTH101                       | F <sup>-</sup> <i>cya-99 araD139 galE15 galK16 rpsL1 (StrR)</i><br><i>hsdR2 mcrA1 mcrB1</i> additional <i>relA1</i> mutation<br>reported by (Battesti and Bouveret, 2012)                                  | Euromedex                   |
| JW4107                       | $\Delta$ ( <i>araD-araB</i> )567, $\Delta$ <i>lacZ4787</i> (::rrnB-3), $\lambda^-$ , <i>rph-1</i> ,<br>$\Delta$ ( <i>rhaD-rhaB</i> )568, $\Delta$ <i>efp-772::kan</i> , <i>hsdR514</i>                     | (Baba et al., 2006)         |
| KV1                          | MG1655 <i>rpsL150</i> $\Delta$ <i>cyaA</i> P <sub><i>lac</i></sub> :: <i>luxCDABE-lacZ</i>                                                                                                                 | This study                  |
| LF1                          | MG1655 <i>rpsL150</i> P <sub><i>lac</i></sub> :: <i>rpsL-neo-kan::lacZ</i> $\Delta$ <sup>1-100</sup><br><i>bp;Kan<sup>R</sup> Strp<sup>S</sup></i>                                                         | (Fried et al., 2012)        |
| MG-CR- <i>efp</i>            | MG1655 $\Delta$ <i>lacZ::tet rpsL150 efp::npt</i> $\Delta$ <i>cadBA</i><br>P <sub><i>cadBA</i></sub> :: <i>lacZ</i>                                                                                        | (Lassak et al., 2015)       |
| MG-CR- <i>efp</i> -KanS      | MG1655 $\Delta$ <i>lacZ::tet rpsL150</i> $\Delta$ <i>efp</i> $\Delta$ <i>cadBA</i><br>P <sub><i>cadBA</i></sub> :: <i>lacZ</i>                                                                             | This study                  |
| MG-CR- <i>efp-epmA</i> -KanR | MG1655 $\Delta$ <i>lacZ::tet rpsL150</i> $\Delta$ <i>efp</i> $\Delta$ <i>cadBA</i><br><i>epmA::npt</i> P <sub><i>cadBA</i></sub> :: <i>lacZ</i>                                                            | This study                  |
| MG-CL-12- <i>yjeA</i>        | MG1655 $\Delta$ <i>lacZ::tet rpsL150 yjeA::npt</i> $\Delta$ <i>cadBA</i><br><i>cadBA::lacZ</i>                                                                                                             | (Ude, 2013)                 |
| BW25113                      | $\Delta$ ( <i>araD-araB</i> )567, $\Delta$ <i>lacZ4787</i> (::rrnB-3),<br>$\lambda^-$ , <i>rph-1</i> , $\Delta$ ( <i>rhaD-rhaB</i> )568, <i>hsdR514</i>                                                    | (Datsenko and Wanner, 2000) |
| BW25113- <i>epmA</i>         | $\Delta$ ( <i>araD-araB</i> )567, $\Delta$ <i>lacZ4787</i> (::rrnB-3),<br>$\lambda^-$ , <i>rph-1</i> , $\Delta$ ( <i>rhaD-rhaB</i> )568, <i>hsdR514</i> , $\Delta$ <i>epmA</i>                             | This study                  |
| JW4116                       | F <sup>-</sup> , $\Delta$ ( <i>araD-araB</i> )567, $\Delta$ <i>lacZ4787</i> (::rrnB-3), $\lambda^-$ ,<br><i>rph-1</i> , $\Delta$ ( <i>rhaD-rhaB</i> )568, $\Delta$ <i>poxA782::kan</i> ,<br><i>hsdR514</i> | (Baba et al., 2006)         |

Kan<sup>R</sup>: kanamycin resistance, Srep<sup>S</sup>: streptomycin sensitive

Table S2. Plasmids used in this study

| Plasmid                                                                                   | Features                                                                                                                                                                            | Reference               |
|-------------------------------------------------------------------------------------------|-------------------------------------------------------------------------------------------------------------------------------------------------------------------------------------|-------------------------|
| <b>Plasmids for strain construction</b>                                                   |                                                                                                                                                                                     |                         |
| pRED/ET <sup>®</sup> Amp                                                                  | λ-RED recombinase in pBAD24; Amp <sup>R</sup>                                                                                                                                       | GeneBridges, Germany    |
| FRT-PGK-gb2-neo-FRT template DNA                                                          | PCR-template (plasmid DNA) for generating a FRT-flanked PGK-gb2-neo cassette, Kan <sup>R</sup>                                                                                      | GeneBridges, Germany    |
| 709-FLPe, amp                                                                             | Plasmid for removal of FRT flanked resistance cassette, Supplier ID: A106                                                                                                           | GeneBridges, Germany    |
| pBAD/HisA-Lux                                                                             | Contains the <i>luxCDABE</i> operon from <i>Photorhabdus luminescens</i>                                                                                                            | (Volkwein et al., 2017) |
| <b>Plasmids for mutational analysis of the <i>E. coli</i> loop and for overproduction</b> |                                                                                                                                                                                     |                         |
| pBAD24                                                                                    | Amp <sup>R</sup> -cassette, pBBR322 origin, <i>araC</i> coding sequence, <i>ara</i> operator                                                                                        | (Guzman et al., 1995)   |
| pBAD24- <i>efp</i> <sub>Eco</sub>                                                         | C-terminal His <sub>6</sub> -tagged <i>E. coli efp</i> amplified from pBAD33- <i>efp</i> <sub>E.c.</sub> -His6 (Lassak et al., 2015) using P1/P2                                    | this study              |
| pBAD24- <i>efp</i> <sub>Eco</sub> P32G                                                    | C-terminal His <sub>6</sub> -tagged <i>E. coli efp</i> substitution variant P32G. Overlap PCR fragment was amplified from pBAD24- <i>efp</i> <sub>Eco</sub> using P1/P16 and P2/P15 | this study              |
| pBAD24- <i>efp</i> <sub>Eco</sub> P32S                                                    | C-terminal His <sub>6</sub> -tagged <i>E. coli efp</i> substitution variant P32S. Overlap PCR fragment was amplified from pBAD24- <i>efp</i> <sub>Eco</sub> using P1/P18 and P2/P17 | this study              |
| pBAD24- <i>efp</i> <sub>Eco</sub> G33A                                                    | C-terminal His <sub>6</sub> -tagged <i>E. coli efp</i> substitution variant G33A. Overlap PCR fragment was amplified from pBAD24- <i>efp</i> <sub>Eco</sub> using P1/P20 and P2/P19 | this study              |
| pBAD24- <i>efp</i> <sub>Eco</sub> G33S                                                    | C-terminal His <sub>6</sub> -tagged <i>E. coli efp</i> substitution variant G33S. Overlap PCR fragment was amplified from pBAD24- <i>efp</i> <sub>Eco</sub> using P1/P22 and P2/P21 | this study              |
| pBAD24- <i>efp</i> <sub>Eco</sub> K34A                                                    | C-terminal His <sub>6</sub> -tagged <i>E. coli efp</i> substitution variant K34A. Amplified from pBAD33- <i>efp</i> <sub>E.c.</sub> -His6-K34A (Lassak et al., 2015) using P1/P2    | this study              |
| pBAD24- <i>efp</i> <sub>Eco</sub> K34M                                                    | C-terminal His <sub>6</sub> -tagged <i>E. coli efp</i> substitution variant K34M. Overlap PCR fragment was amplified from pBAD24- <i>efp</i> <sub>Eco</sub> using P1/P24 and P2/P23 | this study              |

|                                                                                             |                                                                                                                                                                                       |            |
|---------------------------------------------------------------------------------------------|---------------------------------------------------------------------------------------------------------------------------------------------------------------------------------------|------------|
| pBAD24- <i>efp</i> <sub>Eco</sub><br>K34N                                                   | C-terminal His <sub>6</sub> -tagged <i>E. coli efp</i> substitution variant K34N. Overlap PCR fragment was amplified from pBAD24- <i>efp</i> <sub>Eco</sub> using P1/P26 and P2/P25   | this study |
| pBAD24- <i>efp</i> <sub>Eco</sub><br>K34Q                                                   | C-terminal His <sub>6</sub> -tagged <i>E. coli efp</i> substitution variant K34Q. Overlap PCR fragment was amplified from pBAD24- <i>efp</i> <sub>Eco</sub> using P1/P28 and P2/P27   | this study |
| pBAD24- <i>efp</i> <sub>Eco</sub><br>K34R                                                   | C-terminal His <sub>6</sub> -tagged <i>E. coli efp</i> substitution variant K34R. Amplified from pBAD33- <i>efp</i> <sub>E.c.</sub> -His6-K34R (Lassak et al., 2015) using P1/P2      | this study |
| pBAD24- <i>efp</i> <sub>Eco</sub><br>G35N                                                   | C-terminal His <sub>6</sub> -tagged <i>E. coli efp</i> substitution variant G35N. Overlap PCR fragment was amplified from pBAD24- <i>efp</i> <sub>Eco</sub> using P1/P30 and P2/P29   | this study |
| pBAD24- <i>efp</i> <sub>Eco</sub><br>Q36S                                                   | C-terminal His <sub>6</sub> -tagged <i>E. coli efp</i> substitution variant Q36S. Overlap PCR fragment was amplified from pBAD24- <i>efp</i> <sub>Eco</sub> using P1/P32 and P2/P31   | this study |
| <b>Plasmids for mutational analysis of the <i>P. putida</i> loop and for overproduction</b> |                                                                                                                                                                                       |            |
| pBAD24- <i>efp</i> <sub>Ppu</sub>                                                           | C-terminal His <sub>6</sub> -tagged <i>P. putida efp</i> amplified from <i>Pseudomonas putida</i> KT2440 using P1/P2                                                                  | this study |
| pBAD24- <i>efp</i> <sub>Ppu</sub><br>K29A                                                   | C-terminal His <sub>6</sub> -tagged <i>efp P. putida</i> substitution variant K29A. Overlap PCR fragment was amplified from pBAD24- <i>efp</i> <sub>Ppu</sub> using P1/P36 and P2/P35 | this study |
| pBAD24- <i>efp</i> <sub>Ppu</sub><br>K29R                                                   | C-terminal His <sub>6</sub> -tagged <i>P. putida efp</i> substitution variant K29R. Overlap PCR fragment was amplified from pBAD24- <i>efp</i> <sub>Ppu</sub> using P1/P37 and P2/P35 | this study |
| pBAD24- <i>efp</i> <sub>Ppu</sub><br>S30A                                                   | C-terminal His <sub>6</sub> -tagged <i>P. putida efp</i> substitution variant S30A. Overlap PCR fragment was amplified from pBAD24- <i>efp</i> <sub>Ppu</sub> using P1/P38 and P2/P35 | this study |
| pBAD24- <i>efp</i> <sub>Ppu</sub><br>S30G                                                   | C-terminal His <sub>6</sub> -tagged <i>P. putida efp</i> substitution variant S30G. Overlap PCR fragment was amplified from pBAD24- <i>efp</i> <sub>Ppu</sub> using P1/P39 and P2/P35 | this study |
| pBAD24- <i>efp</i> <sub>Ppu</sub><br>S30P                                                   | C-terminal His <sub>6</sub> -tagged <i>P. putida efp</i> substitution variant S30P. Overlap PCR fragment was amplified from pBAD24- <i>efp</i> <sub>Ppu</sub> using P1/P40 and P2/P35 | this study |



|                                           |                                                                                                                                                                                       |                         |
|-------------------------------------------|---------------------------------------------------------------------------------------------------------------------------------------------------------------------------------------|-------------------------|
| pBAD24- <i>efp</i> <sub>Ppu</sub><br>G31A | C-terminal His <sub>6</sub> -tagged <i>P. putida efp</i> substitution variant G31A. Overlap PCR fragment was amplified from pBAD24- <i>efp</i> <sub>Ppu</sub> using P1/P41 and P2/P35 | this study              |
| pBAD24- <i>efp</i> <sub>Ppu</sub><br>G31S | C-terminal His <sub>6</sub> -tagged <i>P. putida efp</i> substitution variant G31S. Overlap PCR fragment was amplified from pBAD24- <i>efp</i> <sub>Ppu</sub> using P1/P42 and P2/P35 | this study              |
| pBAD24- <i>efp</i> <sub>Ppu</sub><br>R32K | C-terminal His <sub>6</sub> -tagged <i>P. putida efp</i> substitution variant R32K. Overlap PCR fragment was amplified from pBAD24- <i>efp</i> <sub>Ppu</sub> using P1/P44 and P2/P43 | this study              |
| pBAD24- <i>efp</i> <sub>Ppu</sub><br>N33D | C-terminal His <sub>6</sub> -tagged <i>P. putida efp</i> substitution variant N33D. Overlap PCR fragment was amplified from pBAD24- <i>efp</i> <sub>Ppu</sub> using P1/P46 and P2/P45 | this study              |
| pBAD24- <i>efp</i> <sub>Ppu</sub><br>N33G | C-terminal His <sub>6</sub> -tagged <i>P. putida efp</i> substitution variant N33G. Overlap PCR fragment was amplified from pBAD24- <i>efp</i> <sub>Ppu</sub> using P1/P47 and P2/P45 | this study              |
| pBAD24- <i>efp</i> <sub>Ppu</sub><br>S34A | C-terminal His <sub>6</sub> -tagged <i>P. putida efp</i> substitution variant S34A. Overlap PCR fragment was amplified from pBAD24- <i>efp</i> <sub>Ppu</sub> using P1/P48 and P2/P45 | this study              |
| pBAD24- <i>efp</i> <sub>Ppu</sub><br>S34Q | C-terminal His <sub>6</sub> -tagged <i>P. putida efp</i> substitution variant S34Q. Overlap PCR fragment was amplified from pBAD24- <i>efp</i> <sub>Ppu</sub> using P1/P49 and P2/P45 | this study              |
| pBAD24- <i>efp</i> <sub>Ppu</sub><br>A35S | C-terminal His <sub>6</sub> -tagged <i>P. putida efp</i> substitution variant A35S. Overlap PCR fragment was amplified from pBAD24- <i>efp</i> <sub>Ppu</sub> using P1/P50 and P2/P45 | this study              |
| pBAD33                                    | Cm <sup>R</sup> -cassette, p15A origin, <i>araC</i> coding sequence, <i>ara</i> operator                                                                                              | (Guzman et al., 1995)   |
| pBAD33 PP1857-<br>His6                    | C-terminal His6-Tag <i>earP</i> version from <i>P. putida</i> KT2440                                                                                                                  | (Krafczyk et al., 2017) |

| <b>Plasmids for cross modification/actication and overproduction</b> |                                                                                                                                                                                                                                                                                                                           |                       |
|----------------------------------------------------------------------|---------------------------------------------------------------------------------------------------------------------------------------------------------------------------------------------------------------------------------------------------------------------------------------------------------------------------|-----------------------|
| pBBRMCS2                                                             | pBBR origin of replication, <i>oriT</i> , KanR                                                                                                                                                                                                                                                                            | (Kovach et al., 1995) |
| pBAD24- <i>efp</i> <sub>Eco</sub> domainI- <i>efp</i> <sub>Ppu</sub> | C-terminal His <sub>6</sub> -tagged <i>E. coli efp</i> where the first 65 amino acids (domainI) were substituted by the first 65 amino acids from <i>P. putida efp</i> . Overlap PCR fragment was amplified from pBAD24- <i>efp</i> <sub>Ppu</sub> using P1/P52 and pBAD24- <i>efp</i> <sub>Eco</sub> P2/P51              | this study            |
| pBAD24- <i>efp</i> <sub>Eco</sub> loop- <i>efp</i> <sub>Ppu</sub>    | C-terminal His <sub>6</sub> -tagged <i>E. coli efp</i> P32S K34R G35N Q36S multiple amino acid substitution variant, corresponding to EF-P of <i>E. coli</i> carrying the acceptor loop of EF-P from <i>P. putida</i> . Overlap PCR fragment was amplified from pBAD24- <i>efp</i> <sub>Eco</sub> using P1/P54 and P2/P53 | this study            |
| pBAD24- <i>efp</i> <sub>Eco</sub> P32S K34R                          | C-terminal His <sub>6</sub> -tagged <i>E. coli efp</i> substitution variant P32S K34R. Overlap PCR fragment was amplified from pBAD24- <i>efp</i> <sub>Eco</sub> K34R using P1/P56 and P2/P55                                                                                                                             | this study            |
| pBAD24- <i>efp</i> <sub>Eco</sub> K34R G35N                          | C-terminal His <sub>6</sub> -tagged <i>E. coli efp</i> substitution variant K34R G35N. Overlap PCR fragment was amplified from pBAD24- <i>efp</i> <sub>Eco</sub> K34R using P1/P58 and P2/P57                                                                                                                             | this study            |
| pBAD24- <i>efp</i> <sub>Eco</sub> K34R Q36S                          | C-terminal His <sub>6</sub> -tagged <i>E. coli efp</i> substitution variant K34R Q36S. Overlap PCR fragment was amplified from pBAD24- <i>efp</i> <sub>Eco</sub> K34R using P1/P60 and P2/P59                                                                                                                             | this study            |
| pBAD24- <i>efp</i> <sub>Eco</sub> P32S K34R G35N                     | C-terminal His <sub>6</sub> -tagged <i>E. coli efp</i> substitution variant P32S K34R G35N. Overlap PCR fragment was amplified from pBAD24- <i>efp</i> <sub>Eco</sub> P32S K34R using P1/P62 and P2/P61                                                                                                                   | this study            |
| pBAD24 - <i>efp</i> <sub>Eco</sub> P32S K34R Q36S                    | C-terminal His <sub>6</sub> -tagged <i>E. coli efp</i> substitution variant P32S K34R Q36S. Overlap PCR fragment was amplified from pBAD24- <i>efp</i> <sub>Eco</sub> P32S K34R using P1/P64 and P2/P63                                                                                                                   | this study            |
| pBAD24- <i>efp</i> <sub>Eco</sub> K34R G35N Q36S                     | C-terminal His <sub>6</sub> -tagged <i>E. coli efp</i> substitution variant K34R G35N Q36S. Overlap PCR fragment was amplified from pBAD24- <i>efp</i> <sub>Eco</sub> K34R using P1/P66 and P2/P65                                                                                                                        | this study            |

|                                                           |                                                                                                                                                                                                                                        |                         |
|-----------------------------------------------------------|----------------------------------------------------------------------------------------------------------------------------------------------------------------------------------------------------------------------------------------|-------------------------|
| pBAD33- <i>earP<sub>So</sub></i>                          | <i>earP</i> from <i>Shewanella oneidensis</i> MR-1 amplified from pBAD24- <i>earP<sub>So</sub></i> -His <sub>6</sub> (Lassak et al., 2015) using P1/P67                                                                                | this study              |
| <b>Plasmids for XPPX assay</b>                            |                                                                                                                                                                                                                                        |                         |
| p3LC-TL30-APP                                             | p3LC-TL30 + sequence encoding Ala-Pro-Pro                                                                                                                                                                                              | (Peil et al., 2013)     |
| p3LC-TL30-PPD                                             | p3LC-TL30 + sequence encoding Pro-Pro-Asp                                                                                                                                                                                              | (Peil et al., 2013)     |
| p3LC-TL30-PPP                                             | p3LC-TL30 + sequence encoding Pro-Pro-Pro                                                                                                                                                                                              | (Ude et al., 2013)      |
| p3LC-TL30-DPP                                             | p3LC-TL30 + sequence encoding Asp-Pro-Pro                                                                                                                                                                                              | (Peil et al., 2013)     |
| p3LC-TL30-PPG                                             | p3LC-TL30 + sequence encoding Pro-Pro-Gly                                                                                                                                                                                              | (Peil et al., 2013)     |
| p3LC-TL30-PPN                                             | p3LC-TL30 + sequence encoding Pro-Pro-Asn                                                                                                                                                                                              | (Peil et al., 2013)     |
| <b>Plasmids used in the reporter strain MG-CL-12-yjeA</b> |                                                                                                                                                                                                                                        |                         |
| pBAD33- <i>epmA</i>                                       | <i>epmA</i> from <i>E. coli</i> , amplified using P72/P75                                                                                                                                                                              | this study              |
| <b>Plasmids for protein overproduction (NMR)</b>          |                                                                                                                                                                                                                                        |                         |
| pET SUMO                                                  | pBR322 origin, <i>lacI</i> , T7 <i>lac</i> promoter, N-terminal His <sub>6</sub> tag, SUMO coding sequence, Kan <sup>R</sup> , Supplier ID: K300-01                                                                                    | Invitrogen              |
| pET SUMO- <i>efp<sub>Eco</sub></i>                        | C-terminal genetic fusion of <i>efp</i> from <i>E. coli</i> to His <sub>6</sub> -SUMO-tag. Amplified from pBAD24- <i>efp<sub>Eco</sub></i> using P68/P69                                                                               | this study              |
| pET SUMO- <i>efp<sub>Ppu</sub></i>                        | C-terminal genetic fusion of <i>efp</i> from <i>P. putida</i> KT2440 to His <sub>6</sub> -SUMO-tag                                                                                                                                     | (Krafczyk et al., 2017) |
| pET SUMO- <i>efp<sub>Eco</sub></i> P32S                   | C-terminal genetic fusion of <i>efp</i> from <i>E. coli</i> substitution variant P32S to His <sub>6</sub> -SUMO-tag. Overlap PCR fragment was amplified from pET SUMO- <i>efp<sub>Eco</sub></i> using P5/P18 and P6/P17                | this study              |
| pET SUMO- <i>efp<sub>Eco</sub></i> K34R                   | C-terminal genetic fusion of <i>efp</i> from <i>E. coli</i> substitution variant K34R to His <sub>6</sub> -SUMO-tag. Overlap PCR fragment was amplified from pET SUMO- <i>efp<sub>Eco</sub></i> using P5/P71 and P6/P70                | this study              |
| pET SUMO- <i>efp<sub>Eco</sub></i> P32S K34R              | C-terminal genetic fusion of <i>efp</i> from <i>E. coli</i> substitution variant P32S K34R to His <sub>6</sub> -SUMO-tag. Overlap PCR fragment was amplified from pET SUMO- <i>efp<sub>Eco</sub></i> using P5/P56 and P6/P55           | this study              |
| pET SUMO- <i>efp<sub>Eco</sub></i> loop <sup>Ppu</sup>    | C-terminal genetic fusion of <i>efp</i> from <i>E. coli</i> substitution variant P32S K34R G35N Q36S to His <sub>6</sub> -SUMO-tag. Overlap PCR fragment was amplified from pET SUMO- <i>efp<sub>Eco</sub></i> using P5/P54 and P6/P53 | this study              |

| <b>Plasmids for bacterial two-hybrid (BTH)</b>        |                                                                                                                                                                                                                                                                                                                                                           |                         |
|-------------------------------------------------------|-----------------------------------------------------------------------------------------------------------------------------------------------------------------------------------------------------------------------------------------------------------------------------------------------------------------------------------------------------------|-------------------------|
| pUT18- <i>zip</i>                                     | N-terminal genetic fusion of the leucine zipper from GCN4 to the T18 fragment of CyaA                                                                                                                                                                                                                                                                     | Euromedex               |
| pKT25- <i>zip</i>                                     | C-terminal genetic fusion of the leucine zipper from GCN4 to the T25 fragment of CyaA                                                                                                                                                                                                                                                                     | Euromedex               |
| pUT18C-PP1858                                         | C-terminal genetic fusion of <i>efp</i> from <i>Pseudomonas putida</i> to the T18 fragment of CyaA                                                                                                                                                                                                                                                        | (Krafczyk et al., 2017) |
| pKT25-PP1857                                          | C-terminal genetic fusion of <i>earP</i> from <i>Pseudomonas putida</i> to the T25 fragment of CyaA                                                                                                                                                                                                                                                       | (Krafczyk et al., 2017) |
| pUT18C- <i>efp</i> <sub>Eco</sub>                     | C-terminal genetic fusion of <i>efp</i> from <i>Escherichia coli</i> to the T18 fragment of CyaA. PCR fragment was amplified from pBAD24- <i>efp</i> <sub>Eco</sub> using P80/P81                                                                                                                                                                         | this study              |
| pUT18C- <i>efp</i> <sub>Eco</sub> K34R                | C-terminal genetic fusion of <i>efp</i> from <i>Escherichia coli</i> to the T18 fragment of CyaA. K34R single amino acid exchange variant. PCR fragment was amplified from pBAD24- <i>efp</i> <sub>Eco</sub> K34R using P80/P81                                                                                                                           | this study              |
| pUT18C- <i>efp</i> <sub>Eco</sub> P32S K34R           | C-terminal genetic fusion of <i>efp</i> from <i>Escherichia coli</i> to the T18 fragment of CyaA. P32S K34R double amino acid exchange variant. PCR fragment was amplified from pBAD24- <i>efp</i> <sub>Eco</sub> P32S K34R using P80/P81                                                                                                                 | this study              |
| pUT18C- <i>efp</i> <sub>Eco</sub> loop <sub>Ppu</sub> | C-terminal genetic fusion of <i>efp</i> from <i>E. coli</i> to the T18 fragment of CyaA. P32S K34R G35N Q36S multiple amino acid exchange variant, corresponding to EF-P of <i>E. coli</i> carrying the acceptor loop of EF-P from <i>P. putida</i> . PCR fragment was amplified from pBAD24- <i>efp</i> <sub>Eco</sub> loop <sub>Ppu</sub> using P80/P81 | this study              |
| <b>Plasmids for isoelectric focusing</b>              |                                                                                                                                                                                                                                                                                                                                                           |                         |
| pBAD33- <i>efp</i> -His <sub>6</sub>                  | C-terminal His <sub>6</sub> -Tag <i>efp</i> version from <i>E. coli</i> into pBAD33                                                                                                                                                                                                                                                                       | (Lassak et al., 2015)   |
| pBAD33- <i>efp</i> -His <sub>6</sub> - <i>epmAB</i>   | C-terminal His <sub>6</sub> -tagged <i>efp</i> and <i>epmAB</i> from <i>E. coli</i> . Overlap PCR fragment was amplified using P73/P76, P72/P75 and P74/P77                                                                                                                                                                                               | this study              |

| <b>Plasmids for EarP mutant test</b> |                                                                                                                                                          |                         |
|--------------------------------------|----------------------------------------------------------------------------------------------------------------------------------------------------------|-------------------------|
| pBBR1-MCS2<br>NP_SO_PP1858-<br>His6  | C-terminal His6-Tag <i>efp</i> from <i>Pseudomonas putida</i> under control of the <i>Shewanella oneidensis</i> native <i>efp</i> promoter in pBBR1-MCS2 | (Krafczyk et al., 2017) |
| pBAD33 PP1857<br>D13A-His6           | C-terminal His6-Tag <i>earP</i> from <i>Pseudomonas putida</i> in pBAD33. Mutant version; Asp13 exchanged to Ala                                         | (Krafczyk et al., 2017) |
| pBAD33 PP1857<br>D17A-His6           | C-terminal His6-Tag <i>earP</i> from <i>Pseudomonas putida</i> in pBAD33. Mutant version; Asp17 exchanged to Ala                                         | (Krafczyk et al., 2017) |
| pBAD33 PP1857<br>F191A-His6          | C-terminal His6-Tag <i>earP</i> from <i>Pseudomonas putida</i> in pBAD33. Mutant version; Phe191 exchanged to Ala                                        | (Krafczyk et al., 2017) |
| pBAD33 PP1857<br>Y193A-His6          | C-terminal His6-Tag <i>earP</i> from <i>Pseudomonas putida</i> in pBAD33. Mutant version; Tyr193 exchanged to Ala                                        | (Krafczyk et al., 2017) |
| pBAD33 PP1857<br>Q255A-His6          | C-terminal His6-Tag <i>earP</i> from <i>Pseudomonas putida</i> in pBAD33. Mutant version; Gln255 exchanged to Ala                                        | (Krafczyk et al., 2017) |
| pBAD33 PP1857<br>F258A-His6          | C-terminal His6-Tag <i>earP</i> from <i>Pseudomonas putida</i> in pBAD33. Mutant version; Phe258 exchanged to Ala                                        | (Krafczyk et al., 2017) |
| pBAD33 PP1857<br>R271A-His6          | C-terminal His6-Tag <i>earP</i> from <i>Pseudomonas putida</i> in pBAD33. Mutant version; Arg271 exchanged to Ala                                        | (Krafczyk et al., 2017) |
| pBAD33 PP1857<br>D274A-His6          | C-terminal His6-Tag <i>earP</i> from <i>Pseudomonas putida</i> in pBAD33. Mutant version; Asp274 exchanged to Ala                                        | (Krafczyk et al., 2017) |
| pBAD33 PP1857<br>S275A-His6          | C-terminal His6-Tag <i>earP</i> from <i>Pseudomonas putida</i> in pBAD33. Mutant version; Ser275 exchanged to Ala                                        | (Krafczyk et al., 2017) |
| pBAD33 PP1857<br>R278A-His6          | C-terminal His6-Tag <i>earP</i> from <i>Pseudomonas putida</i> in pBAD33. Mutant version; Arg278 exchanged to Ala                                        | (Krafczyk et al., 2017) |
| pBAD33 PP1857<br>Y291A-His6          | C-terminal His6-Tag <i>earP</i> from <i>Pseudomonas putida</i> in pBAD33. Mutant version; Tyr291 exchanged to Ala                                        | (Krafczyk et al., 2017) |

Amp<sup>R</sup>, Cm<sup>R</sup>, Kan<sup>R</sup>: ampicillin, chloramphenicol, kanamycin resistance.

Table S3. Primers used in this study

| Identifier                                    | Oligonucleotide                        | Sequence (5' - 3')                                                                                       | Restriction site | Reference             |
|-----------------------------------------------|----------------------------------------|----------------------------------------------------------------------------------------------------------|------------------|-----------------------|
| <b>Primers for sequencing and cloning</b>     |                                        |                                                                                                          |                  |                       |
| P1                                            | Seq33 fw                               | GGC GTC CAC ACT TTG CTA<br>TGC                                                                           |                  | (Lassak et al., 2010) |
| P2                                            | pBAD HisA rev                          | CAG TTC CCT ACT CTC GCA<br>TG                                                                            |                  | (Lassak et al., 2010) |
| P3                                            | <i>epmA</i> chk fw                     | TAG GTA CAA CAG TAT AGT<br>CTG ATG GAT AA                                                                |                  | this study            |
| P4                                            | <i>epmA</i> chk rev                    | TGA GGC ATG AAA CCA TCC<br>TTC ATT TC                                                                    |                  | this study            |
| P5                                            | T7 Prom                                | TAA TAC GAC TCA CTA TAG G                                                                                |                  |                       |
| P6                                            | T7 Term                                | TAT GCT AGT TAT TGC TCA G                                                                                |                  |                       |
| <b>Primers for strain construction of KV1</b> |                                        |                                                                                                          |                  |                       |
| P7                                            | <i>lacI</i> -583-fw                    | GTC TGC GTC TGG CTG GCT<br>GGC ATA                                                                       |                  | (Fried et al., 2012)  |
| P8                                            | <i>luxC</i> -OL-rev                    | TAG TGC CCA TAG CTG TTT<br>CCT GTG TGA AAT TGT TAT<br>CC                                                 |                  | this study            |
| P9                                            | <i>luxC</i> -OL-fw                     | GGA AAC AGC TAT GGG CAC<br>TAA AAA AAT TTC ATT CAT<br>TAT TAA CGG                                        |                  | this study            |
| P10                                           | <i>luxE</i> -OL-sRBS- <i>lacZ</i> -rev | AAT GTA CCT CCT TAC TTT<br>ATT TAT TGT ATT TGT TTA<br>GCT ATC AAA CGC TTC GGT<br>TAA GCT C               |                  | this study            |
| P11                                           | OL-sRBS- <i>lacZ</i> -fw               | ACA AAT ACA ATA AAT AAA<br>GTA AGG AGG TAC ATT ATG<br>ACC ATG ATT ACG GAT TCA<br>CTG GCC G               |                  | this study            |
| P12                                           | <i>lacZ</i> 500bp anti                 | CGA CTG TCC TGG CCG TAA<br>CCG ACC                                                                       |                  | (Fried et al., 2012)  |
| P13                                           | delta <i>cyaA</i> fw                   | GTT GGC GGA ATC ACA GTC<br>ATG ACG GGT AGC AAA TCA<br>GGC GAT ACG TCT TGA ATT<br>AAC CCT CAC TAA AGG GCG |                  | this study            |

|                                                                           |                         |                                                                                                            |  |            |
|---------------------------------------------------------------------------|-------------------------|------------------------------------------------------------------------------------------------------------|--|------------|
| P14                                                                       | delta <i>cyaA</i> rev   | TCC GCT AAG ATT GCA TGC<br>CGG ATA AGC CTC GCT TTC<br>CGG CAC GTT CAT CAT AAT<br>ACG ACT CAC TAT AGG GCT C |  | this study |
| <b>Primers <i>E. coli</i> loop mutation and overproduction constructs</b> |                         |                                                                                                            |  |            |
| P15                                                                       | <i>efp Eco</i> P32G fw  | GTA AAA GGC GGT AAA GGC<br>CAG G                                                                           |  | this study |
| P16                                                                       | <i>efp Eco</i> P32G rev | CCT GGC CTT TAC CGC CTT<br>TTA C                                                                           |  | this study |
| P17                                                                       | <i>efp Eco</i> P32S fw  | CGT AAA ATC GGG TAA AGG<br>CCA GG                                                                          |  | this study |
| P18                                                                       | <i>efp Eco</i> P32S rev | CCT GGC CTT TAC CCG ATT<br>TTA CG                                                                          |  | this study |
| P19                                                                       | <i>efp Eco</i> G33A fw  | TAA AAC CGG CGA AAG GCC<br>AGG                                                                             |  | this study |
| P20                                                                       | <i>efp Eco</i> G33A rev | CCT GGC CTT TCG CCG GTT<br>TTA                                                                             |  | this study |
| P21                                                                       | <i>efp Eco</i> G33S fw  | GTA AAA CCG TCG AAA GGC<br>CAG G                                                                           |  | this study |
| P22                                                                       | <i>efp Eco</i> G33S rev | CCT GGC CTT TCG ACG GTT<br>TTA C                                                                           |  | this study |
| P23                                                                       | <i>efp Eco</i> K34M fw  | GTA AAA CCG GGT ATG GGC<br>CAG GCA TTT                                                                     |  | this study |
| P24                                                                       | <i>efp Eco</i> K34M rev | AAA TGC CTG GCC CAT ACC<br>CGG TTT TAC                                                                     |  | this study |
| P25                                                                       | <i>efp Eco</i> K34N fw  | GTA AAA CCG GGT AAC GGC<br>CAG GCA TTT                                                                     |  | this study |
| P26                                                                       | <i>efp Eco</i> K34N rev | AAA TGC CTG GCC GTT ACC<br>CGG TTT TAC                                                                     |  | this study |
| P27                                                                       | <i>efp Eco</i> K34Q fw  | GTA AAA CCG GGT CAG GGC<br>CAG GCA TTT                                                                     |  | this study |
| P28                                                                       | <i>efp Eco</i> K34Q rev | AAA TGC CTG GCC CTG ACC<br>CGG TTT TAC                                                                     |  | this study |
| P29                                                                       | <i>efp Eco</i> G35N fw  | CCG GGT AAA AAC CAG GCA<br>TTT GC                                                                          |  | this study |
| P30                                                                       | <i>efp Eco</i> G35N rev | GCA AAT GCC TGG TTT TTA<br>CCC GG                                                                          |  | this study |
| P31                                                                       | <i>efp Eco</i> Q36S fw  | GGG TAA AGG CAG CGC ATT<br>TGC                                                                             |  | this study |

|                                                                             |                                  |                                                                                     |             |            |
|-----------------------------------------------------------------------------|----------------------------------|-------------------------------------------------------------------------------------|-------------|------------|
| P32                                                                         | <i>efp Eco</i> Q36S<br>rev       | GCA AAT GCG CTG CCT TTA<br>CCC                                                      |             | this study |
| <b>Primers <i>P. putida</i> loop mutation and overproduction constructs</b> |                                  |                                                                                     |             |            |
| P33                                                                         | NheI-NRBS-<br>PP_1858-fw         | GCA CTA GCT AGC CGC GGC<br>CTC GAT TTT TAT AAA TCC                                  | <i>NheI</i> | this study |
| P34                                                                         | XbaI-PP_1858-<br>GS-His6-rev     | CGT CTA GAT TAG TGA TGG<br>TGA TGG TGA TGC GAG CCC<br>TTC TTG GAG CGG CCT TTG<br>AA | <i>XbaI</i> | this study |
| P35                                                                         | <i>efp Ppu</i> 29 30 31<br>OL fw | CGT AAC AGC GCG ATC ATG<br>AAG ACC                                                  |             | this study |
| P36                                                                         | <i>efp Ppu</i> K29A<br>OL rev    | CAT GAT CGC GCT GTT ACG<br>GCC CGA CGC GGT GAA CTC<br>AGC                           |             | this study |
| P37                                                                         | <i>efp Ppu</i> K29R<br>OL rev    | CAT GAT CGC GCT GTT ACG<br>GCC CGA GCG GGT GAA CTC<br>AGC                           |             | this study |
| P38                                                                         | <i>efp Ppu</i> S30A<br>OL rev    | CAT GAT CGC GCT GTT ACG<br>GCC CGC CTT GGT GAA CTC<br>AGC                           |             | this study |
| P39                                                                         | <i>efp Ppu</i> S30G<br>OL rev    | CAT GAT CGC GCT GTT ACG<br>GCC GCC CTT GGT GAA CTC<br>AGC                           |             | this study |
| P40                                                                         | <i>efp Ppu</i> S30P<br>OL rev    | CAT GAT CGC GCT GTT ACG<br>GCC CGG CTT GGT GAA CTC<br>AGC                           |             | this study |
| P41                                                                         | <i>efp Ppu</i> G31A<br>OL rev    | CAT GAT CGC GCT GTT ACG<br>CGC CGA CTT GGT GAA CTC                                  |             | this study |
| P42                                                                         | <i>efp Ppu</i> G31S<br>OL rev    | CAT GAT CGC GCT GTT ACG<br>GCT CGA CTT GGT GAA CTC                                  |             | this study |
| P43                                                                         | <i>efp Ppu</i> R32K<br>fw        | ACC AAG TCG GGC AAG AAC<br>AGC GCG ATC                                              |             | this study |
| P44                                                                         | <i>efp Ppu</i> R32K<br>rev       | GAT CGC GCT GTT CTT GCC<br>CGA CTT GGT                                              |             | this study |
| P45                                                                         | <i>efp Ppu</i> 33 34 35<br>OL fw | ATC ATG AAG ACC AAG CTG<br>AAG AAC CTG                                              |             | this study |
| P46                                                                         | <i>efp Ppu</i> N33D<br>OL rev    | CTT CAG CTT GGT CTT CAT<br>GAT CGC GCT ATC ACG GCC<br>CGA CTT                       |             | this study |



|                                                                 |                                           |                                                               |  |            |
|-----------------------------------------------------------------|-------------------------------------------|---------------------------------------------------------------|--|------------|
| P47                                                             | <i>efp Ppu</i> N33G<br>OL rev             | CTT CAG CTT GGT CTT CAT<br>GAT CGC GCT GCC ACG GCC<br>CGA CTT |  | this study |
| P48                                                             | <i>efp Ppu</i> S34A<br>OL rev             | CTT CAG CTT GGT CTT CAT<br>GAT CGC CGC GTT ACG GCC<br>CGA     |  | this study |
| P49                                                             | <i>efp Ppu</i> S34Q<br>OL rev             | CTT CAG CTT GGT CTT CAT<br>GAT CGC CTG GTT ACG GCC<br>CGA     |  | this study |
| P50                                                             | <i>efp Ppu</i> A35S<br>OL rev             | CTT CAG CTT GGT CTT CAT<br>GAT GCT GCT GTT ACG GCC            |  | this study |
| <b>Primers cross modification/activation and overproduction</b> |                                           |                                                               |  |            |
| P51                                                             | <i>efp Eco</i> domainI<br>Ppu OL fw       | AAG CTG GAC GAC GTG ATC<br>CTG GAT ATG AAC CTG ACT<br>TAC CTG |  | this study |
| P52                                                             | <i>efp Eco</i> domainI<br>Ppu OL rev      | CAG GTA AGT CAG GTT CAT<br>ATC CAG GAT CAC GTC GTC<br>CAG CTT |  | this study |
| P53                                                             | <i>efp Eco</i> loop<br>Ppu OL fw          | AAG TCG GGC CGT AAC AGC<br>GCG TTT GCT CGC GTT AAA<br>CTG CGT |  | this study |
| P54                                                             | <i>efp Eco</i> loop<br>Ppu OL rev         | CGC GCT GTT ACG GCC CGA<br>CTT TAC GAA TTC ACT CGC<br>TTC AAC |  | this study |
| P55                                                             | <i>efp Eco</i> P32S<br>K34R OL fw         | GAA TTC GTA AAA AGC GGT<br>CGC GGC CAG GCA TTT                |  | this study |
| P56                                                             | EF-P <i>Eco</i> P32S<br>K34R OL rev       | AAA TGC CTG GCC GCG ACC<br>GCT TTT TAC GAA TTC                |  | this study |
| P57                                                             | <i>efp Eco</i> K34R<br>G35N OL fw         | CCG GGT CGC AAC CAG GCA<br>TTT GCT CG                         |  | this study |
| P58                                                             | <i>efp Eco</i> K34R<br>G35N OL rev        | CGA GCA AAT GCC TGG TTG<br>CGA CCC GG                         |  | this study |
| P59                                                             | <i>efp Eco</i> K34R<br>Q36S OL fw         | CGC GGC AGC GCA TTT GCT<br>CGC GTT A                          |  | this study |
| P60                                                             | <i>efp Eco</i> K34R<br>Q36S OL rev        | TAA CGC GAG CAA ATG CGC<br>TGC CGC G                          |  | this study |
| P61                                                             | <i>efp Eco</i> P32S<br>K34R G35N OL<br>fw | AGC GGT CGC AAC CAG GCA<br>TTT GCT CG                         |  | this study |

|                                                            |                                            |                                                                     |             |            |
|------------------------------------------------------------|--------------------------------------------|---------------------------------------------------------------------|-------------|------------|
| P62                                                        | <i>efp Eco</i> P32S<br>K34R G35N OL<br>rev | CGA GCA AAT GCC TGG TTG<br>CGA CCG CT                               |             | this study |
| P63                                                        | <i>efp Eco</i> P32S<br>K34R Q36S OL<br>fw  | AGC GGT CGC GGC AGC GCA<br>TTT GCT CG                               |             | this study |
| P64                                                        | <i>efp Eco</i> P32S<br>K34R Q36S OL<br>rev | CGA GCA AAT GCG CTG CCG<br>CGA CCG CT                               |             | this study |
| P65                                                        | <i>efp Eco</i> K34R<br>G35N Q36S OL<br>fw  | GGG TCG CAA CAG CGC ATT<br>TG                                       |             | this study |
| P66                                                        | <i>efp Eco</i> K34R<br>G35N Q36S OL<br>rev | CAA ATG CGC TGT TGC GAC<br>CC                                       |             | this study |
| P67                                                        | <i>earP So</i> rev                         | GCG GTA CCC GAT TTT CTA<br>TTT CAG CGC AGC AT                       | <i>KpnI</i> | this study |
| <b>Primers pET SUMO constructs</b>                         |                                            |                                                                     |             |            |
| P68                                                        | <i>efp Eco</i> -SUMO-<br>fw                | ATG GCA ACG TAC TAT AGC<br>AAC GAT TTT                              |             | this study |
| P69                                                        | <i>efp Eco</i> -SUMO-<br>rev               | TTA GTG ATG GTG ATG GTG<br>ATG GCT                                  |             | this study |
| P70                                                        | <i>efp Eco</i> K34R<br>OL fw               | GTA AAA CCG GGT CGC GGC<br>CAG GCA TTT                              |             | this study |
| P71                                                        | <i>efp Eco</i> K34R<br>OL rev              | AAA TGC CTG GCC GCG ACC<br>CGG TTT TAC                              |             | this study |
| <b>Primers isoelectric focusing and pBAD33-<i>epmA</i></b> |                                            |                                                                     |             |            |
| P72                                                        | <i>efp-yjeA</i> -OL-<br><i>XbaI</i> -fw    | CGT GAA GTA ATC TAG ATT<br>GTC AAA AAC TGG AGA TTT<br>AAC TAT GAG C | <i>XbaI</i> | this study |
| P73                                                        | <i>efp-yjeA</i> -OL-<br><i>XbaI</i> -rev   | TTT TTG ACA ATC TAG ATT<br>ACT TCA CGC GAG AGA CGT<br>ATT CA        | <i>XbaI</i> | this study |
| P74                                                        | <i>yjeA-yjeK</i> -OL-<br><i>PstI</i> -fw   | GCA TAA CTG CAG GGT AGC<br>TAA GCC ACA AAA TGG CG                   | <i>PstI</i> | this study |
| P75                                                        | <i>yjeA-yjeK</i> -OL-<br><i>PstI</i> -rev  | GCT ACC CTG CAG TTA TGC<br>CCG GTC AAC GCT AAA G                    | <i>PstI</i> | this study |
| P76                                                        | <i>SacI</i> -RBS- <i>efp</i> -<br>fw       | GCG ATG AGC TCA ATT AAC<br>AAA TTT CAG AGG GCC TTA<br>TGG           | <i>SacI</i> | this study |

|                                                              |                            |                                                              |             |            |
|--------------------------------------------------------------|----------------------------|--------------------------------------------------------------|-------------|------------|
| P77                                                          | SphI- <i>yjeK</i> -rev     | GCA TCG CAT GCT TAC TGC<br>TGG CGT AGC TGG AG                | <i>SphI</i> | this study |
| <b>Primer for strain construction of MG-CR-efp-epmA-KanR</b> |                            |                                                              |             |            |
| P78                                                          | <i>epmA</i> fw             | CAC<br>CGC TGT TTG ATT CCT GCG T                             |             | this study |
| P79                                                          | <i>epmA</i> rev            | GCT ACA GAA TGG CGC TTA T<br>CA CG                           |             | this study |
| <b>Primer for for bacterial two-hybrid (BTH)</b>             |                            |                                                              |             |            |
| P80                                                          | <i>XbaI-efp-Eco</i><br>FW  | GTA TCG TCT AGA GGC AAC<br>GTA CTA TAG CAA CGA TTT<br>TCG TG | <i>XbaI</i> | this study |
| P81                                                          | <i>XmaI-efp-Eco</i><br>Rev | GTA TCG CCC GGG ACT TCA<br>CGC GAG AGA CGT ATT CAC C         | <i>XmaI</i> | this study |

## References

- Baba, T., Ara, T., Hasegawa, M., Takai, Y., Okumura, Y., Baba, M., et al. (2006). Construction of *Escherichia coli* K-12 in-frame, single-gene knockout mutants: the Keio collection. *Mol. Syst. Biol.* 2, 2006 0008. doi:10.1038/msb4100050
- Datsenko, K.A., and Wanner, B.L. (2000). One-step inactivation of chromosomal genes in *Escherichia coli* K-12 using PCR products. *Proc. Natl. Acad. Sci. USA* 97, 6640-6645. doi:10.1073/pnas.120163297
- Fried, L., Lassak, J., and Jung, K. (2012). A comprehensive toolbox for the rapid construction of *lacZ* fusion reporters. *J. Microbiol. Methods* 91, 537-543. doi:10.1016/j.mimet.2012.09.023
- Guzman, L.M., Belin, D., Carson, M.J., and Beckwith, J. (1995). Tight regulation, modulation, and high-level expression by vectors containing the arabinose  $P_{BAD}$  promoter. *J. Bacteriol.* 177, 4121-4130.
- Karimova, G., Dautin, N., and Ladant, D. (2005). Interaction network among *Escherichia coli* membrane proteins involved in cell division as revealed by bacterial two-hybrid analysis. *J. Bacteriol.* 187, 2233-2243. doi:10.1128/JB.187.7.2233-2243.2005
- Kovach, M.E., Elzer, P.H., Hill, D.S., Robertson, G.T., Farris, M.A., Roop, R.M., 2nd, et al. (1995). Four new derivatives of the broad-host-range cloning vector pBBR1MCS, carrying different antibiotic-resistance cassettes. *Gene* 166, 175-176.
- Krafczyk, R., Macosek, J., Jagtap, P.K.A., Gast, D., Wunder, S., Mitra, P., et al. (2017). Structural Basis for EarP-Mediated Arginine Glycosylation of Translation Elongation Factor EF-P. *mBio* 8, e01412-01417. doi:10.1128/mBio.01412-17
- Lassak, J., Henche, A.L., Binnenkade, L., and Thormann, K.M. (2010). ArcS, the cognate sensor kinase in an atypical Arc system of *Shewanella oneidensis* MR-1. *Appl. Environ. Microbiol.* 76, 3263-3274. doi:10.1128/AEM.00512-10
- Lassak, J., Keilhauer, E.C., Fürst, M., Wuichet, K., Gödeke, J., Starosta, A.L., et al. (2015). Arginine-rhamnosylation as new strategy to activate translation elongation factor P. *Nat. Chem. Biol.* 11, 266-270. doi:10.1038/nchembio.1751
- Macinga, D.R., Parojcic, M.M., and Rather, P.N. (1995). Identification and analysis of *aarP*, a transcriptional activator of the 2'-N-acetyltransferase in *Providencia stuartii*. *J. Bacteriol.* 177, 3407-3413.
- Peil, L., Starosta, A.L., Lassak, J., Atkinson, G.C., Virumae, K., Spitzer, M., et al. (2013). Distinct XPPX sequence motifs induce ribosome stalling, which is rescued by the translation elongation factor EF-P. *Proc. Natl. Acad. Sci. USA* 110, 15265-15270. doi:10.1073/pnas.1310642110
- Studier, F.W., and Moffatt, B.A. (1986). Use of bacteriophage T7 RNA polymerase to direct selective high-level expression of cloned genes. *J. Mol. Biol.* 189, 113-130.
- Ude, S.C.M. (2013). *The role of elongation factor EF-P in translation and in copy number control of the transcriptional regulator CadC in Escherichia coli*. Dissertation, LMU München: Faculty of Biology.
- Volkwein, W., Maier, C., Krafczyk, R., Jung, K., and Lassak, J. (2017). A versatile toolbox for the control of protein levels using  $N_{\epsilon}$ -acetyl-L-lysine dependent amber suppression. *ACS Synth. Biol.* 6, 1892-1902. doi:10.1021/acssynbio.7b00048
