# Supplementary material for: Switching the Post-translational Modification of Translation Elongation Factor EF-P
Source: Front Microbiol. 2019 May 24;10:1148. doi: 10.3389/fmicb.2019.01148 (PMC6544042; doi:10.3389/fmicb.2019.01148)
Supplement: Supplementary file 1 [file Data_Sheet_1.xlsx]

## Sheet: table_new
Supplementary Dataset S1: Distribution of EF-P, 32nd 34th EpmA EpmC EarP DHS YmfI in the representative genome set.
Genome	Protein	32nd	34th	EpmA	EpmC	EarP	DHS	YmfI	Lineage
GCF_000005845.2_ASM584v2	NP_418571.1	P	K	+	+	-	-	-	Bacteria; Proteobacteria; Gammaproteobacteria; Enterobacterales; Enterobacteriaceae; Escherichia; Escherichia coli; Escherichia coli K-12
GCF_000006745.1_ASM674v1	NP_232288.1	P	K	+	+	-	-	-	Bacteria; Proteobacteria; Gammaproteobacteria; Vibrionales; Vibrionaceae; Vibrio; Vibrio cholerae; Vibrio cholerae O1; Vibrio cholerae O1 biovar El Tor
GCF_000006765.1_ASM676v1	NP_251541.1	S	R	-	-	+	-	-	Bacteria; Proteobacteria; Gammaproteobacteria; Pseudomonadales; Pseudomonadaceae; Pseudomonas; Pseudomonas aeruginosa group; Pseudomonas aeruginosa
GCF_000006785.2_ASM678v2	NP_269824.1	P	K	+	-	-	-	-	Bacteria; Terrabacteria group; Firmicutes; Bacilli; Lactobacillales; Streptococcaceae; Streptococcus; Streptococcus pyogenes; Streptococcus pyogenes serotype M1
GCF_000006845.1_ASM684v1	YP_208043.1	G	R	-	-	+	-	-	Bacteria; Proteobacteria; Betaproteobacteria; Neisseriales; Neisseriaceae; Neisseria; Neisseria gonorrhoeae
GCF_000006865.1_ASM686v1	NP_266848.1	P	K	-	-	-	-	-	Bacteria; Terrabacteria group; Firmicutes; Bacilli; Lactobacillales; Streptococcaceae; Lactococcus; Lactococcus lactis; Lactococcus lactis subsp. lactis
GCF_000006905.1_ASM690v1	NP_419538.1	P	K	+	-	-	+	-	Bacteria; Proteobacteria; Alphaproteobacteria; Caulobacterales; Caulobacteraceae; Caulobacter; Caulobacter vibrioides
GCF_000006925.2_ASM692v2	NP_710014.1	P	K	+	+	-	-	-	Bacteria; Proteobacteria; Gammaproteobacteria; Enterobacterales; Enterobacteriaceae; Shigella; Shigella flexneri; Shigella flexneri 2a
GCF_000006945.2_ASM694v2	NP_463198.1	P	K	+	+	-	-	-	Bacteria; Proteobacteria; Gammaproteobacteria; Enterobacterales; Enterobacteriaceae; Salmonella; Salmonella enterica; Salmonella enterica subsp. enterica; Salmonella enterica subsp. enterica serovar Typhimurium
GCF_000006965.1_ASM696v1	NP_384383.1	P	K	+	-	-	-	-	Bacteria; Proteobacteria; Alphaproteobacteria; Rhizobiales; Rhizobiaceae; Sinorhizobium/Ensifer group; Sinorhizobium; Sinorhizobium meliloti
GCF_000006985.1_ASM698v1	NP_661065.1	P	N	-	-	-	+	-	Bacteria; FCB group; Bacteroidetes/Chlorobi group; Chlorobi; Chlorobia; Chlorobiales; Chlorobiaceae; Chlorobaculum; Chlorobaculum tepidum
GCF_000007045.1_ASM704v1	NP_357986.1	P	K	-	-	-	-	-	Bacteria; Terrabacteria group; Firmicutes; Bacilli; Lactobacillales; Streptococcaceae; Streptococcus; Streptococcus pneumoniae
GCF_000007145.1_ASM714v1	NP_637627.1	P	K	+	-	-	-	+	Bacteria; Proteobacteria; Gammaproteobacteria; Xanthomonadales; Xanthomonadaceae; Xanthomonas; Xanthomonas campestris; Xanthomonas campestris pv. campestris
GCF_000007265.1_ASM726v1	NP_688686.1	P	K	-	-	-	-	-	Bacteria; Terrabacteria group; Firmicutes; Bacilli; Lactobacillales; Streptococcaceae; Streptococcus; Streptococcus agalactiae; Streptococcus agalactiae serogroup V
GCF_000007325.1_ASM732v1	NP_603617.1	S	R	-	-	+	-	-	Bacteria; Fusobacteria; Fusobacteriia; Fusobacteriales; Fusobacteriaceae; Fusobacterium; Fusobacterium nucleatum; Fusobacterium nucleatum subsp. nucleatum
GCF_000007525.1_ASM752v1	NP_695295.1	P	K	-	-	-	-	-	Bacteria; Terrabacteria group; Actinobacteria; Actinobacteria; Bifidobacteriales; Bifidobacteriaceae; Bifidobacterium; Bifidobacterium longum
GCF_000007565.2_ASM756v2	NP_744013.1	S	R	-	-	+	-	-	Bacteria; Proteobacteria; Gammaproteobacteria; Pseudomonadales; Pseudomonadaceae; Pseudomonas; Pseudomonas putida group; Pseudomonas putida
GCF_000007645.1_ASM764v1	NP_764768.1	P	K	-	-	-	-	+	Bacteria; Terrabacteria group; Firmicutes; Bacilli; Bacillales; Staphylococcaceae; Staphylococcus; Staphylococcus epidermidis
GCF_000007765.2_ASM776v2	NP_820795.1	P	K	+	-	-	+	-	Bacteria; Proteobacteria; Gammaproteobacteria; Legionellales; Coxiellaceae; Coxiella; Coxiella burnetii
GCF_000007825.1_ASM782v1	NP_833911.1	P	K	-	-	-	-	+	Bacteria; Terrabacteria group; Firmicutes; Bacilli; Bacillales; Bacillaceae; Bacillus; Bacillus cereus group; Bacillus cereus
GCF_000007985.2_ASM798v2	NP_951524.1	P	A	+	-	-	-	-	Bacteria; Proteobacteria; delta/epsilon subdivisions; Deltaproteobacteria; Desulfuromonadales; Geobacteraceae; Geobacter; Geobacter sulfurreducens
GCF_000007985.2_ASM798v2	NP_952802.1	P	K	+	-	-	-	-	Bacteria; Proteobacteria; delta/epsilon subdivisions; Deltaproteobacteria; Desulfuromonadales; Geobacteraceae; Geobacter; Geobacter sulfurreducens
GCF_000008305.1_ASM830v1	YP_053650.1	T	R	-	-	-	-	-	Bacteria; Terrabacteria group; Tenericutes; Mollicutes; Entomoplasmatales; Entomoplasmataceae; Mesoplasma; Mesoplasma florum
GCF_000008485.1_ASM848v1	YP_094341.1	P	K	+	+	-	-	-	Bacteria; Proteobacteria; Gammaproteobacteria; Legionellales; Legionellaceae; Legionella; Legionella pneumophila; Legionella pneumophila subsp. pneumophila
GCF_000008565.1_ASM856v1	NP_293845.1	M	R	-	-	-	-	-	Bacteria; Terrabacteria group; Deinococcus-Thermus; Deinococci; Deinococcales; Deinococcaceae; Deinococcus; Deinococcus radiodurans
GCF_000008685.2_ASM868v2	NP_212348.1	T	R	-	-	-	-	-	Bacteria; Spirochaetes; Spirochaetia; Spirochaetales; Borreliaceae; Borreliella; Borreliella burgdorferi
GCF_000008725.1_ASM872v1	NP_220271.1	P	K	-	-	-	-	-	Bacteria; PVC group; Chlamydiae; Chlamydiia; Chlamydiales; Chlamydiaceae; Chlamydia/Chlamydophila group; Chlamydia; Chlamydia trachomatis
GCF_000008745.1_ASM874v1	NP_224393.1	G	K	-	-	-	-	-	Bacteria; PVC group; Chlamydiae; Chlamydiia; Chlamydiales; Chlamydiaceae; Chlamydia/Chlamydophila group; Chlamydia; Chlamydia pneumoniae
GCF_000008745.1_ASM874v1	NP_225090.1	P	K	-	-	-	-	-	Bacteria; PVC group; Chlamydiae; Chlamydiia; Chlamydiales; Chlamydiaceae; Chlamydia/Chlamydophila group; Chlamydia; Chlamydia pneumoniae
GCF_000008805.1_ASM880v1	NP_273975.1	G	R	-	-	+	-	-	Bacteria; Proteobacteria; Betaproteobacteria; Neisseriales; Neisseriaceae; Neisseria; Neisseria meningitidis; Neisseria meningitidis serogroup B
GCF_000008865.2_ASM886v2	NP_313155.1	P	K	+	+	-	-	-	Bacteria; Proteobacteria; Gammaproteobacteria; Enterobacterales; Enterobacteriaceae; Escherichia; Escherichia coli; Escherichia coli O157:H7
GCF_000008925.1_ASM892v1	YP_536586.1	P	K	-	-	-	-	+	Bacteria; Terrabacteria group; Firmicutes; Bacilli; Lactobacillales; Lactobacillaceae; Lactobacillus; Lactobacillus salivarius
GCF_000009045.1_ASM904v1	NP_390325.2	P	K	-	-	-	-	+	Bacteria; Terrabacteria group; Firmicutes; Bacilli; Bacillales; Bacillaceae; Bacillus; Bacillus subtilis group; Bacillus subtilis; Bacillus subtilis subsp. subtilis
GCF_000009345.1_ASM934v1	YP_001004733.1	P	K	+	+	-	-	-	Bacteria; Proteobacteria; Gammaproteobacteria; Enterobacterales; Yersiniaceae; Yersinia; Yersinia enterocolitica; Yersinia enterocolitica subsp. enterocolitica
GCF_000009925.1_ASM992v1	YP_097769.1	P	K	-	-	-	-	-	Bacteria; FCB group; Bacteroidetes/Chlorobi group; Bacteroidetes; Bacteroidia; Bacteroidales; Bacteroidaceae; Bacteroides; Bacteroides fragilis
GCF_000011065.1_ASM1106v1	NP_812620.1	P	K	-	-	-	-	-	Bacteria; FCB group; Bacteroidetes/Chlorobi group; Bacteroidetes; Bacteroidia; Bacteroidales; Bacteroidaceae; Bacteroides; Bacteroides thetaiotaomicron
GCF_000011325.1_ASM1132v1	NP_600833.1	P	K	-	-	-	-	-	Bacteria; Terrabacteria group; Actinobacteria; Actinobacteria; Corynebacteriales; Corynebacteriaceae; Corynebacterium; Corynebacterium glutamicum
GCF_000011345.1_ASM1134v1	NP_682084.1	P	K	-	-	-	+	-	Bacteria; Terrabacteria group; Cyanobacteria/Melainabacteria group; Cyanobacteria; Synechococcales; Synechococcaceae; Thermosynechococcus; Thermosynechococcus elongatus
GCF_000011445.1_ASM1144v1	NP_975437.1	T	R	+	-	-	-	-	Bacteria; Terrabacteria group; Tenericutes; Mollicutes; Mycoplasmatales; Mycoplasmataceae; Mycoplasma; Mycoplasma mycoides group; Mycoplasma mycoides; Mycoplasma mycoides subsp. mycoides; Mycoplasma mycoides subsp. mycoides SC
GCF_000011805.1_ASM1180v1	YP_205721.1	P	K	+	+	-	-	-	Bacteria; Proteobacteria; Gammaproteobacteria; Vibrionales; Vibrionaceae; Aliivibrio; Aliivibrio fischeri
GCF_000011985.1_ASM1198v1	YP_194511.1	P	K	-	-	-	-	+	Bacteria; Terrabacteria group; Firmicutes; Bacilli; Lactobacillales; Lactobacillaceae; Lactobacillus; Lactobacillus acidophilus
GCF_000012005.1_ASM1200v1	YP_405768.1	P	K	+	+	-	-	-	Bacteria; Proteobacteria; Gammaproteobacteria; Enterobacterales; Enterobacteriaceae; Shigella; Shigella dysenteriae
GCF_000013045.1_ASM1304v1	YP_445068.1	P	K	-	-	-	-	-	Bacteria; FCB group; Bacteroidetes/Chlorobi group; Bacteroidetes; Bacteroidetes Order II. Incertae sedis; Rhodothermaceae; Salinibacter; Salinibacter ruber
GCF_000013085.1_ASM1308v1	YP_426165.1	P	K	+	-	-	-	-	Bacteria; Proteobacteria; Alphaproteobacteria; Rhodospirillales; Rhodospirillaceae; Rhodospirillum; Rhodospirillum rubrum
GCF_000013105.1_ASM1310v1	YP_430390.1	P	K	-	-	-	-	-	Bacteria; Terrabacteria group; Firmicutes; Clostridia; Thermoanaerobacterales; Thermoanaerobacteraceae; Moorella group; Moorella; Moorella thermoacetica
GCF_000014205.1_ASM1420v1	YP_001034448.1	P	K	-	-	-	-	-	Bacteria; Terrabacteria group; Firmicutes; Bacilli; Lactobacillales; Streptococcaceae; Streptococcus; Streptococcus sanguinis
GCF_000014525.1_ASM1452v1	YP_807261.1	P	K	-	-	-	-	+	Bacteria; Terrabacteria group; Firmicutes; Bacilli; Lactobacillales; Lactobacillaceae; Lactobacillus; Lactobacillus casei group; Lactobacillus paracasei
GCF_000014805.1_ASM1480v1	YP_857718.1	S	R	-	-	+	-	-	Bacteria; Proteobacteria; Gammaproteobacteria; Aeromonadales; Aeromonadaceae; Aeromonas; Aeromonas hydrophila; Aeromonas hydrophila subsp. hydrophila
GCF_000017045.1_ASM1704v1	YP_001387696.1	P	K	-	-	-	-	-	Bacteria; Terrabacteria group; Firmicutes; Clostridia; Clostridiales; Clostridiaceae; Clostridium; Clostridium botulinum; Clostridium botulinum A
GCF_000017145.1_ASM1714v1	YP_001329131.1	P	K	+	-	-	-	-	Bacteria; Proteobacteria; Alphaproteobacteria; Rhizobiales; Rhizobiaceae; Sinorhizobium/Ensifer group; Sinorhizobium; Sinorhizobium medicae
GCF_000018545.1_ASM1854v1	YP_002828089.1	P	K	+	-	-	-	-	Bacteria; Proteobacteria; Alphaproteobacteria; Rhizobiales; Rhizobiaceae; Sinorhizobium/Ensifer group; Sinorhizobium; Sinorhizobium fredii group; Sinorhizobium fredii
GCF_000018865.1_ASM1886v1	YP_001636477.1	P	N	-	-	-	+	-	Bacteria; Terrabacteria group; Chloroflexi; Chloroflexia; Chloroflexales; Chloroflexineae; Chloroflexaceae; Chloroflexus; Chloroflexus aurantiacus
GCF_000020985.1_ASM2098v1	YP_002248247.1	M	Q	-	-	-	-	-	Bacteria; Nitrospirae; Nitrospira; Nitrospirales; Nitrospiraceae; Thermodesulfovibrio; Thermodesulfovibrio yellowstonii
GCF_000022005.1_ASM2200v1	YP_002516131.1	P	K	+	-	-	+	-	Bacteria; Proteobacteria; Alphaproteobacteria; Caulobacterales; Caulobacteraceae; Caulobacter; Caulobacter vibrioides; Caulobacter vibrioides CB15
GCF_000024905.1_ASM2490v1	YP_003317556.1	M	R	-	-	-	-	-	Bacteria; Synergistetes; Synergistia; Synergistales; Synergistaceae; Thermanaerovibrio; Thermanaerovibrio acidaminovorans
GCF_000025565.1_ASM2556v1	YP_003611062.1	P	K	+	+	-	-	-	Bacteria; Proteobacteria; Gammaproteobacteria; Enterobacterales; Enterobacteriaceae; Enterobacter; Enterobacter cloacae complex; Enterobacter cloacae; Enterobacter cloacae subsp. cloacae
GCF_000026345.1_ASM2634v1	YP_002410476.1	P	K	+	+	-	-	-	Bacteria; Proteobacteria; Gammaproteobacteria; Enterobacterales; Enterobacteriaceae; Escherichia; Escherichia coli
GCF_000026745.1_ASM2674v1	YP_003029392.1	P	K	-	-	-	-	-	Bacteria; Terrabacteria group; Firmicutes; Bacilli; Lactobacillales; Streptococcaceae; Streptococcus; Streptococcus suis
GCF_000027165.1_ASM2716v1	YP_003446771.1	P	K	-	-	-	-	-	Bacteria; Terrabacteria group; Firmicutes; Bacilli; Lactobacillales; Streptococcaceae; Streptococcus; Streptococcus mitis
GCF_000027305.1_ASM2730v1	NP_438492.3	P	K	+	+	-	-	-	Bacteria; Proteobacteria; Gammaproteobacteria; Pasteurellales; Pasteurellaceae; Haemophilus; Haemophilus influenzae
GCF_000063585.1_ASM6358v1	YP_001254399.1	P	K	-	-	-	-	-	Bacteria; Terrabacteria group; Firmicutes; Clostridia; Clostridiales; Clostridiaceae; Clostridium; Clostridium botulinum; Clostridium botulinum A
GCF_000064305.2_ASM6430v2	YP_001295882.1	P	K	-	-	-	+	-	Bacteria; FCB group; Bacteroidetes/Chlorobi group; Bacteroidetes; Flavobacteriia; Flavobacteriales; Flavobacteriaceae; Flavobacterium; Flavobacterium psychrophilum
GCF_000069185.1_ASM6918v1	YP_001703570.1	P	K	-	-	-	-	-	Bacteria; Terrabacteria group; Actinobacteria; Actinobacteria; Corynebacteriales; Mycobacteriaceae; Mycobacteroides
GCF_000091545.1_ASM9154v1	YP_144391.1	L	R	-	-	-	+	-	Bacteria; Terrabacteria group; Deinococcus-Thermus; Deinococci; Thermales; Thermaceae; Thermus; Thermus thermophilus
GCF_000092025.1_ASM9202v1	NP_355493.1	P	K	+	-	-	-	-	Bacteria; Proteobacteria; Alphaproteobacteria; Rhizobiales; Rhizobiaceae; Rhizobium/Agrobacterium group; Agrobacterium; Agrobacterium tumefaciens complex; Agrobacterium fabrum
GCF_000092565.1_ASM9256v1	NP_714838.1	P	K	+	-	-	-	-	Bacteria; Spirochaetes; Spirochaetia; Leptospirales; Leptospiraceae; Leptospira; Leptospira interrogans; Leptospira interrogans serovar Lai
GCF_000146165.2_ASM14616v2	NP_717918.1	S	R	-	-	+	-	-	Bacteria; Proteobacteria; Gammaproteobacteria; Alteromonadales; Shewanellaceae; Shewanella; Shewanella oneidensis
GCF_000159155.2_ASM15915v2	YP_003985860.1	P	K	-	-	-	-	-	Bacteria; Terrabacteria group; Actinobacteria; Actinobacteria; Bifidobacteriales; Bifidobacteriaceae; Gardnerella; Gardnerella vaginalis
GCF_000165905.1_ASM16590v1	YP_003971379.1	P	K	-	-	-	-	-	Bacteria; Terrabacteria group; Actinobacteria; Actinobacteria; Bifidobacteriales; Bifidobacteriaceae; Bifidobacterium; Bifidobacterium bifidum
GCF_000174395.2_ASM17439v2	YP_006375080.1	P	K	-	-	-	-	-	Bacteria; Terrabacteria group; Firmicutes; Bacilli; Lactobacillales; Enterococcaceae; Enterococcus; Enterococcus faecium
GCF_000183345.1_ASM18334v1	YP_006122560.1	P	K	+	+	-	-	-	Bacteria; Proteobacteria; Gammaproteobacteria; Enterobacterales; Enterobacteriaceae; Escherichia; Escherichia coli; Escherichia coli O83:H1
GCF_000185905.1_ASM18590v1	YP_004140482.1	P	K	+	-	-	-	-	Bacteria; Proteobacteria; Alphaproteobacteria; Rhizobiales; Phyllobacteriaceae; Mesorhizobium; Mesorhizobium ciceri; Mesorhizobium ciceri biovar biserrulae
GCF_000185905.1_ASM18590v1	YP_004143742.1	P	K	+	-	-	-	-	Bacteria; Proteobacteria; Alphaproteobacteria; Rhizobiales; Phyllobacteriaceae; Mesorhizobium; Mesorhizobium ciceri; Mesorhizobium ciceri biovar biserrulae
GCF_000191145.1_ASM19114v1	YP_004996158.1	P	K	+	+	-	-	-	Bacteria; Proteobacteria; Gammaproteobacteria; Pseudomonadales; Moraxellaceae; Acinetobacter; Acinetobacter calcoaceticus/baumannii complex; Acinetobacter pittii
GCF_000195715.1_ASM19571v1	NP_880680.1	S	R	-	-	+	-	-	Bacteria; Proteobacteria; Betaproteobacteria; Burkholderiales; Alcaligenaceae; Bordetella; Bordetella pertussis
GCF_000195735.1_ASM19573v1	NP_220623.1	P	K	-	-	-	-	-	Bacteria; Proteobacteria; Alphaproteobacteria; Rickettsiales; Rickettsiaceae; Rickettsieae; Rickettsia; typhus group; Rickettsia prowazekii
GCF_000195755.1_ASM19575v1	YP_010884.1	P	K	-	-	-	-	-	Bacteria; Proteobacteria; delta/epsilon subdivisions; Deltaproteobacteria; Desulfovibrionales; Desulfovibrionaceae; Desulfovibrio; Desulfovibrio vulgaris
GCF_000195835.2_ASM19583v2	YP_009359912.1	P	K	-	-	-	-	-	Bacteria; Terrabacteria group; Actinobacteria; Actinobacteria; Corynebacteriales; Mycobacteriaceae; Mycobacterium; Mycobacterium tuberculosis complex; Mycobacterium tuberculosis; Mycobacterium tuberculosis variant bovis
GCF_000195855.1_ASM19585v1	NP_301447.1	P	K	-	-	-	-	-	Bacteria; Terrabacteria group; Actinobacteria; Actinobacteria; Corynebacteriales; Mycobacteriaceae; Mycobacterium; Mycobacterium leprae
GCF_000195955.2_ASM19595v2	NP_217050.1	P	K	-	-	-	-	-	Bacteria; Terrabacteria group; Actinobacteria; Actinobacteria; Corynebacteriales; Mycobacteriaceae; Mycobacterium; Mycobacterium tuberculosis complex; Mycobacterium tuberculosis
GCF_000195995.1_ASM19599v1	NP_458773.1	P	K	+	-	-	-	-	Bacteria; Proteobacteria; Gammaproteobacteria; Enterobacterales; Enterobacteriaceae; Salmonella; Salmonella enterica; Salmonella enterica subsp. enterica; Salmonella enterica subsp. enterica serovar Typhi
GCF_000196035.1_ASM19603v1	NP_464880.1	P	K	-	-	-	-	+	Bacteria; Terrabacteria group; Firmicutes; Bacilli; Bacillales; Listeriaceae; Listeria; Listeria monocytogenes
GCF_000196095.1_ASM19609v1	NP_799224.1	P	K	+	+	-	-	-	Bacteria; Proteobacteria; Gammaproteobacteria; Vibrionales; Vibrionaceae; Vibrio; Vibrio harveyi group; Vibrio parahaemolyticus
GCF_000196115.1_ASM19611v1	NP_864290.1	P	K	+	-	-	+	-	Bacteria; PVC group; Planctomycetes; Planctomycetia; Planctomycetales; Planctomycetaceae; Rhodopirellula; Rhodopirellula baltica
GCF_000196835.1_ASM19683v1	YP_003764938.1	P	K	+	-	-	-	-	Bacteria; Terrabacteria group; Actinobacteria; Actinobacteria; Pseudonocardiales; Pseudonocardiaceae; Amycolatopsis; Amycolatopsis mediterranei
GCF_000203835.1_ASM20383v1	NP_625771.1	P	K	-	-	-	-	-	Bacteria; Terrabacteria group; Actinobacteria; Actinobacteria; Streptomycetales; Streptomycetaceae; Streptomyces; Streptomyces albidoflavus group; Streptomyces coelicolor
GCF_000203855.3_ASM20385v3	YP_004889424.1	P	K	-	-	-	-	-	Bacteria; Terrabacteria group; Firmicutes; Bacilli; Lactobacillales; Lactobacillaceae; Lactobacillus; Lactobacillus plantarum
GCF_000215745.1_ASM21574v1	YP_004592037.1	P	K	+	+	-	-	-	Bacteria; Proteobacteria; Gammaproteobacteria; Enterobacterales; Enterobacteriaceae; Klebsiella; Klebsiella aerogenes
GCF_000223375.1_ASM22337v1	YP_005794961.1	P	K	+	-	-	-	-	Bacteria; Proteobacteria; Alphaproteobacteria; Rhodobacterales; Rhodobacteraceae; Ketogulonicigenium; Ketogulonicigenium vulgare
GCF_000240185.1_ASM24018v2	YP_005224692.1	P	K	+	+	-	-	-	Bacteria; Proteobacteria; Gammaproteobacteria; Enterobacterales; Enterobacteriaceae; Klebsiella; Klebsiella pneumoniae; Klebsiella pneumoniae subsp. pneumoniae
GCF_000299455.1_ASM29945v1	YP_006781237.1	P	K	+	+	-	-	-	Bacteria; Proteobacteria; Gammaproteobacteria; Enterobacterales; Enterobacteriaceae; Escherichia; Escherichia coli; Escherichia coli O104:H4
GCF_000317935.1_ASM31793v1	YP_006895512.1	S	R	-	-	+	-	-	Bacteria; Proteobacteria; Betaproteobacteria; Burkholderiales; Alcaligenaceae; Bordetella; Bordetella parapertussis
GCF_000318015.1_ASM31801v1	YP_006967742.1	S	R	-	-	+	-	-	Bacteria; Proteobacteria; Betaproteobacteria; Burkholderiales; Alcaligenaceae; Bordetella; Bordetella bronchiseptica
GCF_000006605.1_ASM660v1	WP_005294892.1	P	K	-	-	-	-	-	Bacteria; Terrabacteria group; Actinobacteria; Actinobacteria; Corynebacteriales; Corynebacteriaceae; Corynebacterium
GCF_000006685.1_ASM668v1	WP_010229486.1	P	K	-	-	-	-	-	Bacteria; PVC group; Chlamydiae; Chlamydiia; Chlamydiales; Chlamydiaceae; Chlamydia/Chlamydophila group; Chlamydia
GCF_000006685.1_ASM668v1	WP_010230363.1	G	K	-	-	-	-	-	Bacteria; PVC group; Chlamydiae; Chlamydiia; Chlamydiales; Chlamydiaceae; Chlamydia/Chlamydophila group; Chlamydia
GCF_000006725.1_ASM672v1	WP_004086027.1	P	K	+	-	-	-	-	Bacteria; Proteobacteria; Gammaproteobacteria; Xanthomonadales; Xanthomonadaceae; Xylella
GCF_000007085.1_ASM708v1	WP_011025596.1	P	K	-	-	-	-	-	Bacteria; Terrabacteria group; Firmicutes; Clostridia; Thermoanaerobacterales; Thermoanaerobacteraceae; Caldanaerobacter
GCF_000007125.1_ASM712v1	WP_002964799.1	P	K	-	-	-	-	-	Bacteria; Proteobacteria; Alphaproteobacteria; Rhizobiales; Brucellaceae
GCF_000007365.1_ASM736v1	WP_011053559.1	P	K	-	-	-	-	-	Bacteria; Proteobacteria; Gammaproteobacteria; Enterobacterales; Erwiniaceae; Buchnera
GCF_000007485.1_ASM748v1	WP_011096352.1	P	K	-	-	-	-	-	Bacteria; Terrabacteria group; Actinobacteria; Actinobacteria; Micrococcales; unclassified Micrococcales; Tropheryma
GCF_000007605.1_ASM760v1	WP_011006510.1	G	K	-	-	-	-	-	Bacteria; PVC group; Chlamydiae; Chlamydiia; Chlamydiales; Chlamydiaceae; Chlamydia/Chlamydophila group; Chlamydia
GCF_000007705.1_ASM770v1	WP_011134931.1	S	R	-	-	+	-	-	Bacteria; Proteobacteria; Betaproteobacteria; Neisseriales; Chromobacteriaceae; Chromobacterium group; Chromobacterium
GCF_000007725.1_ASM772v1	WP_011091167.1	P	K	+	-	-	-	-	Bacteria; Proteobacteria; Gammaproteobacteria; Enterobacterales; Erwiniaceae; Buchnera
GCF_000007745.1_ASM774v1	WP_011199687.1	P	K	+	-	-	-	-	Bacteria; Proteobacteria; Gammaproteobacteria; Pasteurellales; Pasteurellaceae
GCF_000007945.1_ASM794v1	WP_010945263.1	P	K	+	+	-	-	-	Bacteria; Proteobacteria; Gammaproteobacteria; Pasteurellales; Pasteurellaceae; Haemophilus
GCF_000008025.1_ASM802v1	WP_006279719.1	P	K	-	-	-	-	-	Bacteria; Proteobacteria; Alphaproteobacteria; Rickettsiales; Anaplasmataceae; Wolbachieae
GCF_000008045.1_ASM804v1	WP_011190697.1	P	K	-	-	-	-	-	Bacteria; Proteobacteria; Alphaproteobacteria; Rickettsiales; Rickettsiaceae; Rickettsieae; Rickettsia; typhus group
GCF_000008325.1_ASM832v1	WP_010960601.1	P	K	+	-	-	-	-	Bacteria; Proteobacteria; Gammaproteobacteria; Methylococcales; Methylococcaceae; Methylococcus
GCF_000008345.1_ASM834v1	WP_002516794.1	P	K	-	-	-	-	-	Bacteria; Terrabacteria group; Actinobacteria; Actinobacteria; Propionibacteriales
GCF_000008365.1_ASM836v1	WP_011265071.1	Q	R	-	-	-	-	-	Bacteria; Terrabacteria group; Tenericutes; Mollicutes; Mycoplasmatales; Mycoplasmataceae; Mycoplasma
GCF_000008465.1_ASM846v1	WP_011235502.1	P	K	+	+	-	-	-	Bacteria; Proteobacteria; Gammaproteobacteria; Alteromonadales; Idiomarinaceae
GCF_000008885.1_ASM888v1	WP_011070091.1	P	K	-	-	-	-	-	Bacteria; Proteobacteria; Gammaproteobacteria; Enterobacterales; Erwiniaceae; Wigglesworthia
GCF_000009125.1_ASM912v1	WP_028852870.1	S	R	-	-	+	-	-	Bacteria; Proteobacteria; Betaproteobacteria; Burkholderiales; Burkholderiaceae
GCF_000009145.1_ASM914v1	WP_011111508.1	S	R	-	-	+	-	-	Bacteria; Proteobacteria; Betaproteobacteria; Nitrosomonadales; Nitrosomonadaceae; Nitrosomonas
GCF_000009365.1_ASM936v1	WP_011589720.1	P	K	+	+	-	-	-	Bacteria; Proteobacteria; Gammaproteobacteria; Oceanospirillales; Alcanivoracaceae
GCF_000009545.1_ASM954v1	WP_015911856.1	P	K	-	-	-	-	-	Bacteria; Terrabacteria group; Firmicutes; Bacilli; Lactobacillales; Streptococcaceae
GCF_000009765.2_ASM976v2	WP_010988257.1	P	K	-	-	-	-	-	Bacteria; Terrabacteria group; Actinobacteria; Actinobacteria; Streptomycetales; Streptomycetaceae
GCF_000009845.1_ASM984v1	WP_011160650.1	P	K	-	-	-	-	-	Bacteria; Terrabacteria group; Tenericutes; Mollicutes; Acholeplasmatales; Acholeplasmataceae; Candidatus Phytoplasma; Candidatus Phytoplasma asteris
GCF_000009865.1_ASM986v1	WP_011275683.1	P	K	-	-	-	-	-	Bacteria; Terrabacteria group; Firmicutes; Bacilli; Bacillales; Staphylococcaceae
GCF_000009905.1_ASM990v1	WP_011195992.1	P	K	-	-	-	-	-	Bacteria; Terrabacteria group; Firmicutes; Clostridia; Clostridiales; Symbiobacteriaceae; Symbiobacterium
GCF_000009945.1_ASM994v1	WP_011457700.1	P	K	-	-	-	-	-	Bacteria; PVC group; Chlamydiae; Chlamydiia; Chlamydiales; Chlamydiaceae; Chlamydia/Chlamydophila group; Chlamydia
GCF_000009945.1_ASM994v1	WP_011458008.1	G	K	-	-	-	-	-	Bacteria; PVC group; Chlamydiae; Chlamydiia; Chlamydiales; Chlamydiaceae; Chlamydia/Chlamydophila group; Chlamydia
GCF_000009985.1_ASM998v1	WP_009868540.1	P	K	+	-	-	-	-	Bacteria; Proteobacteria; Alphaproteobacteria; Rhodospirillales; Rhodospirillaceae
GCF_000010165.1_ASM1016v1	WP_012686011.1	P	K	-	-	-	-	-	Bacteria; Terrabacteria group; Firmicutes; Bacilli
GCF_000010185.1_ASM1018v1	WP_002838657.1	P	K	-	-	-	-	-	Bacteria; Terrabacteria group; Firmicutes; Tissierellia; Tissierellales; Peptoniphilaceae; Finegoldia
GCF_000010405.1_ASM1040v1	WP_011929555.1	P	K	+	-	-	-	-	Bacteria; Proteobacteria; Gammaproteobacteria; unclassified Gammaproteobacteria; sulfur-oxidizing symbionts
GCF_000010425.1_ASM1042v1	WP_003808611.1	P	K	-	-	-	-	-	Bacteria; Terrabacteria group; Actinobacteria; Actinobacteria; Bifidobacteriales; Bifidobacteriaceae; Bifidobacterium
GCF_000010525.1_ASM1052v1	WP_012170921.1	P	K	+	-	-	-	-	Bacteria; Proteobacteria; Alphaproteobacteria; Rhizobiales; Xanthobacteraceae
GCF_000010605.1_ASM1060v1	WP_003970356.1	P	K	-	-	-	-	-	Bacteria; Terrabacteria group; Actinobacteria; Actinobacteria; Streptomycetales; Streptomycetaceae
GCF_000010625.1_ASM1062v1	WP_002762061.1	P	K	-	-	-	-	-	Bacteria; Terrabacteria group; Cyanobacteria/Melainabacteria group; Cyanobacteria; Oscillatoriophycideae; Chroococcales; Microcystaceae
GCF_000010665.1_ASM1066v1	WP_015861069.1	P	K	-	-	-	+	-	Bacteria; Proteobacteria; delta/epsilon subdivisions; Deltaproteobacteria; Desulfovibrionales; Desulfovibrionaceae; Desulfovibrio
GCF_000011025.1_ASM1102v1	WP_005505932.1	P	K	-	-	-	-	-	Bacteria; Terrabacteria group; Actinobacteria; Actinobacteria; Micrococcales; Micrococcaceae
GCF_000011305.1_ASM1130v1	WP_011075583.1	P	K	-	-	-	-	-	Bacteria; Terrabacteria group; Actinobacteria; Actinobacteria; Corynebacteriales; Corynebacteriaceae; Corynebacterium
GCF_000011465.1_ASM1146v1	WP_011131664.1	P	K	-	-	-	-	-	Bacteria; Terrabacteria group; Cyanobacteria/Melainabacteria group; Cyanobacteria; Synechococcales; Prochloraceae; Prochlorococcus
GCF_000011645.1_ASM1164v1	WP_003183413.1	P	K	-	-	-	-	-	Bacteria; Terrabacteria group; Firmicutes; Bacilli; Bacillales; Bacillaceae
GCF_000011685.1_ASM1168v1	WP_011251822.1	P	K	-	-	-	-	-	Bacteria; Proteobacteria; Alphaproteobacteria; Rhodospirillales; Acetobacteraceae; Gluconobacter
GCF_000011905.1_ASM1190v1	WP_010936456.1	-	K	+	-	-	-	-	Bacteria; Terrabacteria group; Chloroflexi; Dehalococcoidia; Dehalococcoidales; Dehalococcoidaceae; Dehalococcoides
GCF_000011905.1_ASM1190v1	WP_010936597.1	P	K	+	-	-	-	-	Bacteria; Terrabacteria group; Chloroflexi; Dehalococcoidia; Dehalococcoidales; Dehalococcoidaceae; Dehalococcoides
GCF_000012085.2_ASM1208v2	WP_011772169.1	M	R	-	-	-	-	-	Bacteria; Spirochaetes; Spirochaetia; Spirochaetales; Borreliaceae; Borrelia
GCF_000012145.1_ASM1214v1	WP_011271364.1	P	K	-	-	-	-	-	Bacteria; Proteobacteria; Alphaproteobacteria; Rickettsiales; Rickettsiaceae; Rickettsieae; Rickettsia; spotted fever group
GCF_000012225.1_ASM1222v1	WP_011412726.1	P	K	-	-	-	-	-	Bacteria; Terrabacteria group; Tenericutes; Mollicutes; Acholeplasmatales; Acholeplasmataceae; Candidatus Phytoplasma; Candidatus Phytoplasma asteris
GCF_000012465.1_ASM1246v1	WP_011293986.1	P	K	-	-	-	-	-	Bacteria; Terrabacteria group; Cyanobacteria/Melainabacteria group; Cyanobacteria; Synechococcales; Prochloraceae; Prochlorococcus
GCF_000012485.1_ASM1248v1	WP_041463936.1	P	N	-	-	-	+	-	Bacteria; FCB group; Bacteroidetes/Chlorobi group; Chlorobi; Chlorobia; Chlorobiales; Chlorobiaceae; Chlorobium/Pelodictyon group; Pelodictyon
GCF_000012565.1_ASM1256v1	WP_011304423.1	P	K	-	-	-	-	-	Bacteria; Proteobacteria; Alphaproteobacteria; Rickettsiales; Anaplasmataceae; Ehrlichia; canis group
GCF_000012605.1_ASM1260v1	WP_011371162.1	P	K	+	+	-	-	-	Bacteria; Proteobacteria; Gammaproteobacteria; Thiotrichales; Piscirickettsiaceae; Hydrogenovibrio
GCF_000012645.1_ASM1264v1	WP_011375591.1	P	K	-	-	-	-	-	Bacteria; Terrabacteria group; Cyanobacteria/Melainabacteria group; Cyanobacteria; Synechococcales; Prochloraceae; Prochlorococcus
GCF_000012685.1_ASM1268v1	WP_011555720.1	P	K	+	-	-	+	-	Bacteria; Proteobacteria; delta/epsilon subdivisions; Deltaproteobacteria; Myxococcales; Cystobacterineae; Myxococcaceae; Myxococcus
GCF_000012725.1_ASM1272v1	WP_011314903.1	P	K	+	-	-	-	-	Bacteria; Proteobacteria; Alphaproteobacteria; Rhizobiales; Bradyrhizobiaceae; Nitrobacter
GCF_000012745.1_ASM1274v1	WP_011311369.1	S	R	-	-	+	-	-	Bacteria; Proteobacteria; Betaproteobacteria; Nitrosomonadales; Thiobacillaceae; Thiobacillus
GCF_000012765.1_ASM1276v1	WP_011387389.1	T	R	-	-	-	-	-	Bacteria; Terrabacteria group; Tenericutes; Mollicutes; Mycoplasmatales; Mycoplasmataceae; Mycoplasma; Mycoplasma mycoides group
GCF_000012805.1_ASM1280v1	WP_002812582.1	P	K	+	-	-	-	-	Bacteria; Proteobacteria; Gammaproteobacteria; Chromatiales; Chromatiaceae; Nitrosococcus
GCF_000012825.1_ASM1282v1	WP_005840678.1	P	K	-	-	-	-	-	Bacteria; FCB group; Bacteroidetes/Chlorobi group; Bacteroidetes; Bacteroidia; Bacteroidales; Bacteroidaceae
GCF_000012865.1_ASM1286v1	WP_011344766.1	P	K	-	-	-	-	-	Bacteria; Terrabacteria group; Firmicutes; Clostridia; Thermoanaerobacterales; Thermoanaerobacteraceae
GCF_000012885.1_ASM1288v1	WP_011342255.1	P	K	+	-	-	-	-	Bacteria; Proteobacteria; delta/epsilon subdivisions; Deltaproteobacteria; Desulfuromonadales; Desulfuromonadaceae; Pelobacter
GCF_000012925.1_ASM1292v1	WP_004512008.1	P	K	+	-	-	-	-	Bacteria; Proteobacteria; delta/epsilon subdivisions; Deltaproteobacteria; Desulfuromonadales; Geobacteraceae; Geobacter
GCF_000012965.1_ASM1296v1	WP_011372538.1	P	K	-	-	-	-	-	Bacteria; Proteobacteria; delta/epsilon subdivisions; Epsilonproteobacteria; Campylobacterales; Helicobacteraceae; Sulfurimonas
GCF_000012985.1_ASM1298v1	WP_011399132.1	P	K	+	+	-	-	-	Bacteria; Proteobacteria; Gammaproteobacteria; Oceanospirillales; Hahellaceae
GCF_000013125.1_ASM1312v1	WP_011450660.1	P	K	-	-	-	-	-	Bacteria; Proteobacteria; Alphaproteobacteria; Rickettsiales; Anaplasmataceae; Anaplasma; phagocytophilum group
GCF_000013325.1_ASM1332v1	WP_011445607.1	P	K	-	-	-	-	-	Bacteria; Proteobacteria; Alphaproteobacteria; Sphingomonadales; Sphingomonadaceae
GCF_000013345.1_ASM1334v1	WP_011437591.1	P	K	-	-	-	-	-	Bacteria; Terrabacteria group; Actinobacteria; Actinobacteria; Frankiales; Frankiaceae
GCF_000013365.1_ASM1336v1	WP_011441842.1	P	K	+	-	-	-	-	Bacteria; Proteobacteria; Alphaproteobacteria; Rhizobiales; Bradyrhizobiaceae; Rhodopseudomonas
GCF_000013405.1_ASM1340v1	WP_011416782.1	P	K	+	-	-	+	-	Bacteria; Proteobacteria; delta/epsilon subdivisions; Deltaproteobacteria; Syntrophobacterales; Syntrophaceae; Syntrophus
GCF_000013605.1_ASM1360v1	WP_011464532.1	G	R	-	-	+	-	-	Bacteria; Proteobacteria; Betaproteobacteria; Burkholderiales; Comamonadaceae; Rhodoferax
GCF_000013645.1_ASM1364v1	WP_011489376.1	S	R	-	-	+	-	-	Bacteria; Proteobacteria; Betaproteobacteria; Burkholderiales; Burkholderiaceae; Paraburkholderia
GCF_000013765.1_ASM1376v1	WP_011496431.1	S	R	-	-	+	-	-	Bacteria; Proteobacteria; Gammaproteobacteria; Alteromonadales; Shewanellaceae; Shewanella
GCF_000013885.1_ASM1388v1	WP_011510771.1	P	K	+	-	-	-	-	Bacteria; Proteobacteria; Alphaproteobacteria; Rhizobiales; Bradyrhizobiaceae; Nitrobacter
GCF_000014145.1_ASM1414v1	WP_011584917.1	P	N	-	-	-	+	-	Bacteria; FCB group; Bacteroidetes/Chlorobi group; Bacteroidetes; Cytophagia; Cytophagales; Cytophagaceae; Cytophaga
GCF_000014145.1_ASM1414v1	WP_011585867.1	P	K	-	-	-	+	-	Bacteria; FCB group; Bacteroidetes/Chlorobi group; Bacteroidetes; Cytophagia; Cytophagales; Cytophagaceae; Cytophaga
GCF_000014185.1_ASM1418v1	WP_011564437.1	P	K	-	-	-	-	-	Bacteria; Terrabacteria group; Actinobacteria; Rubrobacteria; Rubrobacterales; Rubrobacteraceae; Rubrobacter
GCF_000014225.1_ASM1422v1	WP_006992639.1	P	K	+	+	-	-	-	Bacteria; Proteobacteria; Gammaproteobacteria
GCF_000014285.2_ASM1428v2	WP_011631792.1	P	K	+	-	-	-	-	Bacteria; Proteobacteria; Alphaproteobacteria; Rhodospirillales; Acetobacteraceae; Granulibacter
GCF_000014385.1_ASM1438v1	WP_011677652.1	P	K	-	-	-	-	-	Bacteria; Terrabacteria group; Firmicutes; Bacilli; Lactobacillales; Leuconostocaceae; Oenococcus
GCF_000014425.1_ASM1442v1	WP_003646761.1	P	K	-	-	-	-	-	Bacteria; Terrabacteria group; Firmicutes; Bacilli; Lactobacillales; Lactobacillaceae; Lactobacillus
GCF_000014425.1_ASM1442v1	WP_003647540.1	P	K	-	-	-	-	-	Bacteria; Terrabacteria group; Firmicutes; Bacilli; Lactobacillales; Lactobacillaceae
GCF_000014445.1_ASM1444v1	WP_002815385.1	P	K	-	-	-	-	-	Bacteria; Terrabacteria group; Firmicutes; Bacilli; Lactobacillales; Leuconostocaceae; Leuconostoc
GCF_000014465.1_ASM1446v1	WP_011667704.1	P	K	-	-	-	-	-	Bacteria; Terrabacteria group; Firmicutes; Bacilli; Lactobacillales; Lactobacillaceae; Lactobacillus
GCF_000014505.1_ASM1450v1	WP_002833542.1	P	K	-	-	-	-	-	Bacteria; Terrabacteria group; Firmicutes; Bacilli; Lactobacillales; Lactobacillaceae; Pediococcus
GCF_000014505.1_ASM1450v1	WP_002834362.1	P	K	-	-	-	-	-	Bacteria; Terrabacteria group; Firmicutes; Bacilli; Lactobacillales; Lactobacillaceae; Pediococcus
GCF_000014565.1_ASM1456v1	WP_009480417.1	P	K	-	-	-	-	-	Bacteria; Terrabacteria group; Actinobacteria; Actinobacteria; Corynebacteriales; Nocardiaceae
GCF_000014705.1_ASM1470v1	WP_011637369.1	S	R	-	-	+	-	-	Bacteria; Proteobacteria; Gammaproteobacteria; Alteromonadales; Shewanellaceae
GCF_000014725.1_ASM1472v1	WP_011639985.1	P	K	-	-	-	-	-	Bacteria; Terrabacteria group; Firmicutes; Clostridia; Clostridiales; Syntrophomonadaceae; Syntrophomonas
GCF_000014765.1_ASM1476v1	WP_011634371.1	S	R	-	-	+	-	-	Bacteria; Proteobacteria; Betaproteobacteria; Nitrosomonadales; Nitrosomonadaceae; Nitrosomonas
GCF_000014785.1_ASM1478v1	WP_011628433.1	P	K	+	-	-	-	-	Bacteria; Proteobacteria; Gammaproteobacteria; Chromatiales; Ectothiorhodospiraceae; Alkalilimnicola
GCF_000014825.1_ASM1482v1	WP_011664344.1	P	K	+	-	-	-	-	Bacteria; Proteobacteria; Alphaproteobacteria; Rhizobiales; Bradyrhizobiaceae; Rhodopseudomonas
GCF_000014885.1_ASM1488v1	WP_020912710.1	S	R	-	-	+	-	-	Bacteria; Proteobacteria; Gammaproteobacteria; Alteromonadales; Shewanellaceae; Shewanella
GCF_000014925.1_ASM1492v1	WP_011774957.1	P	K	-	-	-	-	-	Bacteria; Terrabacteria group; Actinobacteria; Actinobacteria; Micrococcales
GCF_000015045.1_ASM1504v1	WP_011735652.1	P	K	+	-	-	-	-	Bacteria; Proteobacteria; delta/epsilon subdivisions; Deltaproteobacteria; Desulfuromonadales; Desulfuromonadaceae; Pelobacter
GCF_000015045.1_ASM1504v1	WP_011737113.1	P	A	+	-	-	-	-	Bacteria; Proteobacteria; delta/epsilon subdivisions; Deltaproteobacteria; Desulfuromonadales; Desulfuromonadaceae; Pelobacter
GCF_000015125.1_ASM1512v1	WP_011744144.1	P	N	-	-	-	+	-	Bacteria; FCB group; Bacteroidetes/Chlorobi group; Chlorobi; Chlorobia; Chlorobiales; Chlorobiaceae; Chlorobium/Pelodictyon group; Chlorobium
GCF_000015245.1_ASM1524v1	WP_011759813.1	S	R	-	-	+	-	-	Bacteria; Proteobacteria; Gammaproteobacteria; Alteromonadales; Shewanellaceae; Shewanella
GCF_000015285.1_ASM1528v1	WP_011771521.1	P	K	+	+	-	-	-	Bacteria; Proteobacteria; Gammaproteobacteria; Alteromonadales; Psychromonadaceae; Psychromonas
GCF_000015345.1_ASM1534v1	WP_012031610.1	P	K	+	-	-	-	-	Bacteria; Proteobacteria; Gammaproteobacteria; Cardiobacteriales; Cardiobacteriaceae; Dichelobacter
GCF_000015445.1_ASM1544v1	WP_005765956.1	P	K	-	-	-	-	-	Bacteria; Proteobacteria; Alphaproteobacteria; Rhizobiales; Bartonellaceae; Bartonella
GCF_000015565.1_ASM1556v1	WP_011810955.1	G	R	-	-	+	-	-	Bacteria; Proteobacteria; Betaproteobacteria; Burkholderiales; Comamonadaceae; Verminephrobacter
GCF_000015585.1_ASM1558v1	WP_011814765.1	P	K	+	-	-	-	-	Bacteria; Proteobacteria; Gammaproteobacteria; Chromatiales; Ectothiorhodospiraceae; Halorhodospira
GCF_000015665.1_ASM1566v1	WP_011819351.1	P	K	-	-	-	-	-	Bacteria; Terrabacteria group; Cyanobacteria/Melainabacteria group; Cyanobacteria; Synechococcales; Prochloraceae; Prochlorococcus
GCF_000016065.1_ASM1606v1	WP_011865713.1	S	R	-	-	+	-	-	Bacteria; Proteobacteria; Gammaproteobacteria; Alteromonadales; Shewanellaceae; Shewanella
GCF_000016085.1_ASM1608v1	WP_011890834.1	P	N	-	-	-	+	-	Bacteria; FCB group; Bacteroidetes/Chlorobi group; Chlorobi; Chlorobia; Chlorobiales; Chlorobiaceae; Chlorobium/Pelodictyon group; Chlorobium
GCF_000016165.1_ASM1616v1	WP_011877413.1	P	K	-	-	-	-	-	Bacteria; Terrabacteria group; Firmicutes; Clostridia; Clostridiales; Peptococcaceae; Desulfotomaculum
GCF_000016185.1_ASM1618v1	WP_012567011.1	P	K	+	-	-	-	-	Bacteria; Proteobacteria; Alphaproteobacteria; Rhodospirillales; Rhodospirillaceae; Rhodospirillum
GCF_000016285.1_ASM1628v1	WP_012654285.1	P	K	+	-	-	-	-	Bacteria; Proteobacteria; Alphaproteobacteria; Rhizobiales; Rhizobiaceae; Rhizobium/Agrobacterium group; Agrobacterium
GCF_000016345.1_ASM1634v1	WP_011902258.1	S	R	-	-	+	-	-	Bacteria; Proteobacteria; Betaproteobacteria; Burkholderiales; Burkholderiaceae; Polynucleobacter
GCF_000016405.1_ASM1640v1	WP_011909363.1	P	K	+	-	-	-	-	Bacteria; Proteobacteria; Alphaproteobacteria; Rhodobacterales; Rhodobacteraceae
GCF_000016425.1_ASM1642v1	WP_011905742.1	P	K	-	-	-	-	-	Bacteria; Terrabacteria group; Actinobacteria; Actinobacteria; Micromonosporales; Micromonosporaceae
GCF_000016545.1_ASM1654v1	WP_011916839.1	P	K	-	-	-	-	-	Bacteria; Terrabacteria group; Firmicutes; Clostridia; Thermoanaerobacterales; Thermoanaerobacterales Family III. Incertae Sedis
GCF_000016645.1_ASM1664v1	WP_012024960.1	P	K	-	-	-	+	-	Bacteria; FCB group; Bacteroidetes/Chlorobi group; Bacteroidetes; Flavobacteriia; Flavobacteriales; Flavobacteriaceae
GCF_000016745.1_ASM1674v1	WP_011939036.1	P	K	+	-	-	-	-	Bacteria; Proteobacteria; delta/epsilon subdivisions; Deltaproteobacteria; Desulfuromonadales; Geobacteraceae; Geobacter
GCF_000016765.1_ASM1676v1	WP_012049180.1	P	K	-	-	-	+	-	Bacteria; Proteobacteria; Alphaproteobacteria; Sphingomonadales; Sphingomonadaceae
GCF_000016825.1_ASM1682v1	WP_003664757.1	P	K	-	-	-	-	-	Bacteria; Terrabacteria group; Firmicutes; Bacilli; Lactobacillales; Lactobacillaceae
GCF_000016985.1_ASM1698v1	WP_012063618.1	P	K	-	-	-	-	-	Bacteria; Terrabacteria group; Firmicutes; Clostridia; Clostridiales; Clostridiaceae; Alkaliphilus
GCF_000017005.1_ASM1700v1	WP_009754238.1	P	K	-	-	-	-	-	Bacteria; Terrabacteria group; Firmicutes; Bacilli; Lactobacillales; Streptococcaceae
GCF_000017245.1_ASM1724v1	WP_012073827.1	P	K	+	+	-	-	-	Bacteria; Proteobacteria; Gammaproteobacteria; Pasteurellales; Pasteurellaceae; Actinobacillus
GCF_000017265.1_ASM1726v1	WP_012523218.1	P	K	+	-	-	+	-	Bacteria; Proteobacteria; Alphaproteobacteria; Caulobacterales; Caulobacteraceae; Phenylobacterium
GCF_000017305.1_ASM1730v1	WP_041292215.1	P	K	-	-	-	-	-	Bacteria; Terrabacteria group; Actinobacteria; Actinobacteria; Kineosporiales; Kineosporiaceae; Kineococcus
GCF_000017405.1_ASM1740v1	WP_010661385.1	P	K	-	-	-	-	-	Bacteria; Proteobacteria; Alphaproteobacteria; Rhizobiales; Brucellaceae
GCF_000017565.1_ASM1756v1	WP_012111020.1	P	K	-	-	-	-	-	Bacteria; Proteobacteria; Alphaproteobacteria; Rhizobiales; Rhodobiaceae; Parvibaculum
GCF_000017645.1_ASM1764v1	WP_012114551.1	P	K	+	-	-	-	-	Bacteria; Proteobacteria; Alphaproteobacteria; Rhizobiales; Xanthobacteraceae; Xanthobacter
GCF_000017685.1_ASM1768v1	WP_012476671.1	P	K	+	-	-	-	-	Bacteria; Spirochaetes; Spirochaetia; Leptospirales; Leptospiraceae; Leptospira
GCF_000017705.1_ASM1770v1	WP_005425036.1	P	K	+	+	-	-	-	Bacteria; Proteobacteria; Gammaproteobacteria; Vibrionales; Vibrionaceae
GCF_000017805.1_ASM1780v1	WP_012120039.1	P	N	-	-	-	+	-	Bacteria; Terrabacteria group; Chloroflexi; Chloroflexia; Chloroflexales; Roseiflexineae; Roseiflexaceae; Roseiflexus
GCF_000017865.1_ASM1786v1	WP_012003542.1	M	M	-	-	-	-	-	Bacteria; Thermotogae; Thermotogae; Thermotogales; Thermotogaceae
GCF_000018025.1_ASM1802v1	WP_012142683.1	S	R	-	-	+	-	-	Bacteria; Proteobacteria; Gammaproteobacteria; Alteromonadales; Shewanellaceae; Shewanella
GCF_000018105.1_ASM1810v1	WP_010475096.1	P	K	-	-	-	-	-	Bacteria; Terrabacteria group; Cyanobacteria/Melainabacteria group; Cyanobacteria; Synechococcales; Acaryochloridaceae
GCF_000018205.1_ASM1820v1	WP_012149295.1	P	K	-	-	-	-	-	Bacteria; Proteobacteria; Alphaproteobacteria; Rickettsiales; Rickettsiaceae; Rickettsieae; Rickettsia; spotted fever group
GCF_000018285.1_ASM1828v1	WP_012155285.1	S	R	-	-	+	-	-	Bacteria; Proteobacteria; Gammaproteobacteria; Alteromonadales; Shewanellaceae
GCF_000018405.1_ASM1840v1	WP_012175774.1	P	K	+	-	-	-	-	Bacteria; Proteobacteria; delta/epsilon subdivisions; Deltaproteobacteria; Desulfobacterales; Desulfobacteraceae; Desulfococcus
GCF_000018685.1_ASM1868v1	WP_012200543.1	P	K	-	-	-	-	-	Bacteria; Terrabacteria group; Firmicutes; Clostridia; Clostridiales; Lachnospiraceae; Lachnoclostridium
GCF_000018785.1_ASM1878v1	WP_012242822.1	T	R	-	-	-	-	-	Bacteria; Terrabacteria group; Tenericutes; Mollicutes; Acholeplasmatales; Acholeplasmataceae; Acholeplasma
GCF_000018885.1_ASM1888v1	WP_041685476.1	P	K	-	-	-	-	-	Bacteria; Terrabacteria group; Actinobacteria; Actinobacteria; Micrococcales; Micrococcaceae; Renibacterium
GCF_000019225.1_ASM1922v1	WP_012487751.1	S	R	-	-	+	-	-	Bacteria; Proteobacteria; Gammaproteobacteria; Cellvibrionales; Cellvibrionaceae; Cellvibrio
GCF_000019345.1_ASM1934v1	WP_006688853.1	T	M	-	-	-	-	-	Bacteria; Terrabacteria group; Tenericutes; Mollicutes; Mycoplasmatales; Mycoplasmataceae; Ureaplasma
GCF_000019405.1_ASM1940v1	WP_011609443.1	P	K	+	+	-	-	-	Bacteria; Proteobacteria; Gammaproteobacteria; Pasteurellales; Pasteurellaceae; Histophilus
GCF_000019585.2_ASM1958v2	WP_002802373.1	P	K	+	-	-	-	-	Bacteria; Proteobacteria; Gammaproteobacteria; Xanthomonadales; Xanthomonadaceae
GCF_000019665.1_ASM1966v1	WP_012463001.1	P	N	-	-	-	+	-	Bacteria; PVC group; Verrucomicrobia; Methylacidiphilae; Methylacidiphilales; Methylacidiphilaceae; Methylacidiphilum
GCF_000019685.1_ASM1968v1	WP_012537980.1	M	R	-	-	-	-	-	Bacteria; Spirochaetes; Spirochaetia; Spirochaetales; Borreliaceae; Borrelia
GCF_000019725.1_ASM1972v1	WP_012319691.1	P	K	+	-	-	-	-	Bacteria; Proteobacteria; Alphaproteobacteria; Rhizobiales; Methylobacteriaceae
GCF_000019845.1_ASM1984v1	WP_012386125.1	P	K	-	-	-	-	-	Bacteria; Proteobacteria; Alphaproteobacteria; Rhizobiales; Beijerinckiaceae; Beijerinckia
GCF_000019845.1_ASM1984v1	WP_012386133.1	P	K	-	-	-	-	-	Bacteria; Proteobacteria; Alphaproteobacteria; Rhizobiales; Beijerinckiaceae; Beijerinckia
GCF_000019945.1_ASM1994v1	WP_012455063.1	P	K	+	-	-	-	-	Bacteria; Proteobacteria; Alphaproteobacteria; Rhizobiales; Methylobacteriaceae; Methylorubrum
GCF_000019965.1_ASM1996v1	WP_012375392.1	P	N	-	-	-	+	-	Bacteria; PVC group; Verrucomicrobia; Opitutae; Opitutales; Opitutaceae; Opitutus
GCF_000020005.1_ASM2000v1	WP_012448158.1	P	K	-	-	-	-	-	Bacteria; Terrabacteria group; Firmicutes; Clostridia; Natranaerobiales; Natranaerobiaceae; Natranaerobius
GCF_000020025.1_ASM2002v1	WP_012407245.1	P	K	-	-	-	+	-	Bacteria; Terrabacteria group; Cyanobacteria/Melainabacteria group; Cyanobacteria; Nostocales; Nostocaceae; Nostoc
GCF_000020045.1_ASM2004v1	WP_012400257.1	S	R	-	-	+	-	-	Bacteria; Proteobacteria; Betaproteobacteria; Burkholderiales; Burkholderiaceae
GCF_000020065.1_ASM2006v1	WP_012498135.1	Q	R	-	-	-	-	-	Bacteria; Terrabacteria group; Tenericutes; Mollicutes; Mycoplasmatales; Mycoplasmataceae; Mycoplasma
GCF_000020145.1_ASM2014v1	WP_012414903.1	K	Q	-	-	-	+	-	Bacteria; Elusimicrobia; Elusimicrobia; Elusimicrobiales; Elusimicrobiaceae; Elusimicrobium
GCF_000020165.1_ASM2016v1	WP_003372195.1	P	K	+	-	-	-	-	Bacteria; Terrabacteria group; Firmicutes; Clostridia; Clostridiales; Clostridiaceae
GCF_000020225.1_ASM2022v1	WP_012419922.1	P	R	-	-	-	-	-	Bacteria; PVC group; Verrucomicrobia; Verrucomicrobiae; Verrucomicrobiales; Akkermansiaceae; Akkermansia
GCF_000020305.1_ASM2030v1	WP_010264096.1	P	K	-	-	-	-	-	Bacteria; Proteobacteria; Alphaproteobacteria; Rickettsiales; Anaplasmataceae
GCF_000020365.1_ASM2036v1	WP_015903775.1	P	K	+	-	-	-	-	Bacteria; Proteobacteria; delta/epsilon subdivisions; Deltaproteobacteria; Desulfobacterales; Desulfobacteraceae; Desulfobacterium
GCF_000020385.1_ASM2038v1	WP_012468766.1	P	A	+	-	-	-	-	Bacteria; Proteobacteria; delta/epsilon subdivisions; Deltaproteobacteria; Desulfuromonadales; Geobacteraceae; Geobacter
GCF_000020385.1_ASM2038v1	WP_012469968.1	P	K	+	-	-	-	-	Bacteria; Proteobacteria; delta/epsilon subdivisions; Deltaproteobacteria; Desulfuromonadales; Geobacteraceae; Geobacter
GCF_000020465.1_ASM2046v1	WP_012465180.1	P	N	-	-	-	+	-	Bacteria; FCB group; Bacteroidetes/Chlorobi group; Chlorobi; Chlorobia; Chlorobiales; Chlorobiaceae; Chlorobium/Pelodictyon group; Chlorobium
GCF_000020485.1_ASM2048v1	WP_012635560.1	T	R	-	-	-	-	-	Bacteria; Terrabacteria group; Firmicutes; Clostridia; Halanaerobiales; Halanaerobiaceae; Halothermothrix
GCF_000020505.1_ASM2050v1	WP_012503104.1	P	N	-	-	-	+	-	Bacteria; FCB group; Bacteroidetes/Chlorobi group; Chlorobi; Chlorobia; Chlorobiales; Chlorobiaceae; Chlorobaculum
GCF_000020545.1_ASM2054v1	WP_041471442.1	P	N	-	-	-	+	-	Bacteria; FCB group; Bacteroidetes/Chlorobi group; Chlorobi; Chlorobia; Chlorobiales; Chlorobiaceae; Chlorobium/Pelodictyon group; Chlorobium
GCF_000020645.1_ASM2064v1	WP_012509306.1	P	N	-	-	-	+	-	Bacteria; FCB group; Bacteroidetes/Chlorobi group; Chlorobi; Chlorobia; Chlorobiales; Chlorobiaceae; Chlorobium/Pelodictyon group; Pelodictyon
GCF_000020725.1_ASM2072v1	WP_012528852.1	P	A	+	-	-	+	-	Bacteria; Proteobacteria; delta/epsilon subdivisions; Deltaproteobacteria; Desulfuromonadales; Geobacteraceae; Geobacter
GCF_000020725.1_ASM2072v1	WP_012530489.1	P	K	+	-	-	+	-	Bacteria; Proteobacteria; delta/epsilon subdivisions; Deltaproteobacteria; Desulfuromonadales; Geobacteraceae
GCF_000021025.1_ASM2102v1	WP_012696195.1	S	R	-	-	+	-	-	Bacteria; Proteobacteria; Betaproteobacteria; Neisseriales; Chromobacteriaceae; Laribacter
GCF_000021345.1_ASM2134v1	WP_003589676.1	P	K	+	-	-	-	-	Bacteria; Proteobacteria; Alphaproteobacteria; Rhizobiales; Rhizobiaceae; Rhizobium/Agrobacterium group
GCF_000021385.1_ASM2138v1	WP_012611523.1	P	K	-	-	-	-	-	Bacteria; Proteobacteria; delta/epsilon subdivisions; Deltaproteobacteria; Desulfovibrionales; Desulfovibrionaceae; Desulfovibrio
GCF_000021485.1_ASM2148v1	WP_012536394.1	P	K	-	-	-	-	-	Bacteria; Proteobacteria; Acidithiobacillia; Acidithiobacillales; Acidithiobacillaceae; Acidithiobacillus
GCF_000021545.1_ASM2154v1	WP_012673980.1	P	K	+	-	-	-	-	Bacteria; Aquificae; Aquificae; Aquificales; Hydrogenothermaceae; Sulfurihydrogenibium
GCF_000021685.1_ASM2168v1	WP_015922641.1	M	R	-	-	-	-	-	Bacteria; Terrabacteria group; Chloroflexi; Thermomicrobia; Thermomicrobiales; Thermomicrobiaceae; Thermomicrobium
GCF_000021725.1_ASM2172v1	WP_015902142.1	P	K	-	-	-	-	-	Bacteria; Proteobacteria; delta/epsilon subdivisions; Epsilonproteobacteria; Nautiliales; Nautiliaceae; Nautilia
GCF_000021745.1_ASM2174v1	WP_012589499.1	P	K	+	-	-	-	-	Bacteria; Proteobacteria; Alphaproteobacteria; Rhizobiales; Beijerinckiaceae; Methylocella
GCF_000021745.1_ASM2174v1	WP_012592661.1	P	K	+	-	-	-	-	Bacteria; Proteobacteria; Alphaproteobacteria; Rhizobiales; Beijerinckiaceae; Methylocella
GCF_000021865.1_ASM2186v1	WP_013068380.1	P	K	+	-	-	-	-	Bacteria; Proteobacteria; Alphaproteobacteria; Rhodobacterales; Rhodobacteraceae; Rhodobacter
GCF_000021885.1_ASM2188v1	WP_005713863.1	P	K	+	+	-	-	-	Bacteria; Proteobacteria; Gammaproteobacteria; Pasteurellales; Pasteurellaceae; Glaesserella
GCF_000021925.1_ASM2192v1	WP_015944633.1	P	K	-	-	-	-	-	Bacteria; Terrabacteria group; Firmicutes; Clostridia; Clostridiales; Peptococcaceae; Desulfitobacterium
GCF_000021945.1_ASM2194v1	WP_012616332.1	P	N	-	-	-	+	-	Bacteria; Terrabacteria group; Chloroflexi; Chloroflexia; Chloroflexales; Chloroflexineae; Chloroflexaceae; Chloroflexus
GCF_000021985.1_ASM2198v1	WP_012637801.1	P	K	+	-	-	-	-	Bacteria; Proteobacteria; Gammaproteobacteria; Chromatiales; Ectothiorhodospiraceae; Thioalkalivibrio
GCF_000022025.1_ASM2202v1	WP_015937199.1	P	K	-	-	-	-	-	Bacteria; Terrabacteria group; Actinobacteria; Actinobacteria; Micrococcales; Micrococcaceae; Pseudarthrobacter
GCF_000022085.1_ASM2208v1	WP_015928564.1	P	K	+	-	-	-	-	Bacteria; Proteobacteria; Alphaproteobacteria; Rhizobiales; Methylobacteriaceae; Methylobacterium
GCF_000022145.1_ASM2214v1	WP_012524751.1	P	K	-	-	-	+	-	Bacteria; Proteobacteria; delta/epsilon subdivisions; Deltaproteobacteria; Myxococcales; Cystobacterineae; Anaeromyxobacteraceae
GCF_000022265.1_ASM2226v1	WP_012647860.1	P	K	+	-	-	-	-	Bacteria; Proteobacteria; delta/epsilon subdivisions; Deltaproteobacteria; Desulfuromonadales; Geobacteraceae; Geobacter
GCF_000022325.1_ASM2232v1	WP_013402574.1	P	K	-	-	-	-	-	Bacteria; Terrabacteria group; Firmicutes; Clostridia; Thermoanaerobacterales; Thermoanaerobacterales Family III. Incertae Sedis
GCF_000022525.1_ASM2252v1	WP_015816079.1	P	K	-	-	-	-	-	Bacteria; Proteobacteria; Alphaproteobacteria; Rickettsiales; Anaplasmataceae; Neorickettsia
GCF_000022565.1_ASM2256v1	WP_015897933.1	P	N	-	-	-	+	-	Bacteria; Acidobacteria; Acidobacteriia; Acidobacteriales; Acidobacteriaceae; Acidobacterium
GCF_000022725.1_ASM2272v1	WP_015856958.1	P	K	-	-	-	-	-	Bacteria; Proteobacteria; Alphaproteobacteria; Rhizobiales; Bartonellaceae; Bartonella
GCF_000022905.1_ASM2290v1	WP_010190126.1	P	K	-	-	-	-	-	Bacteria; Terrabacteria group; Actinobacteria; Actinobacteria; Corynebacteriales; Corynebacteriaceae; Corynebacterium
GCF_000023025.1_ASM2302v1	WP_015818878.1	P	K	+	+	-	-	-	Bacteria; Proteobacteria; Gammaproteobacteria; Cellvibrionales; Cellvibrionaceae; Teredinibacter
GCF_000023065.1_ASM2306v1	WP_015880184.1	S	R	-	-	+	-	-	Bacteria; Proteobacteria; Gammaproteobacteria; Aeromonadales; Aeromonadaceae; Tolumonas
GCF_000023105.1_ASM2310v1	WP_015882526.1	P	K	-	-	-	-	-	Bacteria; Terrabacteria group; Actinobacteria; Actinobacteria; Micrococcales; Beutenbergiaceae; Beutenbergia
GCF_000023125.1_ASM2312v1	WP_015813596.1	P	K	-	-	-	-	-	Bacteria; FCB group; Bacteroidetes/Chlorobi group; Bacteroidetes; Cytophagia; Cytophagales; Cytophagaceae
GCF_000023145.1_ASM2314v1	WP_012731637.1	P	K	-	-	-	-	-	Bacteria; Terrabacteria group; Actinobacteria; Actinobacteria; Corynebacteriales; Corynebacteriaceae; Corynebacterium
GCF_000023245.1_ASM2324v1	WP_015803955.1	P	K	-	-	-	-	-	Bacteria; Terrabacteria group; Actinobacteria; Actinobacteria; Pseudonocardiales; Pseudonocardiaceae
GCF_000023265.1_ASM2326v1	WP_015799108.1	P	K	-	-	-	-	-	Bacteria; Terrabacteria group; Actinobacteria; Acidimicrobiia; Acidimicrobiales; Acidimicrobiaceae; Acidimicrobium
GCF_000023325.1_ASM2332v1	WP_015869435.1	T	R	+	-	-	-	-	Bacteria; Thermotogae; Thermotogae; Kosmotogales; Kosmotogaceae
GCF_000023465.1_ASM2346v1	WP_013071792.1	P	K	-	-	-	+	-	Bacteria; FCB group; Bacteroidetes/Chlorobi group; Bacteroidetes; Flavobacteriia; Flavobacteriales; Flavobacteriaceae
GCF_000023605.1_ASM2360v1	WP_015841891.1	P	K	+	+	-	-	-	Bacteria; Proteobacteria; Gammaproteobacteria; Enterobacterales; Pectobacteriaceae; Pectobacterium
GCF_000023705.1_ASM2370v1	WP_015832369.1	S	R	-	-	+	-	-	Bacteria; Proteobacteria; Betaproteobacteria; Nitrosomonadales; Methylophilaceae; Methylotenera
GCF_000023745.1_ASM2374v1	WP_013442094.1	S	R	-	-	+	-	-	Bacteria; Proteobacteria; Betaproteobacteria; Nitrosomonadales; Methylophilaceae
GCF_000023785.1_ASM2378v1	WP_012777891.1	P	K	+	-	-	-	-	Bacteria; Proteobacteria; Alphaproteobacteria; Rhodobacterales; Hyphomonadaceae; Hirschia
GCF_000023825.1_ASM2382v1	WP_015810074.1	P	N	-	-	-	+	-	Bacteria; FCB group; Bacteroidetes/Chlorobi group; Bacteroidetes; Sphingobacteriia; Sphingobacteriales; Sphingobacteriaceae; Pedobacter
GCF_000023845.1_ASM2384v1	WP_012802927.1	P	K	-	-	-	-	-	Bacteria; Terrabacteria group; Actinobacteria; Coriobacteriia; Eggerthellales; Eggerthellaceae; Cryptobacterium
GCF_000023865.1_ASM2386v1	WP_015785901.1	P	K	-	-	-	-	-	Bacteria; Terrabacteria group; Actinobacteria; Actinobacteria; Pseudonocardiales; Pseudonocardiaceae; Saccharomonospora
GCF_000023885.1_ASM2388v1	WP_083762217.1	P	K	-	-	-	-	-	Bacteria; Terrabacteria group; Actinobacteria; Coriobacteriia; Eggerthellales; Eggerthellaceae; Slackia
GCF_000023925.1_ASM2392v1	WP_041291340.1	P	K	-	-	-	-	-	Bacteria; Terrabacteria group; Actinobacteria; Actinobacteria; Micrococcales; Dermacoccaceae; Kytococcus
GCF_000024025.1_ASM2402v1	WP_012786604.1	P	K	-	-	-	-	-	Bacteria; Terrabacteria group; Actinobacteria; Actinobacteria; Catenulisporales; Catenulisporaceae; Catenulispora
GCF_000024105.1_ASM2410v1	WP_015777965.1	P	K	-	-	-	-	-	Bacteria; Terrabacteria group; Firmicutes; Tissierellia; Tissierellales; Peptoniphilaceae
GCF_000024125.1_ASM2412v1	WP_015755000.1	P	K	-	-	-	+	-	Bacteria; FCB group; Bacteroidetes/Chlorobi group; Bacteroidetes; Flavobacteriia; Flavobacteriales; Flavobacteriaceae; Robiginitalea
GCF_000024205.1_ASM2420v1	WP_015758166.1	P	K	-	-	-	-	-	Bacteria; Terrabacteria group; Firmicutes; Clostridia; Clostridiales; Peptococcaceae; Desulfofarcimen
GCF_000024225.1_ASM2422v1	WP_012808557.1	P	K	-	-	-	-	-	Bacteria; Terrabacteria group; Actinobacteria; Coriobacteriia; Coriobacteriales; Atopobiaceae
GCF_000024265.1_ASM2426v1	WP_009306665.1	P	K	-	-	-	-	-	Bacteria; Terrabacteria group; Actinobacteria; Coriobacteriia; Eggerthellales; Eggerthellaceae
GCF_000024285.1_ASM2428v1	WP_012811098.1	P	K	-	-	-	-	-	Bacteria; Terrabacteria group; Firmicutes; Bacilli; Bacillales; Alicyclobacillaceae; Alicyclobacillus
GCF_000024325.1_ASM2432v1	WP_015751736.1	P	K	-	-	-	+	-	Bacteria; Proteobacteria; delta/epsilon subdivisions; Deltaproteobacteria; Desulfovibrionales; Desulfohalobiaceae; Desulfohalobium
GCF_000024345.1_ASM2434v1	WP_012921937.1	P	K	-	-	-	-	-	Bacteria; Terrabacteria group; Actinobacteria; Actinobacteria; Propionibacteriales; Nocardioidaceae; Kribbella
GCF_000024365.1_ASM2436v1	WP_015749396.1	P	K	-	-	-	-	-	Bacteria; Terrabacteria group; Actinobacteria; Actinobacteria; Nakamurellales; Nakamurellaceae; Nakamurella
GCF_000024385.1_ASM2438v1	WP_012853269.1	P	K	-	-	-	-	-	Bacteria; Terrabacteria group; Actinobacteria; Actinobacteria; Streptosporangiales; Thermomonosporaceae; Thermomonospora
GCF_000024425.1_ASM2442v1	WP_013013806.1	I	R	-	-	-	+	-	Bacteria; Terrabacteria group; Deinococcus-Thermus; Deinococci; Thermales; Thermaceae; Meiothermus
GCF_000024505.1_ASM2450v1	WP_012880818.1	P	K	-	-	-	-	-	Bacteria; Proteobacteria; Alphaproteobacteria; Rickettsiales; Anaplasmataceae; Anaplasma
GCF_000024545.1_ASM2454v1	WP_013018387.1	P	K	-	-	-	-	-	Bacteria; Terrabacteria group; Actinobacteria; Actinobacteria; Glycomycetales; Glycomycetaceae; Stackebrandtia
GCF_000024605.1_ASM2460v1	WP_015738689.1	P	K	-	-	-	-	-	Bacteria; Terrabacteria group; Firmicutes; Clostridia; Thermoanaerobacterales; Thermoanaerobacteraceae; Moorella group; Ammonifex
GCF_000024725.1_ASM2472v1	WP_013031661.1	P	K	+	-	-	-	-	Bacteria; Proteobacteria; Gammaproteobacteria; Chromatiales; Chromatiaceae; Nitrosococcus
GCF_000024765.1_ASM2476v1	WP_012823455.1	S	R	-	-	+	-	-	Bacteria; Proteobacteria; Gammaproteobacteria; Chromatiales; Halothiobacillaceae; Halothiobacillus
GCF_000024845.1_ASM2484v1	WP_012843183.1	P	K	-	-	-	-	-	Bacteria; FCB group; Bacteroidetes/Chlorobi group; Bacteroidetes; Bacteroidetes Order II. Incertae sedis; Rhodothermaceae; Rhodothermus
GCF_000024865.1_ASM2486v1	WP_012889555.1	P	K	+	-	-	-	-	Bacteria; Terrabacteria group; Actinobacteria; Actinobacteria; Streptosporangiales; Streptosporangiaceae; Streptosporangium
GCF_000024885.1_ASM2488v1	WP_012856424.1	P	K	-	-	-	-	-	Bacteria; Proteobacteria; delta/epsilon subdivisions; Epsilonproteobacteria; Campylobacterales; Campylobacteraceae
GCF_000024925.1_ASM2492v1	WP_012866787.1	P	K	-	-	-	-	-	Bacteria; Terrabacteria group; Actinobacteria; Actinobacteria; Micrococcales; Sanguibacteraceae; Sanguibacter
GCF_000025065.1_ASM2506v1	WP_012886311.1	P	K	+	+	-	-	-	Bacteria; Proteobacteria; Gammaproteobacteria; Enterobacterales; Pectobacteriaceae; Dickeya
GCF_000025085.1_ASM2508v1	WP_002459030.1	P	K	-	-	-	-	-	Bacteria; Terrabacteria group; Firmicutes; Bacilli; Bacillales; Staphylococcaceae
GCF_000025205.1_ASM2520v1	WP_012914265.1	P	K	-	-	-	-	-	Bacteria; Terrabacteria group; Actinobacteria; Actinobacteria; Bifidobacteriales; Bifidobacteriaceae; Gardnerella
GCF_000025265.1_ASM2526v1	WP_012934542.1	P	K	-	-	-	-	-	Bacteria; Terrabacteria group; Actinobacteria; Thermoleophilia; Solirubrobacterales; Conexibacteraceae; Conexibacter
GCF_000025305.1_ASM2530v1	WP_012938276.1	P	K	-	-	-	-	-	Bacteria; Terrabacteria group; Firmicutes; Negativicutes; Acidaminococcales; Acidaminococcaceae; Acidaminococcus
GCF_000025345.1_ASM2534v1	WP_012949184.1	P	K	-	-	-	-	-	Bacteria; Terrabacteria group; Actinobacteria; Actinobacteria; Geodermatophilales; Geodermatophilaceae; Geodermatophilus
GCF_000025405.2_ASM2540v1	WP_013024304.1	P	K	+	+	-	-	-	Bacteria; Proteobacteria; Gammaproteobacteria; Enterobacterales; Erwiniaceae
GCF_000025645.1_ASM2564v1	WP_012995141.1	P	K	-	-	-	-	-	Bacteria; Terrabacteria group; Firmicutes; Clostridia; Thermoanaerobacterales; Thermoanaerobacteraceae
GCF_000025725.1_ASM2572v1	WP_013009418.1	C	R	-	-	-	-	-	Bacteria; Deferribacteres; Deferribacteres; Deferribacterales; Deferribacteraceae; Denitrovibrio
GCF_000025845.1_ASM2584v1	WP_013054765.1	Q	R	-	-	-	-	-	Bacteria; Terrabacteria group; Tenericutes; Mollicutes; Mycoplasmatales; Mycoplasmataceae; Mycoplasma
GCF_000025905.1_ASM2590v1	WP_013044336.1	Q	R	-	-	-	-	-	Bacteria; PVC group; Verrucomicrobia; Opitutae; Puniceicoccales; Puniceicoccaceae; Coraliomargarita
GCF_000025925.1_ASM2592v1	WP_013064453.1	P	K	-	-	-	-	-	Bacteria; FCB group; Bacteroidetes/Chlorobi group; Bacteroidetes; Bacteroidia; Bacteroidales; Prevotellaceae
GCF_000025945.1_ASM2594v1	WP_011188090.1	P	K	+	-	-	-	-	Bacteria; Proteobacteria; delta/epsilon subdivisions; Deltaproteobacteria; Desulfobacterales; Desulfobulbaceae; Desulfotalea
GCF_000026125.1_ASM2612v1	WP_011870507.1	S	R	-	-	+	-	+	Bacteria; Proteobacteria; Betaproteobacteria; Burkholderiales; Oxalobacteraceae; Herminiimonas
GCF_000026405.1_ASM2640v1	WP_004902581.1	P	K	-	-	-	-	-	Bacteria; Terrabacteria group; Firmicutes; Bacilli; Lactobacillales; Leuconostocaceae; Leuconostoc
GCF_000046685.1_ASM4668v1	WP_011179826.1	P	K	-	-	-	-	-	Bacteria; Proteobacteria; Alphaproteobacteria; Rhizobiales; Bartonellaceae; Bartonella
GCF_000046705.1_ASM4670v1	WP_011181270.1	P	K	-	-	-	-	-	Bacteria; Proteobacteria; Alphaproteobacteria; Rhizobiales; Bartonellaceae; Bartonella
GCF_000055785.1_ASM5578v1	WP_011507824.1	P	K	+	+	-	-	-	Bacteria; Proteobacteria; Gammaproteobacteria; Oceanospirillales; Halomonadaceae
GCF_000055945.1_ASM5594v1	WP_011526150.1	P	K	-	-	-	-	-	Bacteria; Proteobacteria; delta/epsilon subdivisions; Deltaproteobacteria; Desulfovibrionales; Desulfovibrionaceae; Lawsonia
GCF_000056065.1_ASM5606v1	WP_011544049.1	P	K	-	-	-	-	-	Bacteria; Terrabacteria group; Firmicutes; Bacilli; Lactobacillales; Lactobacillaceae; Lactobacillus
GCF_000056065.1_ASM5606v1	WP_011544224.1	P	K	-	-	-	-	-	Bacteria; Terrabacteria group; Firmicutes; Bacilli; Lactobacillales; Lactobacillaceae; Lactobacillus
GCF_000058485.1_ASM5848v1	WP_009742786.1	P	K	-	-	-	-	-	Bacteria; Terrabacteria group; Actinobacteria; Actinobacteria; Frankiales; Frankiaceae
GCF_000060345.1_ASM6034v1	WP_011709651.1	P	K	-	-	-	+	-	Bacteria; FCB group; Bacteroidetes/Chlorobi group; Bacteroidetes; Flavobacteriia; Flavobacteriales; Flavobacteriaceae; Gramella
GCF_000062885.1_ASM6288v1	WP_009943045.1	P	K	-	-	-	-	-	Bacteria; Terrabacteria group; Actinobacteria; Actinobacteria; Pseudonocardiales; Pseudonocardiaceae; Saccharopolyspora
GCF_000063545.1_ASM6354v1	WP_011944714.1	P	K	-	-	-	-	-	Bacteria; Proteobacteria; Alphaproteobacteria; Rickettsiales; Rickettsiaceae; Rickettsieae; Orientia
GCF_000063605.1_ASM6360v1	WP_004024464.1	Q	R	+	-	-	-	-	Bacteria; Terrabacteria group; Tenericutes; Mollicutes; Mycoplasmatales; Mycoplasmataceae
GCF_000067165.1_ASM6716v1	WP_012241842.1	P	K	+	-	-	+	-	Bacteria; Proteobacteria; delta/epsilon subdivisions; Deltaproteobacteria; Myxococcales; Sorangiineae; Polyangiaceae; Sorangium
GCF_000067205.1_ASM6720v1	WP_012250266.1	S	R	-	-	+	-	-	Bacteria; Proteobacteria; Betaproteobacteria; Burkholderiales; Alcaligenaceae; Bordetella
GCF_000069945.1_ASM6994v1	WP_012360211.1	P	K	-	-	-	-	-	Bacteria; Terrabacteria group; Actinobacteria; Actinobacteria; Corynebacteriales; Corynebacteriaceae; Corynebacterium
GCF_000069965.1_ASM6996v1	WP_004245698.1	P	K	+	+	-	-	-	Bacteria; Proteobacteria; Gammaproteobacteria; Enterobacterales; Morganellaceae
GCF_000070465.1_ASM7046v1	WP_012418174.1	S	R	-	-	+	-	-	Bacteria; Proteobacteria; Betaproteobacteria; Burkholderiales; Alcaligenaceae; Bordetella
GCF_000090965.1_ASM9096v1	WP_011672416.1	P	K	-	-	-	-	-	Bacteria; Proteobacteria; Gammaproteobacteria; Enterobacterales; Erwiniaceae; Buchnera
GCF_000091305.1_ASM9130v1	WP_005485474.1	P	K	-	-	-	-	-	Bacteria; Terrabacteria group; Actinobacteria; Actinobacteria; Streptomycetales; Streptomycetaceae
GCF_000091325.1_ASM9132v1	WP_013051306.1	S	R	-	-	-	-	-	Bacteria; Proteobacteria; Gammaproteobacteria; Alteromonadales; Shewanellaceae; Shewanella
GCF_000091465.1_ASM9146v1	WP_009847919.1	P	K	+	+	-	-	-	Bacteria; Proteobacteria; Gammaproteobacteria; Vibrionales; Vibrionaceae
GCF_000091565.1_ASM9156v1	WP_004160177.1	P	K	+	+	-	-	-	Bacteria; Proteobacteria; Gammaproteobacteria; Enterobacterales; Erwiniaceae; Erwinia
GCF_000091785.1_ASM9178v1	WP_003633119.1	P	K	+	+	-	-	-	Bacteria; Proteobacteria; Gammaproteobacteria; Legionellales; Legionellaceae; Legionella
GCF_000092045.1_ASM9204v1	WP_011427226.1	P	K	+	-	-	-	-	Bacteria; Proteobacteria; Alphaproteobacteria; Rhizobiales; Rhizobiaceae; Rhizobium/Agrobacterium group; Rhizobium
GCF_000092125.1_ASM9212v1	WP_013158449.1	I	R	-	-	-	+	-	Bacteria; Terrabacteria group; Deinococcus-Thermus; Deinococci; Thermales; Thermaceae; Meiothermus
GCF_000092225.1_ASM9222v1	WP_013127212.1	P	K	-	-	-	-	-	Bacteria; Terrabacteria group; Actinobacteria; Actinobacteria; Corynebacteriales; Tsukamurellaceae; Tsukamurella
GCF_000092265.1_ASM9226v1	WP_003659052.1	P	K	+	+	-	-	-	Bacteria; Proteobacteria; Gammaproteobacteria; Pseudomonadales; Moraxellaceae
GCF_000092285.1_ASM9228v1	WP_013081030.1	P	K	+	-	-	+	-	Bacteria; Proteobacteria; Alphaproteobacteria; Caulobacterales; Caulobacteraceae; Caulobacter
GCF_000092365.1_ASM9236v1	WP_013170072.1	P	K	-	-	-	-	-	Bacteria; Terrabacteria group; Actinobacteria; Actinobacteria; Actinomycetales; Actinomycetaceae; Arcanobacterium
GCF_000092405.1_ASM9240v1	WP_013174596.1	P	K	-	-	-	-	-	Bacteria; Terrabacteria group; Firmicutes; Clostridia; Clostridiales; Syntrophomonadaceae; Syntrophothermus
GCF_000092425.1_ASM9242v1	WP_013177612.1	M	R	-	-	-	+	-	Bacteria; Terrabacteria group; Deinococcus-Thermus; Deinococci; Deinococcales; Trueperaceae; Truepera
GCF_000092505.1_ASM9250v1	WP_013103670.1	P	K	-	-	-	-	-	Bacteria; Terrabacteria group; Firmicutes; Bacilli; Lactobacillales; Leuconostocaceae
GCF_000092645.1_ASM9264v1	WP_013131641.1	P	K	-	-	-	-	-	Bacteria; Terrabacteria group; Actinobacteria; Actinobacteria; Actinobacteria incertae sedis; Thermobispora
GCF_000092785.1_ASM9278v1	WP_013181331.1	P	K	+	-	-	-	-	Bacteria; PVC group; Chlamydiae; Chlamydiia; Parachlamydiales; Waddliaceae; Waddlia
GCF_000092825.1_ASM9282v1	WP_013139220.1	P	K	-	-	-	-	-	Bacteria; Terrabacteria group; Actinobacteria; Actinobacteria; Corynebacteriales; Segniliparaceae; Segniliparus
GCF_000092845.1_ASM9284v1	WP_013114470.1	A	Q	-	-	-	-	-	Bacteria; Spirochaetes; Spirochaetia; Brachyspirales; Brachyspiraceae
GCF_000092865.1_ASM9286v1	WP_013117069.1	P	K	-	-	-	-	-	Bacteria; Terrabacteria group; Actinobacteria; Actinobacteria; Micrococcales; Cellulomonadaceae; Cellulomonas
GCF_000092905.1_ASM9290v1	WP_013074770.1	P	K	-	-	-	-	-	Bacteria; Terrabacteria group; Firmicutes; Bacilli; Bacillales; Alicyclobacillaceae
GCF_000092925.1_ASM9292v1	WP_013166434.1	P	K	+	-	-	-	-	Bacteria; Proteobacteria; Alphaproteobacteria; Rhizobiales; Xanthobacteraceae; Starkeya
GCF_000092985.1_ASM9298v1	WP_041552350.1	P	K	-	-	-	-	-	Bacteria; Terrabacteria group; Actinobacteria; Actinobacteria; Streptosporangiales; Nocardiopsaceae
GCF_000093025.1_ASM9302v1	WP_013148257.1	S	R	-	-	+	-	-	Bacteria; Proteobacteria; Betaproteobacteria; Nitrosomonadales; Methylophilaceae; Methylotenera
GCF_000143085.1_ASM14308v1	WP_013219564.1	P	K	+	-	-	-	-	Bacteria; Proteobacteria; Gammaproteobacteria; Chromatiales; Chromatiaceae; Nitrosococcus
GCF_000143165.1_ASM14316v1	WP_013218326.1	P	K	+	-	-	-	-	Bacteria; Terrabacteria group; Chloroflexi; Dehalococcoidia; Dehalogenimonas
GCF_000143965.1_ASM14396v1	WP_013259011.1	P	K	-	-	-	-	-	Bacteria; Proteobacteria; delta/epsilon subdivisions; Deltaproteobacteria; Desulfarculales; Desulfarculaceae; Desulfarculus
GCF_000143985.1_ASM14398v1	WP_013256211.1	P	K	+	-	-	-	-	Bacteria; Spirochaetes; Spirochaetia; Spirochaetales; Spirochaetaceae; Sediminispirochaeta
GCF_000144605.1_ASM14460v1	WP_013268837.1	P	K	-	-	-	+	-	Bacteria; Proteobacteria; Alphaproteobacteria; Caulobacterales; Caulobacteraceae; Brevundimonas
GCF_000144625.1_ASM14462v1	WP_013272990.1	P	K	+	-	-	-	-	Bacteria; Terrabacteria group; Firmicutes; Clostridia; Clostridiales; Lachnospiraceae
GCF_000144645.1_ASM14464v1	WP_013276113.1	P	K	-	-	-	-	-	Bacteria; Terrabacteria group; Firmicutes; Clostridia; Thermoanaerobacterales; Thermoanaerobacterales Family III. Incertae Sedis; Thermosediminibacter
GCF_000144675.1_ASM14467v1	WP_013241995.1	P	K	-	-	-	-	-	Bacteria; Terrabacteria group; Actinobacteria; Actinobacteria; Corynebacteriales; Corynebacteriaceae; Corynebacterium
GCF_000144695.1_ASM14469v1	WP_013278703.1	P	K	-	-	-	-	-	Bacteria; Terrabacteria group; Firmicutes; Clostridia; Halanaerobiales; Halobacteroidaceae; Acetohalobium
GCF_000145235.1_ASM14523v1	WP_013285503.1	P	K	-	-	-	-	-	Bacteria; Terrabacteria group; Actinobacteria; Actinobacteria; Micromonosporales; Micromonosporaceae
GCF_000145255.1_ASM14525v1	WP_013292607.1	S	R	-	-	+	-	-	Bacteria; Proteobacteria; Betaproteobacteria; Nitrosomonadales; Gallionellaceae; Gallionella
GCF_000145615.1_ASM14561v1	WP_013297776.1	P	K	-	-	-	-	-	Bacteria; Terrabacteria group; Firmicutes; Clostridia; Thermoanaerobacterales; Thermoanaerobacterales Family III. Incertae Sedis; Thermoanaerobacterium
GCF_000146185.1_ASM14618v1	WP_012739555.1	P	K	-	-	-	-	-	Bacteria; Terrabacteria group; Firmicutes; Clostridia; Clostridiales; Eubacteriaceae
GCF_000147695.2_ASM14769v3	WP_004396379.1	P	K	-	-	-	-	-	Bacteria; Terrabacteria group; Firmicutes; Clostridia; Thermoanaerobacterales; Thermoanaerobacteraceae
GCF_000147715.2_ASM14771v3	WP_014730636.1	M	R	+	-	-	-	-	Bacteria; Thermotogae; Thermotogae; Kosmotogales; Kosmotogaceae; Mesotoga
GCF_000152825.2_ASM15282v2	WP_013300574.1	P	K	-	-	-	-	-	Bacteria; Proteobacteria; Alphaproteobacteria; Parvularculales; Parvularculaceae; Parvularcula
GCF_000153485.2_ASM15348v2	WP_015025981.1	P	K	-	-	-	+	-	Bacteria; FCB group; Bacteroidetes/Chlorobi group; Bacteroidetes; Flavobacteriia; Flavobacteriales; Flavobacteriaceae; Psychroflexus
GCF_000157355.2_ASM15735v2	WP_005229668.1	P	K	-	-	-	-	-	Bacteria; Terrabacteria group; Firmicutes; Bacilli; Lactobacillales; Enterococcaceae
GCF_000157895.3_ASM15789v2	WP_023373064.1	P	K	-	-	-	-	-	Bacteria; Terrabacteria group; Actinobacteria; Actinobacteria; Corynebacteriales; Mycobacteriaceae
GCF_000158275.2_ASM15827v2	WP_005908016.1	S	R	-	-	+	-	-	Bacteria; Fusobacteria; Fusobacteriia; Fusobacteriales; Fusobacteriaceae
GCF_000164675.2_ASM16467v2	WP_003005479.1	P	K	-	-	-	-	-	Bacteria; Terrabacteria group; Firmicutes; Bacilli; Lactobacillales; Streptococcaceae
GCF_000164695.2_ASM16469v2	WP_004004729.1	P	K	-	-	-	-	-	Bacteria; Terrabacteria group; Actinobacteria; Actinobacteria; Micrococcales; Micrococcaceae
GCF_000164865.1_ASM16486v1	WP_006816771.1	P	K	+	+	-	-	-	Bacteria; Proteobacteria; Gammaproteobacteria; Enterobacterales
GCF_000164985.3_ASM16498v2	WP_013371789.1	P	K	-	-	-	-	-	Bacteria; Terrabacteria group; Firmicutes; Bacilli; Bacillales; Paenibacillaceae
GCF_000165465.1_ASM16546v1	WP_014553070.1	S	R	-	-	-	-	-	Bacteria; Terrabacteria group; Firmicutes; Clostridia; Halanaerobiales; Halanaerobiaceae; Halanaerobium
GCF_000165485.1_ASM16548v1	WP_002614973.1	P	K	+	-	-	+	-	Bacteria; Proteobacteria; delta/epsilon subdivisions; Deltaproteobacteria; Myxococcales; Cystobacterineae; Archangiaceae; Stigmatella
GCF_000165505.1_ASM16550v1	WP_013389022.1	S	R	-	-	+	-	-	Bacteria; Fusobacteria; Fusobacteriia; Fusobacteriales; Fusobacteriaceae; Ilyobacter
GCF_000166055.1_ASM16605v1	WP_013420923.1	P	K	-	-	-	-	-	Bacteria; Proteobacteria; Alphaproteobacteria; Rhizobiales; Hyphomicrobiaceae
GCF_000166135.1_ASM16613v1	WP_013422850.1	P	K	-	-	-	-	-	Bacteria; Terrabacteria group; Actinobacteria; Actinobacteria; Frankiales; Frankiaceae; Frankia
GCF_000166395.1_ASM16639v1	WP_013408444.1	P	K	-	-	-	-	-	Bacteria; FCB group; Bacteroidetes/Chlorobi group; Bacteroidetes; Cytophagia; Cytophagales; Cytophagaceae; Leadbetterella
GCF_000166415.1_ASM16641v1	WP_013405910.1	S	R	-	-	-	-	-	Bacteria; Terrabacteria group; Firmicutes; Clostridia; Halanaerobiales; Halanaerobiaceae; Halanaerobium
GCF_000172635.2_ASM17263v2	WP_014948217.1	P	K	+	+	-	-	-	Bacteria; Proteobacteria; Gammaproteobacteria; Alteromonadales; Alteromonadaceae
GCF_000175575.2_ASM17557v2	WP_004872648.1	P	K	-	-	-	-	-	Bacteria; Proteobacteria; Acidithiobacillia; Acidithiobacillales; Acidithiobacillaceae; Acidithiobacillus
GCF_000177615.2_ASM17761v2	WP_013874519.1	P	K	-	-	-	-	-	Bacteria; Terrabacteria group; Actinobacteria; Actinobacteria; Frankiales; Frankiaceae
GCF_000177635.2_ASM17763v2	WP_013506191.1	P	K	-	-	-	-	-	Bacteria; Chrysiogenetes; Chrysiogenetes; Chrysiogenales; Chrysiogenaceae; Desulfurispirillum
GCF_000178115.2_ASM17811v2	WP_013484185.1	P	K	-	-	-	-	-	Bacteria; Terrabacteria group; Firmicutes; Clostridia; Clostridiales; Ruminococcaceae; Ethanoligenens
GCF_000178875.2_ASM17887v2	WP_006081573.1	S	R	-	-	+	-	-	Bacteria; Proteobacteria; Gammaproteobacteria; Alteromonadales; Shewanellaceae
GCF_000178955.2_ASM17895v2	WP_014264044.1	P	N	-	-	-	+	-	Bacteria; Acidobacteria; Acidobacteriia; Acidobacteriales; Acidobacteriaceae; Granulicella
GCF_000178975.2_ASM17897v2	WP_013581376.1	P	N	-	-	-	+	-	Bacteria; Acidobacteria; Acidobacteriia; Acidobacteriales; Acidobacteriaceae; Granulicella
GCF_000179035.2_ASM17903v2	WP_013609371.1	T	M	-	-	-	-	-	Bacteria; Terrabacteria group; Tenericutes; Mollicutes; Mycoplasmatales; Mycoplasmataceae; Mycoplasma
GCF_000179635.2_ASM17963v2	WP_013497177.1	P	K	-	-	-	-	-	Bacteria; Terrabacteria group; Firmicutes; Clostridia; Clostridiales; Ruminococcaceae; Ruminococcus
GCF_000179915.2_ASM17991v2	WP_013567808.1	P	N	-	-	-	+	-	Bacteria; Acidobacteria; Acidobacteriia; Acidobacteriales; Acidobacteriaceae; Terriglobus
GCF_000183135.1_ASM18313v1	WP_041620363.1	P	K	-	-	-	-	-	Bacteria; FCB group; Bacteroidetes/Chlorobi group; Bacteroidetes; Bacteroidia; Bacteroidales; Paludibacteraceae; Paludibacter
GCF_000183385.1_ASM18338v1	WP_013456043.1	Q	R	-	-	-	-	-	Bacteria; Terrabacteria group; Tenericutes; Mollicutes; Mycoplasmatales; Mycoplasmataceae; Mycoplasma
GCF_000183425.1_ASM18342v1	WP_013455316.1	P	K	-	-	-	+	-	Bacteria; FCB group; Bacteroidetes/Chlorobi group; Bacteroidetes; Cytophagia; Cytophagales; Flammeovirgaceae; Marivirga
GCF_000183725.1_ASM18372v1	WP_013459770.1	P	K	-	-	-	-	-	Bacteria; Proteobacteria; delta/epsilon subdivisions; Epsilonproteobacteria; Campylobacterales; Helicobacteraceae; Sulfuricurvum
GCF_000183745.1_ASM18374v1	WP_013458283.1	I	R	-	-	-	-	-	Bacteria; Terrabacteria group; Deinococcus-Thermus; Deinococci; Thermales; Thermaceae; Oceanithermus
GCF_000184345.1_ASM18434v2	WP_014624535.1	P	K	+	-	-	-	-	Bacteria; Spirochaetes; Spirochaetia; Spirochaetales; Spirochaetaceae; Spirochaeta
GCF_000184705.1_ASM18470v1	WP_013495604.1	P	R	-	-	-	-	-	Bacteria; Terrabacteria group; Firmicutes; Clostridia; Clostridiales; Clostridiales incertae sedis; Clostridiales Family XVII. Incertae Sedis; Thermaerobacter
GCF_000185805.1_ASM18580v1	WP_013536979.1	P	K	+	-	-	-	-	Bacteria; Aquificae; Aquificae; Desulfurobacteriales; Desulfurobacteriaceae; Thermovibrio
GCF_000186265.1_ASM18626v1	WP_013552855.1	P	K	-	-	-	+	-	Bacteria; FCB group; Bacteroidetes/Chlorobi group; Bacteroidetes; Flavobacteriia; Flavobacteriales; Flavobacteriaceae; Cellulophaga
GCF_000186345.1_ASM18634v1	WP_013563143.1	P	N	-	-	-	+	-	Bacteria; PVC group; Planctomycetes; Planctomycetia; Planctomycetales; Isosphaeraceae; Isosphaera
GCF_000187005.1_ASM18700v1	WP_015716879.1	I	R	-	-	-	+	-	Bacteria; Terrabacteria group; Deinococcus-Thermus; Deinococci; Thermales; Thermaceae
GCF_000189535.1_ASM18953v1	WP_013601091.1	P	K	-	-	-	-	-	Bacteria; Terrabacteria group; Actinobacteria; Actinobacteria; Micrococcales; Micrococcaceae; Pseudarthrobacter
GCF_000189775.2_ASM18977v3	WP_013787948.1	P	K	-	-	-	-	-	Bacteria; Terrabacteria group; Firmicutes; Clostridia; Thermoanaerobacterales; Thermoanaerobacterales Family III. Incertae Sedis
GCF_000190535.1_ASM19053v1	WP_013613136.1	P	K	-	-	-	-	-	Bacteria; FCB group; Bacteroidetes/Chlorobi group; Bacteroidetes; Bacteroidia; Bacteroidales; Odoribacteraceae; Odoribacter
GCF_000190575.1_ASM19057v1	WP_013617450.1	P	K	-	-	-	-	-	Bacteria; FCB group; Bacteroidetes/Chlorobi group; Bacteroidetes; Bacteroidia; Bacteroidales; Bacteroidaceae; Bacteroides
GCF_000190595.1_ASM19059v1	WP_013622526.1	P	K	-	-	-	+	-	Bacteria; FCB group; Bacteroidetes/Chlorobi group; Bacteroidetes; Flavobacteriia; Flavobacteriales; Flavobacteriaceae
GCF_000190635.1_ASM19063v1	WP_013625082.1	P	K	-	-	-	-	-	Bacteria; Terrabacteria group; Firmicutes; Clostridia; Clostridiales; Peptococcaceae; Syntrophobotulus
GCF_000191045.1_ASM19104v1	WP_013637676.1	P	K	+	-	-	-	-	Bacteria; Aquificae; Aquificae; Desulfurobacteriales; Desulfurobacteriaceae; Desulfurobacterium
GCF_000191545.1_ASM19154v1	WP_013438204.1	P	K	-	-	-	-	-	Bacteria; Terrabacteria group; Firmicutes; Bacilli; Lactobacillales; Lactobacillaceae
GCF_000191545.1_ASM19154v1	WP_013438554.1	P	K	-	-	-	-	-	Bacteria; Terrabacteria group; Firmicutes; Bacilli; Lactobacillales; Lactobacillaceae
GCF_000192745.1_ASM19274v1	WP_013651648.1	P	K	-	-	-	-	-	Bacteria; Proteobacteria; Alphaproteobacteria; unclassified Alphaproteobacteria; Polymorphum
GCF_000192865.1_ASM19286v1	WP_013660072.1	P	K	+	+	-	-	-	Bacteria; Proteobacteria; Gammaproteobacteria; Oceanospirillales; Oceanospirillaceae; Marinomonas
GCF_000193395.1_ASM19339v1	WP_004354453.1	P	K	-	-	-	-	-	Bacteria; FCB group; Bacteroidetes/Chlorobi group; Bacteroidetes; Bacteroidia; Bacteroidales; Prevotellaceae; Prevotella
GCF_000194135.1_ASM19413v1	WP_041324200.1	P	K	+	-	-	-	-	Bacteria; Proteobacteria; delta/epsilon subdivisions; Deltaproteobacteria; Desulfurellales; Desulfurellaceae; Hippea
GCF_000194605.1_ASM19460v1	WP_013688375.1	P	K	-	-	-	-	-	Bacteria; FCB group; Bacteroidetes/Chlorobi group; Bacteroidetes; Flavobacteriia; Flavobacteriales; Crocinitomicaceae; Fluviicola
GCF_000195275.1_ASM19527v1	WP_013702201.1	A	R	-	-	+	-	-	Bacteria; Spirochaetes; Spirochaetia; Spirochaetales; Spirochaetaceae; Treponema
GCF_000195295.1_ASM19529v1	WP_013706334.1	P	K	-	-	-	+	-	Bacteria; Proteobacteria; delta/epsilon subdivisions; Deltaproteobacteria; Syntrophobacterales; Syntrophaceae; Desulfobacca
GCF_000195315.1_ASM19531v1	WP_013708846.1	P	K	-	-	-	-	-	Bacteria; Terrabacteria group; Actinobacteria; Coriobacteriia; Coriobacteriales; Coriobacteriaceae; Coriobacterium
GCF_000195335.1_ASM19533v1	WP_013703616.1	I	R	-	-	-	-	-	Bacteria; Terrabacteria group; Deinococcus-Thermus; Deinococci; Thermales; Thermaceae; Marinithermus
GCF_000195775.1_ASM19577v1	WP_011158063.1	P	K	+	-	-	-	-	Bacteria; Proteobacteria; Alphaproteobacteria; Rhizobiales; Bradyrhizobiaceae; Rhodopseudomonas
GCF_000195875.1_ASM19587v1	WP_010925314.1	Q	R	-	-	-	-	-	Bacteria; Terrabacteria group; Tenericutes; Mollicutes; Mycoplasmatales; Mycoplasmataceae; Mycoplasma
GCF_000196015.1_ASM19601v1	WP_008642375.1	S	R	-	-	+	-	-	Bacteria; Proteobacteria; Betaproteobacteria; Burkholderiales; Burkholderiaceae
GCF_000196135.1_ASM19613v1	WP_011139144.1	P	K	-	-	-	-	-	Bacteria; Proteobacteria; delta/epsilon subdivisions; Epsilonproteobacteria; Campylobacterales; Helicobacteraceae; Wolinella
GCF_000196175.1_ASM19617v1	WP_011164897.1	P	K	+	-	-	+	-	Bacteria; Proteobacteria; Oligoflexia; Bdellovibrionales; Bdellovibrionaceae; Bdellovibrio
GCF_000196255.1_ASM19625v1	WP_011219913.1	P	K	+	-	-	-	-	Bacteria; Proteobacteria; Gammaproteobacteria; Vibrionales; Vibrionaceae
GCF_000196295.1_ASM19629v1	WP_002219406.1	G	R	-	-	+	-	-	Bacteria
GCF_000196395.1_ASM19639v1	WP_005317282.1	S	R	-	-	+	-	-	Bacteria; Proteobacteria; Gammaproteobacteria; Aeromonadales; Aeromonadaceae; Aeromonas
GCF_000196435.1_ASM19643v1	WP_012232455.1	P	K	-	-	-	-	-	Bacteria; Proteobacteria; Alphaproteobacteria; Rhizobiales; Bartonellaceae
GCF_000196455.1_ASM19645v1	WP_013361800.1	P	K	-	-	-	-	-	Bacteria; Terrabacteria group; Firmicutes; Clostridia; Clostridiales; Peptostreptococcaceae
GCF_000196495.1_ASM19649v1	WP_012551228.1	P	K	+	+	-	-	-	Bacteria; Proteobacteria; Gammaproteobacteria; Vibrionales; Vibrionaceae
GCF_000196515.1_ASM19651v1	WP_013190251.1	P	K	-	-	-	+	-	Bacteria; Terrabacteria group; Cyanobacteria/Melainabacteria group; Cyanobacteria; Nostocales; Nostocaceae; Trichormus
GCF_000196535.1_ASM19653v1	WP_004006784.1	P	K	-	-	-	-	-	Bacteria; Terrabacteria group; Actinobacteria; Actinobacteria; Actinomycetales; Actinomycetaceae; Mobiluncus
GCF_000196675.1_ASM19667v1	WP_013675625.1	P	K	-	-	-	-	-	Bacteria; Terrabacteria group; Actinobacteria; Actinobacteria; Pseudonocardiales; Pseudonocardiaceae; Pseudonocardia
GCF_000196695.1_ASM19669v1	WP_005513453.1	P	K	-	-	-	-	-	Bacteria; Terrabacteria group; Actinobacteria; Actinobacteria; Corynebacteriales; Nocardiaceae
GCF_000196735.1_ASM19673v1	WP_013352846.1	P	K	-	-	-	-	-	Bacteria; Terrabacteria group; Firmicutes; Bacilli; Bacillales; Bacillaceae; Bacillus
GCF_000196815.1_ASM19681v1	WP_013248998.1	P	K	-	-	-	+	-	Bacteria; Nitrospirae; Nitrospira; Nitrospirales; Nitrospiraceae
GCF_000198775.1_ASM19877v1	WP_041753181.1	S	R	-	-	+	-	-	Bacteria; Proteobacteria; Betaproteobacteria; Burkholderiales; Burkholderiaceae; Paraburkholderia
GCF_000200595.1_ASM20059v1	WP_013469606.1	P	K	-	-	-	-	-	Bacteria; Proteobacteria; delta/epsilon subdivisions; Epsilonproteobacteria; Campylobacterales; Helicobacteraceae; Helicobacter
GCF_000202835.1_ASM20283v1	WP_007423006.1	P	K	+	-	-	-	-	Bacteria; Proteobacteria; Alphaproteobacteria; Rhodospirillales; Acetobacteraceae
GCF_000203895.1_ASM20389v1	WP_041529873.1	P	K	+	-	-	-	-	Bacteria; Proteobacteria; Alphaproteobacteria; Rhodobacterales; Rhodobacteraceae; Paracoccus
GCF_000204135.1_ASM20413v1	WP_013712958.1	G	K	-	-	-	-	-	Bacteria; PVC group; Chlamydiae; Chlamydiia; Chlamydiales; Chlamydiaceae; Chlamydia/Chlamydophila group; Chlamydia
GCF_000204155.1_ASM20415v1	WP_013732772.1	P	K	+	-	-	-	-	Bacteria; Terrabacteria group; Actinobacteria; Actinobacteria; Micromonosporales; Micromonosporaceae; Verrucosispora
GCF_000204255.1_ASM20425v1	WP_006343227.1	G	K	-	-	-	-	-	Bacteria; PVC group; Chlamydiae; Chlamydiia; Chlamydiales; Chlamydiaceae; Chlamydia/Chlamydophila group; Chlamydia
GCF_000204255.1_ASM20425v1	WP_006343530.1	P	K	-	-	-	-	-	Bacteria; PVC group; Chlamydiae; Chlamydiia; Chlamydiales; Chlamydiaceae; Chlamydia/Chlamydophila group; Chlamydia
GCF_000208385.1_ASM20838v1	WP_013739938.1	P	K	+	-	-	-	-	Bacteria; Spirochaetes; Spirochaetia; Spirochaetales; Spirochaetaceae; Sphaerochaeta
GCF_000209675.1_ASM20967v1	WP_013746294.1	P	K	+	+	-	-	-	Bacteria; Proteobacteria; Gammaproteobacteria; Pasteurellales; Pasteurellaceae; Gallibacterium
GCF_000210915.2_ASM21091v2	WP_014242861.1	P	K	+	+	-	-	-	Bacteria; Proteobacteria; Oligoflexia; Bacteriovoracales; Halobacteriovoraceae; Halobacteriovorax
GCF_000212375.1_ASM21237v1	WP_004330866.1	P	K	-	-	-	-	-	Bacteria; FCB group; Bacteroidetes/Chlorobi group; Bacteroidetes; Bacteroidia; Bacteroidales; Porphyromonadaceae; Porphyromonas
GCF_000212415.1_ASM21241v1	WP_013757923.1	P	K	+	-	-	-	-	Bacteria; Spirochaetes; Spirochaetia; Spirochaetales; Spirochaetaceae; Treponema
GCF_000212695.1_ASM21269v1	WP_013771143.1	P	K	-	-	-	-	-	Bacteria; Terrabacteria group; Actinobacteria; Actinobacteria; Micrococcales; Cellulomonadaceae; Cellulomonas
GCF_000213805.1_ASM21380v1	WP_013791768.1	S	R	-	-	+	-	-	Bacteria; Proteobacteria; Gammaproteobacteria; Pseudomonadales; Pseudomonadaceae
GCF_000213825.1_ASM21382v1	WP_003104307.1	P	K	-	-	-	-	-	Bacteria; Terrabacteria group; Firmicutes; Bacilli; Lactobacillales; Streptococcaceae; Streptococcus
GCF_000214095.2_ASM21409v3	WP_014028769.1	P	K	-	-	-	-	-	Bacteria; Proteobacteria; Acidithiobacillia; Acidithiobacillales; Acidithiobacillaceae; Acidithiobacillus
GCF_000214175.1_ASM21417v1	WP_013806649.1	P	K	-	-	-	-	-	Bacteria; Terrabacteria group; Actinobacteria; Actinobacteria; Corynebacteriales; Mycobacteriaceae; Hoyosella
GCF_000214215.1_ASM21421v1	WP_013797422.1	P	K	+	+	-	-	-	Bacteria; Proteobacteria; Gammaproteobacteria; Oceanospirillales; Oceanospirillaceae; Marinomonas
GCF_000214355.1_ASM21435v1	WP_015711861.1	P	K	+	-	-	-	-	Bacteria; Spirochaetes; Spirochaetia; Spirochaetales; Spirochaetaceae; Treponema
GCF_000214435.1_ASM21443v1	WP_003543111.1	P	K	-	-	-	-	-	Bacteria; Terrabacteria group; Firmicutes; Clostridia; Clostridiales; Peptococcaceae; Desulfotomaculum
GCF_000214785.1_ASM21478v1	WP_013853871.1	P	K	-	-	-	-	-	Bacteria; Terrabacteria group; Firmicutes; Bacilli; Lactobacillales; Lactobacillaceae; Lactobacillus
GCF_000214785.1_ASM21478v1	WP_013854711.1	P	K	-	-	-	-	-	Bacteria; Terrabacteria group; Firmicutes; Bacilli; Lactobacillales; Lactobacillaceae; Lactobacillus
GCF_000214825.1_ASM21482v1	WP_013835393.1	S	R	-	-	+	-	-	Bacteria; Proteobacteria; Gammaproteobacteria; Thiotrichales; Piscirickettsiaceae; Thiomicrospira
GCF_000215085.1_ASM21508v1	WP_013843058.1	P	K	-	-	-	-	-	Bacteria; Terrabacteria group; Firmicutes; Clostridia; Clostridiales; Peptococcaceae; Desulfotomaculum
GCF_000215705.1_ASM21570v1	WP_041675501.1	G	R	-	-	+	-	-	Bacteria; Proteobacteria; Betaproteobacteria; Burkholderiales; Comamonadaceae; Ramlibacter
GCF_000217635.1_ASM21763v1	WP_013877748.1	P	K	-	-	-	-	-	Bacteria; Proteobacteria; Gammaproteobacteria; Enterobacterales; Erwiniaceae; Buchnera
GCF_000217675.1_ASM21767v1	WP_017043203.1	P	K	+	+	-	-	-	Bacteria; Proteobacteria; Gammaproteobacteria; Vibrionales; Vibrionaceae
GCF_000217795.1_ASM21779v1	WP_013907436.1	V	K	-	-	-	-	-	Bacteria; Thermodesulfobacteria; Thermodesulfobacteria; Thermodesulfobacteriales; Thermodesulfobacteriaceae; Thermodesulfatator
GCF_000218545.1_ASM21854v1	WP_013883817.1	P	K	-	-	-	-	-	Bacteria; Terrabacteria group; Actinobacteria; Actinobacteria; Micrococcales; Cellulomonadaceae; Cellulomonas
GCF_000218565.1_ASM21856v1	WP_012563171.1	P	K	+	-	-	-	-	Bacteria; Proteobacteria; Alphaproteobacteria; Rhizobiales; Bradyrhizobiaceae; Oligotropha
GCF_000219105.1_ASM21910v1	WP_013942210.1	P	K	+	-	-	+	-	Bacteria; Proteobacteria; delta/epsilon subdivisions; Deltaproteobacteria; Myxococcales; Cystobacterineae; Myxococcaceae; Myxococcus
GCF_000219215.1_ASM21921v1	WP_013957355.1	S	R	-	-	+	-	-	Bacteria; Proteobacteria; Betaproteobacteria; Burkholderiales; Burkholderiaceae
GCF_000219535.2_ASM21953v3	WP_003337912.1	P	K	-	-	-	-	-	Bacteria; Terrabacteria group; Firmicutes; Bacilli; Bacillales; Paenibacillaceae; Brevibacillus
GCF_000219605.1_ASM21960v1	WP_011913626.1	S	R	-	-	+	-	-	Bacteria; Proteobacteria; Gammaproteobacteria; Pseudomonadales; Pseudomonadaceae
GCF_000219725.1_ASM21972v1	WP_013968427.1	P	K	+	-	-	-	-	Bacteria; Spirochaetes; Spirochaetia; Spirochaetales; Spirochaetaceae; Treponema
GCF_000219805.1_ASM21980v1	WP_006845054.1	P	K	-	-	-	-	-	Bacteria; Terrabacteria group; Firmicutes; Bacilli; Lactobacillales; Leuconostocaceae; Weissella
GCF_000222305.1_ASM22230v1	WP_014023465.1	T	R	-	-	-	-	-	Bacteria; Spirochaetes; Spirochaetia; Spirochaetales; Borreliaceae; Borreliella
GCF_000222485.1_ASM22248v1	WP_014019059.1	P	K	-	-	-	+	-	Bacteria; FCB group; Bacteroidetes/Chlorobi group; Bacteroidetes; Cytophagia; Cytophagales; Cyclobacteriaceae; Cyclobacterium
GCF_000224005.2_ASM22400v3	WP_025275289.1	P	K	+	-	-	-	-	Bacteria; Proteobacteria; Gammaproteobacteria; Chromatiales; Chromatiaceae
GCF_000224085.1_ASM22408v1	WP_014034406.1	P	K	-	-	-	+	-	Bacteria; FCB group; Bacteroidetes/Chlorobi group; Bacteroidetes; Flavobacteriia; Flavobacteriales; Flavobacteriaceae; Muricauda
GCF_000224105.1_ASM22410v1	WP_014035048.1	T	R	-	-	-	-	-	Bacteria; Terrabacteria group; Tenericutes; Mollicutes; Mycoplasmatales; Mycoplasmataceae; Mycoplasma
GCF_000224985.1_ASM22498v1	WP_014073324.1	P	K	-	-	-	-	-	Bacteria; Terrabacteria group; Firmicutes; Bacilli; Lactobacillales; Lactobacillaceae; Lactobacillus
GCF_000225345.1_ASM22534v1	WP_014079187.1	P	K	-	-	-	-	-	Bacteria; Terrabacteria group; Firmicutes; Clostridia; Clostridiales; Lachnospiraceae; Roseburia
GCF_000225445.1_ASM22544v1	WP_014499193.1	P	K	+	-	-	-	-	Bacteria; Proteobacteria; Gammaproteobacteria; Enterobacterales; Erwiniaceae; Buchnera
GCF_000225465.1_ASM22546v1	WP_014499759.1	P	K	+	-	-	-	-	Bacteria; Proteobacteria; Gammaproteobacteria; Enterobacterales; Erwiniaceae; Buchnera
GCF_000226295.1_ASM22629v1	WP_014099644.1	P	N	-	-	-	+	-	Bacteria; Acidobacteria; Blastocatellia; Chloracidobacterium
GCF_000226295.1_ASM22629v1	WP_081464954.1	P	A	-	-	-	+	-	Bacteria; Acidobacteria; Blastocatellia; Chloracidobacterium
GCF_000226315.1_ASM22631v1	WP_014101757.1	S	R	-	-	+	-	-	Bacteria; Proteobacteria; Alphaproteobacteria; unclassified Alphaproteobacteria; Micavibrio
GCF_000226565.1_ASM22656v1	WP_014109845.1	P	K	+	+	-	-	-	Bacteria; Proteobacteria; Gammaproteobacteria; Alteromonadales; Alteromonadaceae; Glaciecola
GCF_000227665.2_ASM22766v3	WP_006459010.1	S	R	-	-	+	-	-	Bacteria; Proteobacteria; Gammaproteobacteria; Thiotrichales; Piscirickettsiaceae; Thiomicrospira
GCF_000227705.2_ASM22770v3	WP_015254859.1	P	K	-	-	-	-	-	Bacteria; Terrabacteria group; Firmicutes; Bacilli; Bacillales; Paenibacillaceae; Thermobacillus
GCF_000227745.2_ASM22774v3	WP_014776800.1	P	K	+	-	-	-	-	Bacteria; Proteobacteria; Gammaproteobacteria; Chromatiales; Chromatiaceae; Thiocystis
GCF_000230555.1_ASM23055v1	WP_014131635.1	P	K	-	-	-	-	-	Bacteria; Proteobacteria; Alphaproteobacteria; Rhizobiales; Hyphomicrobiaceae
GCF_000230695.2_ASM23069v3	WP_007510530.1	P	K	+	-	-	-	-	Bacteria; Proteobacteria; Gammaproteobacteria; Xanthomonadales; Rhodanobacteraceae
GCF_000230895.2_ASM23089v3	WP_014213601.1	P	K	-	-	-	-	-	Bacteria; Terrabacteria group; Actinobacteria; Actinobacteria; Corynebacteriales; Mycobacteriaceae; Mycolicibacterium
GCF_000231385.2_ASM23138v3	WP_014901953.1	P	K	-	-	-	-	-	Bacteria; Terrabacteria group; Firmicutes; Clostridia; Clostridiales; Peptococcaceae
GCF_000233715.2_ASM23371v3	WP_006521760.1	P	K	-	-	-	-	-	Bacteria; Terrabacteria group; Firmicutes; Clostridia; Clostridiales; Peptococcaceae; Desulfallas
GCF_000233775.1_ASM23377v1	WP_014163015.1	M	R	-	-	-	-	-	Bacteria; Synergistetes; Synergistia; Synergistales; Synergistaceae; Thermovirga
GCF_000233915.3_ASM23391v4	WP_014160468.1	P	K	-	-	-	-	-	Bacteria; Proteobacteria; Gammaproteobacteria; Xanthomonadales; Xanthomonadaceae; Pseudoxanthomonas
GCF_000235605.1_ASM23560v1	WP_014183516.1	P	K	-	-	-	-	-	Bacteria; Terrabacteria group; Firmicutes; Clostridia; Clostridiales; Peptococcaceae; Desulfosporosinus
GCF_000236665.1_ASM23666v1	WP_014237519.1	S	R	-	-	+	-	-	Bacteria; Proteobacteria; Betaproteobacteria; Rhodocyclales; Rhodocyclaceae; Azospira
GCF_000236705.1_ASM23670v1	WP_014202176.1	P	K	-	-	-	+	-	Bacteria; FCB group; Bacteroidetes/Chlorobi group; Bacteroidetes; Flavobacteriia; Flavobacteriales; Cryomorphaceae; Owenweeksia
GCF_000237085.1_ASM23708v1	WP_014254628.1	P	K	-	-	-	-	-	Bacteria; Terrabacteria group; Firmicutes; Clostridia; Clostridiales; Hungateiclostridiaceae; Hungateiclostridium
GCF_000237205.1_ASM23720v1	WP_013942749.1	P	K	+	-	-	+	-	Bacteria; PVC group; Chlamydiae; Chlamydiia; Parachlamydiales; Simkaniaceae; Simkania
GCF_000238215.1_ASM23821v1	WP_014224790.1	P	K	-	-	-	-	-	Bacteria; FCB group; Bacteroidetes/Chlorobi group; Bacteroidetes; Bacteroidia; Bacteroidales; Tannerellaceae; Tannerella
GCF_000238255.3_ASM23825v4	WP_010562106.1	P	K	+	+	-	-	-	Bacteria; Proteobacteria; Gammaproteobacteria; Alteromonadales; Pseudoalteromonadaceae
GCF_000240075.2_ASM24007v2	WP_014164189.1	P	K	-	-	-	+	-	Bacteria; FCB group; Bacteroidetes/Chlorobi group; Bacteroidetes; Flavobacteriia; Flavobacteriales; Flavobacteriaceae; Flavobacterium
GCF_000240165.1_ASM24016v1	WP_014146035.1	P	K	-	-	-	-	-	Bacteria; Terrabacteria group; Actinobacteria; Actinobacteria; Streptomycetales; Streptomycetaceae; Streptomyces
GCF_000242255.2_ASM24225v3	WP_014403163.1	P	K	+	-	-	-	-	Bacteria; Proteobacteria; Gammaproteobacteria; Xanthomonadales; Rhodanobacteraceae; Frateuria
GCF_000242455.2_ASM24245v3	WP_015249384.1	P	N	-	-	-	+	-	Bacteria; PVC group; Planctomycetes; Planctomycetia; Planctomycetales; Isosphaeraceae; Singulisphaera
GCF_000243135.2_ASM24313v3	WP_015262838.1	P	K	-	-	-	-	-	Bacteria; Terrabacteria group; Firmicutes; Clostridia; Clostridiales; Peptococcaceae; Desulfitobacterium
GCF_000243155.2_ASM24315v3	WP_014794736.1	P	K	-	-	-	-	-	Bacteria; Terrabacteria group; Firmicutes; Clostridia; Clostridiales; Peptococcaceae
GCF_000246855.1_ASM24685v1	WP_014216620.1	T	R	-	-	-	+	-	Bacteria; FCB group; Bacteroidetes/Chlorobi group; Bacteroidetes; Chitinophagia; Chitinophagales; Chitinophagaceae; Niastella
GCF_000247565.1_ASM24756v1	WP_014354252.1	P	K	+	-	-	-	-	Bacteria; Proteobacteria; Gammaproteobacteria; Enterobacterales; Erwiniaceae; Wigglesworthia
GCF_000248095.2_ASM24809v3	WP_006500841.1	P	K	-	-	-	-	-	Bacteria; Terrabacteria group; Firmicutes; Bacilli; Lactobacillales; Lactobacillaceae; Lactobacillus
GCF_000250635.1_ASM25063v1	WP_015692972.1	P	K	-	-	-	-	-	Bacteria; FCB group; Bacteroidetes/Chlorobi group; Bacteroidetes; Saprospiria; Saprospirales; Saprospiraceae; Saprospira
GCF_000250655.1_ASM25065v1	WP_014369984.1	P	K	-	-	-	-	-	Bacteria; Terrabacteria group; Firmicutes; Bacilli; Bacillales; Paenibacillaceae; Paenibacillus
GCF_000250675.2_ASM25067v3	WP_014986478.1	P	K	+	-	-	-	-	Bacteria; Terrabacteria group; Actinobacteria; Actinobacteria; Corynebacteriales; Nocardiaceae
GCF_000252855.1_ASM25285v1	WP_004918666.1	P	K	-	-	-	+	-	Bacteria; FCB group; Bacteroidetes/Chlorobi group; Bacteroidetes; Flavobacteriia; Flavobacteriales; Flavobacteriaceae; Riemerella
GCF_000253015.1_ASM25301v1	WP_013545519.1	P	K	-	-	-	-	-	Bacteria; Proteobacteria; Alphaproteobacteria; Rhizobiales; Bartonellaceae; Bartonella
GCF_000253035.1_ASM25303v1	WP_006342100.1	P	K	+	-	-	+	-	Bacteria; PVC group; Chlamydiae; Chlamydiia; Parachlamydiales; Parachlamydiaceae; Parachlamydia
GCF_000253395.1_ASM25339v1	WP_011227545.1	P	K	-	-	-	-	-	Bacteria; Terrabacteria group; Firmicutes; Bacilli; Lactobacillales; Streptococcaceae; Streptococcus
GCF_000255135.1_ASM25513v1	WP_014295764.1	T	R	+	-	-	-	-	Bacteria; Thermotogae; Thermotogae; Petrotogales; Petrotogaceae
GCF_000255295.1_ASM25529v1	WP_014399057.1	P	K	-	-	-	+	-	Bacteria; Proteobacteria; delta/epsilon subdivisions; Deltaproteobacteria; Myxococcales; Cystobacterineae; Myxococcaceae; Corallococcus
GCF_000255535.1_ASM25553v1	WP_013573742.1	P	K	+	+	-	-	-	Bacteria; Proteobacteria; Gammaproteobacteria; Enterobacterales; Yersiniaceae
GCF_000258405.1_ASM25840v1	WP_014559674.1	P	K	-	-	-	+	-	Bacteria; FCB group; Bacteroidetes/Chlorobi group; Ignavibacteriae; Ignavibacteria; Ignavibacteriales; Ignavibacteriaceae; Ignavibacterium
GCF_000259255.1_ASM25925v1	WP_014661333.1	P	K	-	-	-	-	-	Bacteria; Proteobacteria; delta/epsilon subdivisions; Epsilonproteobacteria; Campylobacterales; Helicobacteraceae; Helicobacter
GCF_000260965.1_ASM26096v1	WP_014703735.1	P	K	+	-	-	-	-	Bacteria; Proteobacteria; Gammaproteobacteria; Thiotrichales; Piscirickettsiaceae; Methylophaga
GCF_000260985.4_ASM26098v3	WP_041354687.1	P	K	+	-	-	-	-	Bacteria; Proteobacteria; Gammaproteobacteria; Thiotrichales; Piscirickettsiaceae; Methylophaga
GCF_000262305.1_ASM26230v1	WP_002441573.1	P	K	+	+	-	-	-	Bacteria; Proteobacteria; Gammaproteobacteria; Enterobacterales; Enterobacteriaceae; Shimwellia
GCF_000264765.2_ASM26476v2	WP_015869834.1	P	K	+	+	-	-	-	Bacteria; Proteobacteria; Gammaproteobacteria; Enterobacterales; Hafniaceae
GCF_000265295.1_ASM26529v1	WP_014768865.1	P	K	-	-	-	-	-	Bacteria; Proteobacteria; delta/epsilon subdivisions; Epsilonproteobacteria; Campylobacterales; Campylobacteraceae; Sulfurospirillum
GCF_000265385.1_ASM26538v1	WP_014783353.1	P	K	-	-	-	+	-	Bacteria; FCB group; Bacteroidetes/Chlorobi group; Bacteroidetes; Flavobacteriia; Flavobacteriales; Flavobacteriaceae; Aequorivita
GCF_000265405.1_ASM26540v1	WP_014772948.1	P	K	-	-	-	+	-	Bacteria; FCB group; Bacteroidetes/Chlorobi group; Bacteroidetes; Cytophagia; Cytophagales; Cyclobacteriaceae; Belliella
GCF_000265505.1_ASM26550v1	WP_014796374.1	P	K	-	-	-	-	-	Bacteria; FCB group; Bacteroidetes/Chlorobi group; Bacteroidetes; Cytophagia; Cytophagales; Bernardetiaceae; Bernardetia
GCF_000266885.1_ASM26688v1	WP_014804293.1	P	K	+	-	-	-	-	Bacteria; Spirochaetes; Spirochaetia; Leptospirales; Leptospiraceae; Turneriella
GCF_000266905.1_ASM26690v1	WP_014815643.1	P	K	-	-	-	-	-	Bacteria; Terrabacteria group; Actinobacteria; Actinobacteria; Corynebacteriales; Mycobacteriaceae; Mycolicibacterium
GCF_000266925.1_ASM26692v1	WP_014806646.1	M	R	-	-	-	-	-	Bacteria; Synergistetes; Synergistia; Synergistales; Synergistaceae
GCF_000266945.1_ASM26694v1	WP_014811474.1	P	K	-	-	-	-	-	Bacteria; Proteobacteria; delta/epsilon subdivisions; Deltaproteobacteria; Syntrophobacterales; Syntrophaceae; Desulfomonile
GCF_000269925.1_ASM26992v1	WP_003132984.1	P	K	-	-	-	-	-	Bacteria; Terrabacteria group; Firmicutes; Bacilli; Lactobacillales; Streptococcaceae
GCF_000269985.1_ASM26998v1	WP_014134545.1	P	K	-	-	-	-	-	Bacteria; Terrabacteria group; Actinobacteria; Actinobacteria; Streptomycetales; Streptomycetaceae; Kitasatospora
GCF_000270085.1_ASM27008v1	WP_003773819.1	T	Q	-	-	-	-	-	Bacteria; Terrabacteria group; Firmicutes; Erysipelotrichia; Erysipelotrichales; Erysipelotrichaceae; Erysipelothrix
GCF_000270245.1_ASM27024v1	WP_013863525.1	P	K	-	-	-	-	-	Bacteria; Terrabacteria group; Actinobacteria; Actinobacteria; Propionibacteriales; Propionibacteriaceae; Microlunatus
GCF_000271405.2_ASM27140v2	WP_010720208.1	P	K	-	-	-	-	-	Bacteria; Terrabacteria group; Firmicutes; Bacilli; Lactobacillales; Enterococcaceae; Enterococcus
GCF_000271665.2_ASM27166v2	WP_007952820.1	P	K	-	-	-	-	-	Bacteria; Terrabacteria group; Firmicutes; Negativicutes; Selenomonadales; Sporomusaceae
GCF_000277715.1_ASM27771v1	WP_014846648.1	P	K	-	-	-	-	-	Bacteria; Terrabacteria group; Actinobacteria; Actinobacteria; Propionibacteriales; Propionibacteriaceae; Pseudopropionibacterium
GCF_000277795.1_ASM27779v1	WP_014849943.1	T	M	+	-	-	-	-	Bacteria; Terrabacteria group; Tenericutes; Mollicutes; Mycoplasmatales; Mycoplasmataceae; Mycoplasma
GCF_000281175.1_ASM28117v1	WP_014432539.1	V	R	-	-	-	+	-	Bacteria; Terrabacteria group; Chloroflexi; Caldilineae; Caldilineales; Caldilineaceae; Caldilinea
GCF_000281175.1_ASM28117v1	WP_044276584.1	P	N	-	-	-	+	-	Bacteria; Terrabacteria group; Chloroflexi; Caldilineae; Caldilineales; Caldilineaceae; Caldilinea
GCF_000283575.1_ASM28357v1	WP_014117433.1	P	K	-	-	-	-	-	Bacteria; Terrabacteria group; Firmicutes; Clostridia; Clostridiales; Oscillospiraceae; Oscillibacter
GCF_000284015.1_ASM28401v1	WP_014376139.1	P	K	-	-	-	-	-	Bacteria; Terrabacteria group; Actinobacteria; Actinobacteria; Geodermatophilales; Geodermatophilaceae; Blastococcus
GCF_000284035.1_ASM28403v1	WP_014351746.1	P	K	-	-	-	-	-	Bacteria; Terrabacteria group; Actinobacteria; Actinobacteria; Corynebacteriales; Nocardiaceae; Nocardia
GCF_000284115.1_ASM28411v1	WP_083855151.1	P	K	-	-	-	+	-	Bacteria; PVC group; Planctomycetes; Phycisphaerae; Phycisphaerales; Phycisphaeraceae; Phycisphaera
GCF_000284155.1_ASM28415v1	WP_014413038.1	P	K	-	-	-	-	-	Bacteria; Proteobacteria; Alphaproteobacteria; Rickettsiales; Rickettsiaceae; Rickettsieae; Rickettsia; spotted fever group
GCF_000284295.1_ASM28429v1	WP_014446328.1	P	K	-	-	-	-	-	Bacteria; Terrabacteria group; Actinobacteria; Actinobacteria; Micromonosporales; Micromonosporaceae; Actinoplanes
GCF_000284315.1_ASM28431v1	WP_014449152.1	P	K	-	-	-	-	-	Bacteria; Nitrospirae; Nitrospira; Nitrospirales; Nitrospiraceae; Leptospirillum; Leptospirillum sp. Group I
GCF_000284335.1_ASM28433v1	WP_014453312.1	P	K	+	-	-	-	-	Bacteria; Caldiserica/Cryosericota group; Caldiserica; Caldisericia; Caldisericales; Caldisericaceae; Caldisericum
GCF_000284415.1_ASM28441v2	WP_041795193.1	P	K	+	-	-	-	-	Bacteria; Proteobacteria; Alphaproteobacteria; Rhodospirillales; Rhodospirillaceae; Pararhodospirillum
GCF_000284515.1_ASM28451v1	WP_014643723.1	P	K	-	-	-	-	-	Bacteria; Terrabacteria group; Firmicutes; Bacilli; Bacillales; Bacillaceae; Halobacillus
GCF_000284615.1_ASM28461v1	WP_011786227.1	P	K	+	+	-	-	-	Bacteria; Proteobacteria; Gammaproteobacteria; Alteromonadales; Alteromonadaceae
GCF_000286435.2_ASM28643v2	WP_004234989.1	P	K	+	+	-	-	-	Bacteria; Proteobacteria; Gammaproteobacteria; Enterobacterales; Morganellaceae
GCF_000287355.1_ASM28735v1	WP_014889062.1	P	K	+	-	-	-	-	Bacteria; Proteobacteria; Gammaproteobacteria; Enterobacterales; Enterobacteriaceae; unclassified Enterobacteriaceae; ant, tsetse, mealybug, aphid, etc. endosymbionts; aphid secondary symbionts
GCF_000294515.1_ASM29451v1	WP_014910495.1	P	K	+	-	-	-	-	Bacteria; Terrabacteria group; Actinobacteria; Actinobacteria; Streptosporangiales; Nocardiopsaceae; Nocardiopsis
GCF_000294775.2_ASM29477v2	WP_009332911.1	P	K	-	-	-	-	-	Bacteria; Terrabacteria group; Firmicutes; Bacilli; Bacillales; Bacillaceae
GCF_000298115.2_ASM29811v2	WP_013727961.1	P	K	-	-	-	-	-	Bacteria; Terrabacteria group; Firmicutes; Bacilli; Lactobacillales; Lactobacillaceae; Lactobacillus
GCF_000299235.1_ASM29923v1	WP_014961240.1	P	K	-	-	-	-	-	Bacteria; Nitrospirae; Nitrospira; Nitrospirales; Nitrospiraceae
GCF_000299335.2_ASM29933v2	WP_008733367.1	P	K	+	+	-	-	-	Bacteria; Proteobacteria; Gammaproteobacteria; Oceanospirillales; Alcanivoracaceae; Alcanivorax
GCF_000300005.1_ASM30000v1	WP_014993055.1	P	K	+	+	-	-	-	Bacteria; Proteobacteria; Gammaproteobacteria; Oceanospirillales; Alcanivoracaceae; Alcanivorax
GCF_000300135.1_ASM30013v1	WP_014973902.1	P	K	-	-	-	-	-	Bacteria; Terrabacteria group; Firmicutes; Bacilli; Lactobacillales; Leuconostocaceae; Leuconostoc
GCF_000300295.4_ASM30029v4	WP_017378362.1	P	K	+	-	-	-	-	Bacteria; Proteobacteria; Gammaproteobacteria; Thiotrichales; Piscirickettsiaceae; Piscirickettsia
GCF_000300455.3_ASM30045v4	WP_017459193.1	P	K	+	+	-	-	-	Bacteria; Proteobacteria; Gammaproteobacteria; Enterobacterales
GCF_000304215.1_ASM30421v1	WP_015022137.1	P	K	-	-	-	-	-	Bacteria; Terrabacteria group; Actinobacteria; Actinobacteria; Bifidobacteriales; Bifidobacteriaceae
GCF_000304455.1_CCh_cEper1	WP_014934571.1	P	K	-	-	-	-	-	Bacteria; FCB group; Bacteroidetes/Chlorobi group; Bacteroidetes; Cytophagia; Cytophagales; Amoebophilaceae; Candidatus Cardinium
GCF_000304735.1_ASM30473v1	WP_015055399.1	T	R	-	-	-	-	-	Bacteria; Spirochaetes; Spirochaetia; Spirochaetales; Borreliaceae; Borreliella
GCF_000306785.1_ASM30678v1	WP_014741326.1	P	K	-	-	-	-	-	Bacteria; Terrabacteria group; Actinobacteria; Actinobacteria; Geodermatophilales; Geodermatophilaceae; Modestobacter
GCF_000307105.1_ASM30710v1	WP_014956946.1	P	K	+	-	-	-	-	Bacteria; Proteobacteria; delta/epsilon subdivisions; Deltaproteobacteria; Desulfobacterales; Desulfobacteraceae
GCF_000309885.1_ASM30988v1	WP_016329698.1	I	R	-	-	-	+	-	Bacteria; Terrabacteria group; Deinococcus-Thermus; Deinococci; Thermales; Thermaceae; Thermus
GCF_000311765.1_ASM31176v1	WP_007282875.1	P	K	+	-	-	-	-	Bacteria; Proteobacteria; Alphaproteobacteria; Rhodospirillales; Acetobacteraceae
GCF_000313175.2_ASM31317v2	WP_004460032.1	P	K	+	-	-	-	-	Bacteria; Spirochaetes; Spirochaetia; Leptospirales; Leptospiraceae
GCF_000313635.1_ASM31363v1	WP_014335459.1	Q	R	-	-	-	-	-	Bacteria; Terrabacteria group; Tenericutes; Mollicutes; Mycoplasmatales; Mycoplasmataceae; Mycoplasma
GCF_000316515.1_ASM31651v1	WP_015109877.1	P	K	-	-	-	-	-	Bacteria; Terrabacteria group; Cyanobacteria/Melainabacteria group; Cyanobacteria; Synechococcales; Synechococcaceae; Cyanobium
GCF_000317025.1_ASM31702v1	WP_015145905.1	P	K	-	-	-	-	-	Bacteria; Terrabacteria group; Cyanobacteria/Melainabacteria group; Cyanobacteria
GCF_000317105.1_ASM31710v1	WP_015146997.1	P	K	-	-	-	+	-	Bacteria; Terrabacteria group; Cyanobacteria/Melainabacteria group; Cyanobacteria; Oscillatoriophycideae; Oscillatoriales; Oscillatoriaceae; Oscillatoria
GCF_000317125.1_ASM31712v1	WP_015155916.1	P	K	-	-	-	+	-	Bacteria; Terrabacteria group; Cyanobacteria/Melainabacteria group
GCF_000317305.3_ASM31730v3	WP_019513478.1	P	K	-	-	-	-	-	Bacteria; Terrabacteria group; Actinobacteria; Actinobacteria; Corynebacteriales
GCF_000317435.1_ASM31743v1	WP_015198698.1	P	K	-	-	-	-	-	Bacteria; Terrabacteria group; Cyanobacteria/Melainabacteria group; Cyanobacteria; Nostocales; Rivulariaceae; Calothrix
GCF_000317475.1_ASM31747v1	WP_041622404.1	P	K	-	-	-	-	-	Bacteria; Terrabacteria group; Cyanobacteria/Melainabacteria group; Cyanobacteria; Oscillatoriophycideae; Oscillatoriales; Oscillatoriaceae; Oscillatoria
GCF_000317495.1_ASM31749v1	WP_015203321.1	P	K	-	-	-	+	-	Bacteria; Terrabacteria group; Cyanobacteria/Melainabacteria group; Cyanobacteria; Oscillatoriophycideae; Oscillatoriales; Gomontiellaceae; Crinalium
GCF_000317575.1_ASM31757v1	WP_015195282.1	P	K	-	-	-	-	-	Bacteria; Terrabacteria group; Cyanobacteria/Melainabacteria group; Cyanobacteria; Pleurocapsales; Dermocarpellaceae; Stanieria
GCF_000317615.1_ASM31761v1	WP_015229397.1	P	K	-	-	-	-	-	Bacteria; Terrabacteria group; Cyanobacteria/Melainabacteria group; Cyanobacteria; Synechococcales; Synechococcaceae; Dactylococcopsis
GCF_000317675.1_ASM31767v1	WP_015220379.1	P	K	-	-	-	-	-	Bacteria; Terrabacteria group; Cyanobacteria/Melainabacteria group; Cyanobacteria; Oscillatoriophycideae; Chroococcales; Cyanobacteriaceae; Cyanobacterium
GCF_000317695.1_ASM31769v1	WP_015212530.1	P	K	-	-	-	+	-	Bacteria; Terrabacteria group; Cyanobacteria/Melainabacteria group; Cyanobacteria; Nostocales; Nostocaceae; Anabaena
GCF_000317835.1_ASM31783v1	WP_015234080.1	M	R	-	-	-	-	-	Bacteria; Terrabacteria group; Deinococcus-Thermus; Deinococci; Deinococcales; Deinococcaceae; Deinococcus
GCF_000317855.1_ASM31785v1	WP_002993230.1	P	K	-	-	-	-	-	Bacteria; Terrabacteria group; Firmicutes; Bacilli; Lactobacillales; Streptococcaceae
GCF_000319245.1_ASM31924v1	WP_015237885.1	S	R	-	-	+	-	-	Bacteria; Proteobacteria; Betaproteobacteria; unclassified Betaproteobacteria; Candidatus Kinetoplastibacterium
GCF_000319575.2_ASM31957v2	WP_016353705.1	P	K	+	-	-	-	-	Bacteria; Proteobacteria; Gammaproteobacteria; Chromatiales; Ectothiorhodospiraceae; Spiribacter
GCF_000325665.1_ASM32566v1	WP_013244001.1	A	Q	-	-	-	-	-	Bacteria; Spirochaetes; Spirochaetia; Brachyspirales; Brachyspiraceae; Brachyspira
GCF_000325705.1_ASM32570v1	WP_015264054.1	P	K	-	-	-	+	-	Bacteria; FCB group; Bacteroidetes/Chlorobi group; Bacteroidetes; Cytophagia; Cytophagales; Cyclobacteriaceae; Echinicola
GCF_000328705.1_ASM32870v1	WP_015103678.1	P	K	-	-	-	-	-	Bacteria; Terrabacteria group; Actinobacteria; Actinobacteria; Pseudonocardiales; Pseudonocardiaceae; Saccharothrix
GCF_000330885.1_ASM33088v1	WP_015341611.1	P	K	+	-	-	-	-	Bacteria; Proteobacteria; Alphaproteobacteria; Rhizobiales; Rhizobiaceae; Rhizobium/Agrobacterium group
GCF_000331735.1_ASM33173v1	WP_015351882.1	P	K	+	-	-	+	-	Bacteria; Proteobacteria; delta/epsilon subdivisions; Deltaproteobacteria; Myxococcales; Cystobacterineae; Myxococcaceae; Myxococcus
GCF_000331995.1_ASM33199v1	WP_015358244.1	P	K	-	-	-	-	-	Bacteria; Terrabacteria group; Firmicutes; Clostridia; Clostridiales; Hungateiclostridiaceae; Thermoclostridium
GCF_000332115.1_ASM33211v1	WP_015363504.1	P	K	-	-	-	+	-	Bacteria; FCB group; Bacteroidetes/Chlorobi group; Bacteroidetes; Flavobacteriia; Flavobacteriales; Flavobacteriaceae; Nonlabens
GCF_000332735.1_ASM33273v1	WP_002465773.1	P	K	-	-	-	-	-	Bacteria; Terrabacteria group; Firmicutes; Bacilli
GCF_000340435.2_ASM34043v3	WP_047316552.1	P	K	-	-	-	-	-	Bacteria; Terrabacteria group; Actinobacteria; Actinobacteria; Corynebacteriales; Mycobacteriaceae; Mycobacterium
GCF_000340885.1_ASM34088v1	WP_015392816.1	P	K	-	-	-	-	-	Bacteria; Terrabacteria group; Firmicutes; Clostridia; Clostridiales; Clostridiaceae; Clostridium
GCF_000341345.1_ASM34134v1	WP_015400995.1	P	K	-	-	-	-	-	Bacteria; Terrabacteria group; Actinobacteria; Actinobacteria; Corynebacteriales; Corynebacteriaceae; Corynebacterium
GCF_000341355.1_ASM34135v1	WP_015398512.1	P	K	-	-	-	-	-	Bacteria; Proteobacteria; Alphaproteobacteria; Rhizobiales; Bartonellaceae; Bartonella
GCF_000341385.1_ASM34138v1	WP_010705793.1	P	K	-	-	-	-	-	Bacteria; Proteobacteria; Alphaproteobacteria; Rhizobiales; Bartonellaceae; Bartonella
GCF_000341395.1_ASM34139v1	WP_015403968.1	P	K	+	-	-	-	-	Bacteria; Proteobacteria; delta/epsilon subdivisions; Deltaproteobacteria; Desulfobacterales; Desulfobulbaceae; Desulfocapsa
GCF_000344785.1_ASM34478v1	WP_015651405.1	P	K	-	-	-	-	-	Bacteria; Terrabacteria group; Actinobacteria; Actinobacteria; Corynebacteriales; Corynebacteriaceae
GCF_000347635.1_ASM34763v1	WP_034898594.1	P	K	+	+	-	-	-	Bacteria; Proteobacteria; Gammaproteobacteria; Alteromonadales; Alteromonadaceae; Paraglaciecola
GCF_000347695.1_ASM34769v1	WP_015450694.1	P	K	-	-	-	-	-	Bacteria; Terrabacteria group; Actinobacteria; Actinobacteria; Bifidobacteriales; Bifidobacteriaceae
GCF_000349975.1_ASM34997v1	WP_002956382.1	P	K	-	-	-	-	-	Bacteria; Proteobacteria; delta/epsilon subdivisions; Epsilonproteobacteria; Campylobacterales; Helicobacteraceae; Helicobacter
GCF_000354175.2_ASM35417v2	WP_005381500.1	P	K	+	+	-	-	-	Bacteria; Proteobacteria; Gammaproteobacteria; Vibrionales; Vibrionaceae
GCF_000355675.1_ASM35567v1	WP_015486135.1	S	R	+	+	+	-	-	Bacteria; Proteobacteria; Gammaproteobacteria; Oceanospirillales; Oceanospirillaceae; Thalassolituus
GCF_000367205.1_ASM36720v1	WP_015582678.1	P	K	-	-	-	-	-	Bacteria; Terrabacteria group; Actinobacteria; Actinobacteria; Propionibacteriales
GCF_000376585.1_ASM37658v1	WP_015588025.1	P	K	-	-	-	-	-	Bacteria; Proteobacteria; Alphaproteobacteria; Rickettsiales; Anaplasmataceae; Wolbachieae; Wolbachia
GCF_000376645.1_ASM37664v1	WP_006250738.1	P	K	+	+	-	-	-	Bacteria; Proteobacteria; Gammaproteobacteria; Pasteurellales; Pasteurellaceae; Mannheimia
GCF_000380335.1_ASM38033v1	WP_012700159.1	S	R	-	-	+	-	-	Bacteria; Proteobacteria; Gammaproteobacteria; Pseudomonadales; Pseudomonadaceae; Azotobacter group; Azotobacter
GCF_000385925.1_ASM38592v1	WP_015605685.1	P	K	-	-	-	-	-	Bacteria; Terrabacteria group; Firmicutes; Bacilli; Lactobacillales; Streptococcaceae; Streptococcus
GCF_000397205.1_ASM39720v1	WP_007931398.1	S	R	-	-	+	-	-	Bacteria; Proteobacteria; Gammaproteobacteria; Pseudomonadales; Pseudomonadaceae
GCF_000400955.1_ASM40095v1	WP_016340658.1	S	R	-	-	-	-	-	Bacteria; Terrabacteria group; Tenericutes; Mollicutes; Entomoplasmatales; Spiroplasmataceae; Spiroplasma
GCF_000412695.1_ASM41269v1	WP_016493238.1	S	R	-	-	+	-	-	Bacteria; Proteobacteria; Gammaproteobacteria; Pseudomonadales; Pseudomonadaceae; Pseudomonas; Pseudomonas aeruginosa group
GCF_000422085.1_ASM42208v1	WP_020824887.1	P	K	+	+	-	-	-	Bacteria; Proteobacteria; Gammaproteobacteria; Enterobacterales; Yersiniaceae
GCF_000439435.1_ASM43943v1	WP_020834144.1	T	R	-	-	-	-	-	Bacteria; Terrabacteria group; Tenericutes; Mollicutes; Entomoplasmatales; Spiroplasmataceae; Spiroplasma
GCF_000444875.1_ASM44487v1	WP_020938844.1	P	K	-	-	-	-	-	Bacteria; Terrabacteria group; Actinobacteria; Actinobacteria; Streptomycetales; Streptomycetaceae
GCF_000444995.1_ASM44499v1	WP_041527025.1	P	K	+	-	-	-	-	Bacteria; Proteobacteria; Alphaproteobacteria; Rhodobacterales; Rhodobacteraceae; Paracoccus
GCF_000445425.4_ASM44542v4	WP_020954603.1	M	R	-	-	-	-	-	Bacteria; Spirochaetes; Spirochaetia; Spirochaetales; Borreliaceae; Borrelia
GCF_000447675.1_ASM44767v1	WP_020965606.1	P	K	+	-	-	-	-	Bacteria; Spirochaetes; Spirochaetia; Spirochaetales; Spirochaetaceae; Treponema
GCF_000454045.1_ASM45404v1	WP_003944958.1	P	K	-	-	-	-	-	Bacteria; Terrabacteria group; Actinobacteria; Actinobacteria; Corynebacteriales; Nocardiaceae
GCF_000468615.2_ASM46861v2	WP_024481236.1	P	K	-	-	-	+	-	Bacteria; FCB group; Bacteroidetes/Chlorobi group; Bacteroidetes; Flavobacteriia; Flavobacteriales; Flavobacteriaceae
GCF_000470775.1_ASM47077v1	WP_021754721.1	P	K	-	-	-	-	-	Bacteria; Terrabacteria group; Actinobacteria; Actinobacteria; Micrococcales; Microbacteriaceae; Leifsonia
GCF_000471025.2_ASM47102v2	WP_021828387.1	G	K	-	-	-	-	-	Bacteria; PVC group; Chlamydiae; Chlamydiia; Chlamydiales; Chlamydiaceae; Chlamydia/Chlamydophila group; Chlamydia
GCF_000471025.2_ASM47102v2	WP_021828638.1	P	K	-	-	-	-	-	Bacteria; PVC group; Chlamydiae; Chlamydiia; Chlamydiales; Chlamydiaceae; Chlamydia/Chlamydophila group; Chlamydia
GCF_000477415.1_ASM47741v1	WP_022768898.1	T	M	-	-	-	-	-	Bacteria; Terrabacteria group; Tenericutes; Mollicutes; Mycoplasmatales; Mycoplasmataceae; Mycoplasma
GCF_000478885.1_ASM47888v1	WP_022739459.1	P	K	-	-	-	-	-	Bacteria; Terrabacteria group; Actinobacteria; Coriobacteriia; Eggerthellales; Eggerthellaceae; Adlercreutzia
GCF_000485905.1_ASM48590v1	WP_023367569.1	P	K	+	-	-	-	-	Bacteria; Proteobacteria; Gammaproteobacteria; Chromatiales; Ectothiorhodospiraceae; Spiribacter
GCF_000493735.1_ASM49373v1	WP_023177166.1	P	K	-	-	-	-	-	Bacteria; Terrabacteria group; Firmicutes; Bacilli; Lactobacillales; Carnobacteriaceae; Carnobacterium
GCF_000494755.1_ASM49475v1	WP_023560725.1	P	K	-	-	-	-	-	Bacteria; Terrabacteria group; Actinobacteria; Actinobacteria; Micromonosporales; Micromonosporaceae; Actinoplanes
GCF_000495935.2_ASM49593v2	WP_009091817.1	P	K	-	-	-	+	-	Bacteria; FCB group; Bacteroidetes/Chlorobi group; Bacteroidetes; Flavobacteriia; Flavobacteriales; Flavobacteriaceae
GCF_000497525.1_ASM49752v2	WP_000626513.1	P	K	-	-	-	-	-	Bacteria; Terrabacteria group; Firmicutes; Bacilli; Bacillales; Bacillaceae
GCF_000500935.1_ASM50093v1	WP_023789138.1	T	R	-	-	-	-	-	Bacteria; Terrabacteria group; Tenericutes; Mollicutes; Entomoplasmatales; Spiroplasmataceae; Spiroplasma
GCF_000503895.1_ASM50389v1	WP_041318747.1	P	K	+	-	-	-	-	Bacteria; Proteobacteria; Alphaproteobacteria; Rhizobiales; Hyphomicrobiaceae; Hyphomicrobium
GCF_000507245.1_ASM50724v1	WP_041401626.1	P	K	+	-	-	-	-	Bacteria; Spirochaetes; Spirochaetia; Spirochaetales; Spirochaetaceae; Salinispira
GCF_000508245.1_ASM50824v1	WP_024071258.1	T	M	+	-	-	-	-	Bacteria; Terrabacteria group; Tenericutes; Mollicutes; Mycoplasmatales; Mycoplasmataceae; Mycoplasma
GCF_000511305.1_ASM51130v1	WP_006551441.1	P	K	-	-	-	-	-	Bacteria; Terrabacteria group; Actinobacteria; Actinobacteria; Corynebacteriales; Nocardiaceae
GCF_000512205.2_ASM51220v2	WP_025294494.1	P	K	-	-	-	+	-	Bacteria; Proteobacteria; Alphaproteobacteria; Sphingomonadales; Sphingomonadaceae; Sphingomonas
GCF_000512355.1_ASM51235v1	WP_025384856.1	P	K	+	-	-	-	-	Bacteria; Proteobacteria; Gammaproteobacteria; Legionellales; Legionellaceae
GCF_000512895.1_ASM51289v1	WP_015042509.1	P	K	-	-	-	-	-	Bacteria; Terrabacteria group; Firmicutes; Clostridia; Clostridiales; Peptococcaceae
GCF_000512915.1_ASM51291v1	WP_025279195.1	P	K	-	-	-	-	-	Bacteria; FCB group; Bacteroidetes/Chlorobi group; Bacteroidetes; Bacteroidia; Bacteroidales; Barnesiellaceae; Barnesiella
GCF_000513215.1_DB11	WP_004929666.1	P	K	+	+	-	-	-	Bacteria; Proteobacteria; Gammaproteobacteria
GCF_000517605.1_ASM51760v1	WP_017962511.1	P	K	+	-	-	-	-	Bacteria; Proteobacteria; Alphaproteobacteria; Rhizobiales; Rhizobiaceae; Rhizobium/Agrobacterium group
GCF_000521505.1_ASM52150v1	WP_025372033.1	S	R	-	-	+	-	-	Bacteria; Proteobacteria; Betaproteobacteria; Burkholderiales; Alcaligenaceae; Advenella
GCF_000521565.1_ASM52156v1	WP_025368684.1	P	K	+	-	-	-	-	Bacteria; Proteobacteria; Gammaproteobacteria; Enterobacterales; Erwiniaceae; Buchnera
GCF_000523235.1_ASM52323v1	WP_025350726.1	P	K	-	-	-	-	-	Bacteria; Terrabacteria group; Actinobacteria; Actinobacteria; Corynebacteriales; Nocardiaceae; Nocardia
GCF_000525635.1_ASM52563v1	WP_025356266.1	P	K	-	-	-	-	-	Bacteria; Terrabacteria group; Actinobacteria; Actinobacteria; Pseudonocardiales; Pseudonocardiaceae; Kutzneria
GCF_000525655.1_ASM52565v1	WP_025402746.1	P	K	-	-	-	-	-	Bacteria; Terrabacteria group; Actinobacteria; Actinobacteria; Corynebacteriales; Corynebacteriaceae; Corynebacterium
GCF_000525675.1_ASM52567v1	WP_025308540.1	P	K	+	-	-	+	-	Bacteria; Proteobacteria; Oligoflexia; Bdellovibrionales; Bdellovibrionaceae; Bdellovibrio
GCF_000550785.1_ASM55078v1	WP_006823631.1	P	K	-	-	-	-	-	Bacteria; Terrabacteria group; Actinobacteria; Actinobacteria; Corynebacteriales; Corynebacteriaceae
GCF_000550805.1_ASM55080v1	WP_025252920.1	P	K	-	-	-	-	-	Bacteria; Terrabacteria group; Actinobacteria; Actinobacteria; Corynebacteriales; Corynebacteriaceae; Corynebacterium
GCF_000565175.1_ASM56517v1	WP_025362958.1	S	R	-	-	-	-	-	Bacteria; Terrabacteria group; Tenericutes; Mollicutes; Entomoplasmatales; Spiroplasmataceae; Spiroplasma
GCF_000565215.1_ASM56521v1	WP_025250846.1	T	R	-	-	-	-	-	Bacteria; Terrabacteria group; Tenericutes; Mollicutes; Entomoplasmatales; Spiroplasmataceae; Spiroplasma
GCF_000568815.1_ASM56881v1	WP_025343981.1	P	K	-	-	-	-	-	Bacteria; Proteobacteria; delta/epsilon subdivisions; Epsilonproteobacteria; Campylobacterales; Campylobacteraceae; Sulfurospirillum
GCF_000576555.1_ASM57655v1	WP_044002435.1	P	K	-	-	-	+	-	Bacteria; FCB group; Bacteroidetes/Chlorobi group; Bacteroidetes; Cytophagia; Cytophagales; Hymenobacteraceae; Hymenobacter
GCF_000583875.1_ASM58387v1	WP_020356558.1	P	K	-	-	-	-	-	Bacteria; PVC group; Chlamydiae; Chlamydiia; Chlamydiales; Chlamydiaceae; Chlamydia/Chlamydophila group
GCF_000583875.1_ASM58387v1	WP_038500472.1	G	K	-	-	-	-	-	Bacteria; PVC group; Chlamydiae; Chlamydiia; Chlamydiales; Chlamydiaceae; Chlamydia/Chlamydophila group; Chlamydia
GCF_000590475.1_ASM59047v1	WP_025242341.1	S	R	-	-	+	-	-	Bacteria; Proteobacteria; Gammaproteobacteria; Pseudomonadales; Pseudomonadaceae; Pseudomonas; Pseudomonas stutzeri group; Pseudomonas stutzeri subgroup
GCF_000590555.1_ASM59055v1	WP_020976343.1	P	K	-	-	-	-	-	Bacteria; Terrabacteria group; Actinobacteria; Actinobacteria; Corynebacteriales; Corynebacteriaceae; Corynebacterium
GCF_000599985.1_ASM59998v1	WP_025314677.1	P	K	+	-	-	-	-	Bacteria; Proteobacteria; Gammaproteobacteria; Orbales; Orbaceae; Gilliamella
GCF_000604125.1_ASM60412v1	WP_010881973.1	P	K	+	-	-	-	-	Bacteria; Spirochaetes; Spirochaetia; Spirochaetales; Spirochaetaceae; Treponema
GCF_000612055.1_ASM61205v1	WP_024964131.1	P	K	-	-	-	-	-	Bacteria; Terrabacteria group; Actinobacteria; Actinobacteria; Actinomycetales; Actinomycetaceae; Trueperella
GCF_000612485.1_ASM61248v1	WP_005016087.1	S	R	-	-	-	-	-	Bacteria; Proteobacteria; Betaproteobacteria; Burkholderiales; Alcaligenaceae; Bordetella
GCF_000612685.1_scf7180000000004	WP_043683651.1	S	R	-	-	+	-	-	Bacteria; Proteobacteria; Betaproteobacteria; Burkholderiales; Alcaligenaceae; Castellaniella
GCF_000626635.1_ASM62663v1	WP_038557117.1	P	K	-	-	-	-	-	Bacteria; FCB group; Bacteroidetes/Chlorobi group; Bacteroidetes; Bacteroidia; Marinilabiliales; Prolixibacteraceae; Draconibacterium
GCF_000626675.1_ASM62667v1	WP_038548480.1	P	K	-	-	-	-	-	Bacteria; Terrabacteria group; Actinobacteria; Actinobacteria; Corynebacteriales; Corynebacteriaceae; Corynebacterium
GCF_000632985.1_ASM63298v1	WP_038558922.1	P	K	-	-	-	-	-	Bacteria; Proteobacteria; Alphaproteobacteria; Rickettsiales; Anaplasmataceae; Neorickettsia
GCF_000635915.2_ASM63591v2	WP_025978197.1	P	K	-	-	-	+	-	Bacteria; Proteobacteria; Alphaproteobacteria; Caulobacterales; Caulobacteraceae; Brevundimonas
GCF_000648515.1_ASM64851v1	WP_006686282.1	P	K	+	+	-	-	-	Bacteria; Proteobacteria; Gammaproteobacteria; Enterobacterales; Enterobacteriaceae
GCF_000695835.1_ASM69583v1	WP_038562106.1	Q	R	-	-	-	-	-	Bacteria; Terrabacteria group; Tenericutes; Mollicutes; Mycoplasmatales; Mycoplasmataceae; Mycoplasma
GCF_000697965.2_ASM69796v2	WP_029742428.1	P	K	+	-	-	-	-	Bacteria; Proteobacteria; Alphaproteobacteria; Rhizobiales; Rhizobiaceae
GCF_000699505.1_ASM69950v1	WP_038502412.1	P	K	-	-	-	-	-	Bacteria; Terrabacteria group; Actinobacteria; Actinobacteria; Micrococcales; Microbacteriaceae; Luna cluster; Luna-1 subcluster; Rhodoluna
GCF_000706685.1_ASM70668v1	WP_029377206.1	P	K	-	-	-	-	-	Bacteria; Terrabacteria group; Firmicutes; Bacilli; Bacillales; Staphylococcaceae; Staphylococcus
GCF_000723165.1_JAG1	WP_038490460.1	S	R	-	-	+	-	-	Bacteria; Proteobacteria; Betaproteobacteria; Burkholderiales; Oxalobacteraceae; Janthinobacterium
GCF_000723425.2_E11	WP_020728536.1	P	K	-	-	-	-	-	Bacteria; Terrabacteria group; Actinobacteria; Actinobacteria; Corynebacteriales; Mycobacteriaceae; Mycobacterium
GCF_000723465.1_Rb803	WP_022286889.1	P	K	-	-	-	-	-	Bacteria; Terrabacteria group; Firmicutes; Clostridia; Clostridiales; Ruminococcaceae
GCF_000723505.1_Mucivorans_M3_Nelson-Bomar-Fixed	WP_038657332.1	P	K	-	-	-	-	-	Bacteria; FCB group; Bacteroidetes/Chlorobi group; Bacteroidetes; Bacteroidia; Bacteroidales; Rikenellaceae; Mucinivorans
GCF_000724485.1_ASM72448v1	WP_004435591.1	P	K	-	-	-	-	-	Bacteria; Terrabacteria group; Firmicutes; Bacilli; Bacillales; Bacillaceae; Bacillus
GCF_000724605.1_ASM72460v1	WP_016442826.1	P	K	-	-	-	-	-	Bacteria; Terrabacteria group; Actinobacteria; Actinobacteria; Actinomycetales; Actinomycetaceae
GCF_000724625.1_ASM72462v1	WP_038474210.1	P	K	-	-	-	-	-	Bacteria; Terrabacteria group; Armatimonadetes; Fimbriimonadia; Fimbriimonadales; Fimbriimonadaceae; Fimbriimonas
GCF_000724775.3_ASM72477v3	WP_008179859.1	P	K	-	-	-	-	-	Bacteria; Terrabacteria group; Firmicutes; Bacilli; Bacillales
GCF_000725405.1_ASM72540v1	WP_006943829.1	P	K	-	-	-	-	-	Bacteria; Terrabacteria group; Actinobacteria; Actinobacteria; Micrococcales; Dermacoccaceae
GCF_000730165.1_ASM73016v2	WP_004271878.1	P	K	+	+	-	-	-	Bacteria; Proteobacteria; Alphaproteobacteria; Rhodospirillales; Rhodospirillaceae; Nitrospirillum
GCF_000730385.1_ASM73038v1	WP_044055985.1	P	K	+	+	-	-	-	Bacteria; Proteobacteria; Gammaproteobacteria; Alteromonadales; Alteromonadaceae; Alteromonas
GCF_000731315.1_RG540_Ch_pA	WP_038591328.1	P	K	+	-	-	-	-	Bacteria; Proteobacteria; Alphaproteobacteria; Rhizobiales; Rhizobiaceae; Rhizobium/Agrobacterium group
GCF_000732925.1_ASM73292v1	WP_038515597.1	P	K	+	-	-	-	-	Bacteria; Terrabacteria group; Actinobacteria; Actinobacteria; Pseudonocardiales; Pseudonocardiaceae
GCF_000732945.1_ASM73294v1	WP_038605294.1	P	K	-	-	-	-	-	Bacteria; Terrabacteria group; Actinobacteria; Actinobacteria; Corynebacteriales; Corynebacteriaceae; Corynebacterium
GCF_000734015.1_ASM73401v1	WP_038063060.1	I	K	-	-	-	-	-	Bacteria; Thermodesulfobacteria; Thermodesulfobacteria; Thermodesulfobacteriales; Thermodesulfobacteriaceae; Thermodesulfobacterium
GCF_000736415.1_ASM73641v1	WP_038454728.1	P	K	-	-	-	-	-	Bacteria; Proteobacteria; delta/epsilon subdivisions; Epsilonproteobacteria; Campylobacterales; Campylobacteraceae; Campylobacter
GCF_000737325.1_ASM73732v2	WP_053233683.1	P	K	+	-	-	+	-	Bacteria; Proteobacteria; delta/epsilon subdivisions; Deltaproteobacteria; Myxococcales; Sorangiineae; Sandaracinaceae; Sandaracinus
GCF_000737865.1_ASM73786v1	WP_033490946.1	P	K	-	-	-	-	-	Bacteria; Terrabacteria group; Actinobacteria; Actinobacteria; Bifidobacteriales; Bifidobacteriaceae
GCF_000739085.1_ASM73908v1	WP_017983080.1	P	K	-	-	-	-	-	Bacteria; Terrabacteria group; Actinobacteria; Actinobacteria; Pseudonocardiales; Pseudonocardiaceae; Amycolatopsis
GCF_000739375.1_ASM73937v1	WP_003056627.1	G	R	-	-	+	-	-	Bacteria; Proteobacteria; Betaproteobacteria; Burkholderiales; Comamonadaceae
GCF_000739475.1_ASM73947v1	WP_006068769.1	T	R	-	-	-	-	-	Bacteria; Spirochaetes; Spirochaetia; Spirochaetales; Borreliaceae; Borreliella
GCF_000743945.1_ASM74394v1	WP_038501009.1	S	R	-	-	+	-	-	Bacteria; Proteobacteria; Betaproteobacteria; Burkholderiales; Alcaligenaceae; Basilea
GCF_000747315.1_ASM74731v1	WP_038611789.1	P	K	-	-	-	-	-	Bacteria; Terrabacteria group; Actinobacteria; Actinobacteria; Corynebacteriales; Corynebacteriaceae; Corynebacterium
GCF_000747585.1_ASM74758v1	WP_013772988.1	P	K	-	-	-	-	-	Bacteria; Terrabacteria group; Firmicutes; Bacilli; Lactobacillales; Enterococcaceae; Melissococcus
GCF_000750535.1_ASM75053v1	WP_009495493.1	P	K	-	-	-	-	-	Bacteria; Terrabacteria group; Firmicutes; Bacilli; Lactobacillales; Leuconostocaceae; Weissella
GCF_000754275.1_ASM75427v1	WP_005719907.1	P	K	+	+	-	-	-	Bacteria; Proteobacteria; Gammaproteobacteria; Pasteurellales
GCF_000755145.1_ASM75514v1	WP_044978791.1	P	K	+	-	-	-	-	Bacteria; Spirochaetes; Spirochaetia; Spirochaetales; Spirochaetaceae; Treponema
GCF_000756615.1_ASM75661v1	WP_042207480.1	P	K	-	-	-	-	-	Bacteria; Terrabacteria group; Firmicutes; Bacilli; Bacillales; Paenibacillaceae; Paenibacillus
GCF_000757785.1_ASM75778v1	WP_043081809.1	P	K	+	+	-	-	-	Bacteria; Proteobacteria; Gammaproteobacteria; Enterobacterales; Enterobacteriaceae; Pluralibacter
GCF_000757825.1_ASM75782v1	WP_038476416.1	P	K	+	+	-	-	-	Bacteria; Proteobacteria; Gammaproteobacteria; Enterobacterales; Enterobacteriaceae; Cedecea
GCF_000758685.1_ASM75868v1	WP_038697311.1	P	K	-	-	-	-	-	Bacteria; Terrabacteria group; Firmicutes; Bacilli; Bacillales; Paenibacillaceae; Paenibacillus
GCF_000759475.1_ASM75947v1	WP_034826669.1	P	K	+	+	-	-	-	Bacteria; Proteobacteria; Gammaproteobacteria
GCF_000761215.1_ASM76121v1	WP_043498973.1	P	K	-	-	-	-	-	Bacteria; Terrabacteria group; Actinobacteria; Actinobacteria; Streptomycetales; Streptomycetaceae
GCF_000763535.1_ASM76353v2	WP_021458016.1	P	K	+	+	-	-	-	Bacteria; Proteobacteria; Gammaproteobacteria; Vibrionales; Vibrionaceae
GCF_000763575.1_ASM76357v1	WP_009052330.1	P	K	-	-	-	-	-	Bacteria; Terrabacteria group; Firmicutes; Clostridia; Thermoanaerobacterales; Thermoanaerobacteraceae
GCF_000764535.1_ASM76453v1	WP_037530700.1	P	K	-	-	-	+	-	Bacteria; Proteobacteria; Alphaproteobacteria; Sphingomonadales; Sphingomonadaceae
GCF_000767055.1_ASM76705v1	WP_018021741.1	P	K	-	-	-	-	-	Bacteria; Terrabacteria group; Actinobacteria; Actinobacteria; Corynebacteriales; Corynebacteriaceae; Corynebacterium
GCF_000767465.1_ASM76746v1	WP_007011093.1	P	K	-	-	-	-	-	Bacteria; Proteobacteria; Alphaproteobacteria; Sphingomonadales; Sphingomonadaceae; Novosphingobium
GCF_000772105.1_ASM77210v1	WP_004743319.1	P	K	+	+	-	-	-	Bacteria; Proteobacteria; Gammaproteobacteria; Vibrionales; Vibrionaceae; Vibrio
GCF_000785105.2_ASM78510v2	WP_035167256.1	P	K	-	-	-	-	-	Bacteria; Terrabacteria group; Firmicutes; Bacilli; Lactobacillales; Lactobacillaceae; Lactobacillus
GCF_000785495.1_ASM78549v1	WP_038679307.1	P	K	-	-	-	-	-	Bacteria; Terrabacteria group; Actinobacteria; Actinobacteria; Propionibacteriales; Nocardioidaceae; Pimelobacter
GCF_000800475.2_ASM80047v2	WP_022857767.1	P	K	-	-	-	-	-	Bacteria; Terrabacteria group; Actinobacteria; Actinobacteria; Bifidobacteriales; Bifidobacteriaceae; Bifidobacterium
GCF_000801275.2_ASM80127v1	WP_004399838.1	P	K	+	+	-	-	-	Bacteria; Proteobacteria; Gammaproteobacteria; Vibrionales; Vibrionaceae; Vibrio
GCF_000801295.1_ASM80129v1	WP_043107568.1	P	K	+	-	-	-	-	Bacteria; Proteobacteria; Gammaproteobacteria; unclassified Gammaproteobacteria; unclassified Gammaproteobacteria (miscellaneous)
GCF_000802245.2_ASM80224v2	WP_039648992.1	P	K	+	-	-	-	-	Bacteria; Terrabacteria group; Actinobacteria; Actinobacteria; Streptomycetales; Streptomycetaceae
GCF_000803645.1_ASM80364v1	WP_039573784.1	P	K	-	-	-	-	-	Bacteria; Proteobacteria; Alphaproteobacteria; Sphingomonadales; Sphingomonadaceae; Sphingopyxis
GCF_000807275.1_ASM80727v1	WP_039103195.1	P	K	+	-	-	-	-	Bacteria; Proteobacteria; Gammaproteobacteria; Orbales; Orbaceae; Frischella
GCF_000812665.2_ASM81266v2	WP_039004621.1	P	K	-	-	-	-	-	Bacteria; Proteobacteria; Alphaproteobacteria; Rhodobacterales; Rhodobacteraceae; Halocynthiibacter
GCF_000815025.1_ASM81502v1	WP_039669765.1	P	K	+	-	-	+	-	Bacteria; Proteobacteria; Gammaproteobacteria; Legionellales; Coxiellaceae; Coxiella
GCF_000815225.1_ASM81522v1	WP_039123397.1	P	K	+	-	-	-	-	Bacteria; Proteobacteria; Gammaproteobacteria; Thiotrichales; Francisellaceae; Allofrancisella
GCF_000816145.1_ASM81614v1	WP_031505082.1	M	M	-	-	-	-	-	Bacteria; Thermotogae; Thermotogae; Thermotogales; Thermotogaceae; Pseudothermotoga
GCF_000817955.1_ASM81795v1	WP_039742127.1	P	K	+	-	-	-	-	Bacteria; Proteobacteria; delta/epsilon subdivisions; Deltaproteobacteria; Desulfuromonadales; Geobacteraceae; Geobacter
GCF_000818035.1_ASM81803v1	WP_003773652.1	G	R	-	-	+	-	-	Bacteria; Proteobacteria; Betaproteobacteria; Neisseriales; Neisseriaceae; Neisseria
GCF_000819445.1_ASM81944v1	WP_040085937.1	P	K	-	-	-	-	-	Bacteria; Terrabacteria group; Actinobacteria; Actinobacteria; Corynebacteriales; Corynebacteriaceae; Corynebacterium
GCF_000827005.1_ASM82700v1	WP_040255098.1	P	K	-	-	-	-	-	Bacteria; Terrabacteria group; Actinobacteria; Actinobacteria; Streptomycetales; Streptomycetaceae; Streptomyces; Streptomyces albus group
GCF_000827125.1_ASM82712v1	WP_040199273.1	P	K	+	-	-	-	-	Bacteria; Proteobacteria; delta/epsilon subdivisions; Deltaproteobacteria; Desulfuromonadales; Geobacteraceae; Geoalkalibacter
GCF_000828475.1_ASM82847v1	WP_045368606.1	P	K	-	-	-	-	-	Bacteria; Proteobacteria; Alphaproteobacteria; Rhizobiales; unclassified Rhizobiales; Methyloceanibacter
GCF_000828615.1_ASM82861v1	WP_041070200.1	P	K	+	-	-	-	-	Bacteria; Proteobacteria; Gammaproteobacteria; unclassified Gammaproteobacteria; Thiolapillus
GCF_000828655.1_ASM82865v1	WP_041077350.1	M	M	-	-	-	-	-	Bacteria; Thermotogae; Thermotogae; Thermotogales; Thermotogaceae; Thermotoga
GCF_000828675.1_ASM82867v1	WP_041082995.1	M	M	-	-	-	-	-	Bacteria; Thermotogae; Thermotogae; Thermotogales; Thermotogaceae; Thermotoga
GCF_000828835.1_ASM82883v1	WP_045472253.1	P	K	+	-	-	-	-	Bacteria; Proteobacteria; Gammaproteobacteria; Thiotrichales; Thiotrichaceae; Thioploca
GCF_000829035.1_ASM82903v1	WP_003566713.1	P	K	-	-	-	-	-	Bacteria; Terrabacteria group; Firmicutes; Bacilli; Lactobacillales; Lactobacillaceae
GCF_000829315.1_ASM82931v1	WP_041046048.1	P	K	-	-	-	-	-	Bacteria; Proteobacteria; Alphaproteobacteria; Rickettsiales; Anaplasmataceae; Wolbachieae; Wolbachia
GCF_000829395.1_ASM82939v1	WP_041093451.1	P	K	-	-	-	-	-	Bacteria; Terrabacteria group; Firmicutes; Bacilli; Lactobacillales; Lactobacillaceae; Lactobacillus
GCF_000830885.1_ASM83088v1	WP_011309346.1	P	K	+	-	-	-	-	Bacteria; Terrabacteria group; Chloroflexi; Dehalococcoidia; Dehalococcoidales; Dehalococcoidaceae; Dehalococcoides
GCF_000830885.1_ASM83088v1	WP_034376585.1	-	K	+	-	-	-	-	Bacteria; Terrabacteria group; Chloroflexi; Dehalococcoidia; Dehalococcoidales; Dehalococcoidaceae; Dehalococcoides
GCF_000831005.1_ASM83100v1	WP_041332400.1	P	K	+	+	-	-	-	Bacteria; Proteobacteria; Gammaproteobacteria; Alteromonadales; Alteromonadaceae; Marinobacter
GCF_000831485.1_ASM83148v1	WP_003102055.1	P	K	-	-	-	-	-	Bacteria; Terrabacteria group; Firmicutes; Bacilli; Lactobacillales; Streptococcaceae; Streptococcus
GCF_000831645.3_ASM83164v3	WP_041499602.1	P	K	-	-	-	-	-	Bacteria; Terrabacteria group; Firmicutes; Bacilli; Lactobacillales; Lactobacillaceae; Lactobacillus
GCF_000832305.1_ASM83230v1	WP_043347839.1	S	R	-	-	+	-	-	Bacteria; Proteobacteria; Betaproteobacteria; Burkholderiales; Burkholderiaceae; Cupriavidus
GCF_000832605.1_ASM83260v1	WP_002129052.1	P	K	-	-	-	-	-	Bacteria; Terrabacteria group; Firmicutes; Bacilli; Bacillales; Bacillaceae
GCF_000832985.1_ASM83298v1	WP_013059155.1	P	K	-	-	-	-	-	Bacteria; Terrabacteria group; Firmicutes; Bacilli; Bacillales; Bacillaceae
GCF_000833025.1_ASM83302v1	WP_041891530.1	P	K	-	-	-	+	-	Bacteria; FCB group; Bacteroidetes/Chlorobi group; Bacteroidetes; Flavobacteriia; Flavobacteriales; Flavobacteriaceae; Myroides
GCF_000833105.2_ASM83310v2	WP_023974718.1	P	K	+	-	-	-	-	Bacteria; Terrabacteria group; Firmicutes; Clostridia; Clostridiales; Clostridiaceae
GCF_000833575.1_ASM83357v1	WP_042531048.1	P	K	-	-	-	-	-	Bacteria; Terrabacteria group; Actinobacteria; Actinobacteria; Corynebacteriales; Corynebacteriaceae
GCF_000835165.1_ASM83516v1	WP_042621512.1	P	K	-	-	-	-	-	Bacteria; Terrabacteria group; Actinobacteria; Actinobacteria; Corynebacteriales; Corynebacteriaceae; Corynebacterium
GCF_000875755.1_ASM87575v1	WP_004427057.1	T	R	-	-	-	-	-	Bacteria; Terrabacteria group; Tenericutes; Mollicutes; Mycoplasmatales; Mycoplasmataceae; Mycoplasma
GCF_000940805.1_ASM94080v1	WP_044616924.1	P	K	+	+	-	-	-	Bacteria; Proteobacteria; Gammaproteobacteria; Oceanospirillales; Saccharospirillaceae; Gynuella
GCF_000940845.1_ASM94084v1	WP_080516189.1	P	K	-	-	-	-	-	Bacteria; Terrabacteria group; Actinobacteria; Actinobacteria; Propionibacteriales; Propionibacteriaceae; Propionibacterium
GCF_000940995.1_ASM94099v1	WP_039459773.1	P	K	+	+	-	-	-	Bacteria; Proteobacteria; Gammaproteobacteria; Vibrionales; Vibrionaceae; Photobacterium
GCF_000941055.1_ASM94105v1	WP_044638984.1	P	K	-	-	-	+	-	Bacteria; FCB group; Bacteroidetes/Chlorobi group; Bacteroidetes; Flavobacteriia; Flavobacteriales; Flavobacteriaceae; Siansivirga
GCF_000953135.1_LFA	WP_045094588.1	P	K	+	+	-	-	-	Bacteria; Proteobacteria; Gammaproteobacteria; Legionellales; Legionellaceae; Legionella
GCF_000953195.1_Acholeplasma_oculi_strain_19L	WP_045749529.1	S	R	-	-	-	-	-	Bacteria; Terrabacteria group; Tenericutes; Mollicutes; Acholeplasmatales; Acholeplasmataceae; Acholeplasma
GCF_000953215.1_DG5	WP_034840199.1	P	K	-	-	-	-	-	Bacteria; Terrabacteria group; Firmicutes; Clostridia; Clostridiales; Ruminococcaceae; unclassified Ruminococcaceae
GCF_000953475.1_MfumSolVChr1	WP_009061321.1	P	N	-	-	-	+	-	Bacteria; PVC group; Verrucomicrobia; Methylacidiphilae; Methylacidiphilales; Methylacidiphilaceae
GCF_000953635.1_LMI	WP_045100242.1	P	K	+	+	-	-	-	Bacteria; Proteobacteria; Gammaproteobacteria; Legionellales; Legionellaceae; Tatlockia
GCF_000953655.1_LHA	WP_045104953.1	P	K	+	+	-	-	-	Bacteria; Proteobacteria; Gammaproteobacteria; Legionellales; Legionellaceae; Legionella
GCF_000953695.1_AWOD1	WP_045101067.1	P	K	+	+	-	-	-	Bacteria; Proteobacteria; Gammaproteobacteria; Vibrionales; Vibrionaceae; Aliivibrio
GCF_000953735.1_MVIS1	WP_045108850.1	P	K	+	+	-	-	-	Bacteria; Proteobacteria; Gammaproteobacteria; Alteromonadales; Moritellaceae; Moritella
GCF_000954135.1_ASM95413v2	WP_096745072.1	S	R	-	-	+	-	-	Bacteria; Proteobacteria; Betaproteobacteria; Burkholderiales; Burkholderiaceae
GCF_000959245.1_ASM95924v1	WP_042583486.1	S	R	-	-	+	-	-	Bacteria; Proteobacteria; Betaproteobacteria; Burkholderiales; Burkholderiaceae
GCF_000959725.1_ASM95972v1	WP_013697093.1	S	R	-	-	+	-	-	Bacteria; Proteobacteria; Betaproteobacteria; Burkholderiales; Burkholderiaceae; Burkholderia
GCF_000960975.1_ASM96097v1	WP_045680725.1	P	K	+	-	-	-	-	Bacteria; Proteobacteria; Alphaproteobacteria; Rhizobiales; Aurantimonadaceae; Martelella
GCF_000961095.1_ASM96109v1	WP_045672697.1	P	K	-	-	-	-	-	Bacteria; Terrabacteria group; Firmicutes; Bacilli; Bacillales; Paenibacillaceae; Paenibacillus
GCF_000963865.1_ASM96386v1	WP_045802856.1	P	K	-	-	-	+	-	Bacteria; FCB group; Bacteroidetes/Chlorobi group; Bacteroidetes; Flavobacteriia; Flavobacteriales; Flavobacteriaceae; Muricauda
GCF_000964565.1_ASM96456v1	WP_004722438.1	P	K	+	+	-	-	-	Bacteria; Proteobacteria; Gammaproteobacteria; Enterobacterales; Yersiniaceae; Yersinia
GCF_000967305.2_ASM96730v2	WP_003802564.1	S	R	-	-	+	-	-	Bacteria; Proteobacteria; Betaproteobacteria; Burkholderiales; Alcaligenaceae
GCF_000967895.1_ASM96789v1	WP_046007668.1	P	K	+	+	-	-	-	Bacteria; Proteobacteria; Gammaproteobacteria; Oceanospirillales; Oceanospirillaceae; Oleispira
GCF_000968535.2_ASM96853v1	WP_014149403.1	P	K	+	-	-	-	-	Bacteria; Proteobacteria; Gammaproteobacteria; Methylococcales; Methylococcaceae; Methylomicrobium
GCF_000972865.1_ASM97286v1	WP_052629664.1	P	K	-	-	-	-	-	Bacteria; Proteobacteria; Gammaproteobacteria; Xanthomonadales; Xanthomonadaceae; Pseudoxanthomonas
GCF_000973105.1_ASM97310v1	WP_013995846.1	P	K	-	-	-	+	-	Bacteria; FCB group; Bacteroidetes/Chlorobi group; Bacteroidetes; Flavobacteriia; Flavobacteriales; Flavobacteriaceae; Zobellia
GCF_000973505.1_ASM97350v1	WP_046288618.1	P	K	-	-	-	-	-	Bacteria; Proteobacteria; Gammaproteobacteria; Enterobacterales; Enterobacteriaceae; unclassified Enterobacteriaceae; ant, tsetse, mealybug, aphid, etc. endosymbionts; ant endosymbionts; Candidatus Blochmannia; unclassified Candidatus Blochmannia endosymbionts
GCF_000973545.1_ASM97354v1	WP_071840883.1	P	K	-	-	-	-	-	Bacteria; Proteobacteria; Gammaproteobacteria; Enterobacterales; Enterobacteriaceae; unclassified Enterobacteriaceae; ant, tsetse, mealybug, aphid, etc. endosymbionts; ant endosymbionts; Candidatus Blochmannia; unclassified Candidatus Blochmannia endosymbionts
GCF_000973625.1_ASM97362v1	WP_046330550.1	S	R	-	-	+	-	-	Bacteria; Proteobacteria; Betaproteobacteria; Burkholderiales; Burkholderiaceae; Polynucleobacter
GCF_000974425.1_ASM97442v1	WP_046578229.1	P	K	-	-	-	-	-	Bacteria; FCB group; Bacteroidetes/Chlorobi group; Bacteroidetes; Cytophagia; Cytophagales; Cytophagaceae; Spirosoma
GCF_000980815.1_ASM98081v1	WP_035104762.1	P	K	-	-	-	-	-	Bacteria; Terrabacteria group; Actinobacteria; Actinobacteria; Corynebacteriales; Corynebacteriaceae; Corynebacterium
GCF_000980835.1_ASM98083v1	WP_046439537.1	P	K	-	-	-	-	-	Bacteria; Terrabacteria group; Actinobacteria; Actinobacteria; Corynebacteriales; Corynebacteriaceae; Corynebacterium
GCF_000981765.1_ASM98176v1	WP_046560699.1	P	K	+	+	-	-	-	Bacteria; Proteobacteria; Gammaproteobacteria; Oceanospirillales; Kangiellaceae; Kangiella
GCF_000982715.1_ASM98271v1	WP_006937620.1	P	K	-	-	-	-	-	Bacteria; Terrabacteria group; Actinobacteria; Actinobacteria; Corynebacteriales; Nocardiaceae
GCF_000982825.1_ASM98282v1	WP_004386068.1	P	K	+	+	-	-	-	Bacteria; Proteobacteria; Gammaproteobacteria; Enterobacterales
GCF_000993785.2_ASM99378v2	WP_030727075.1	P	K	-	-	-	-	-	Bacteria; Terrabacteria group; Actinobacteria; Actinobacteria; Streptomycetales; Streptomycetaceae
GCF_001006005.1_ASM100600v1	WP_024484772.1	P	K	+	+	-	-	-	Bacteria; Proteobacteria; Gammaproteobacteria; Enterobacterales; Yersiniaceae
GCF_001007875.1_ASM100787v1	WP_046861154.1	P	K	+	-	-	-	-	Bacteria; Proteobacteria; Gammaproteobacteria; unclassified Gammaproteobacteria; Sedimenticola
GCF_001007995.1_ASM100799v1	WP_046844986.1	M	R	-	-	-	-	-	Bacteria; Terrabacteria group; Deinococcus-Thermus; Deinococci; Deinococcales; Deinococcaceae
GCF_001013905.1_sleC34	WP_029383811.1	P	K	-	-	-	-	-	Bacteria; Terrabacteria group; Actinobacteria; Actinobacteria; Streptomycetales; Streptomycetaceae
GCF_001017655.1_ASM101765v1	WP_052881168.1	P	K	+	-	-	-	-	Bacteria; PVC group; Kiritimatiellaeota; Kiritimatiellae; Kiritimatiellales; Kiritimatiellaceae; Kiritimatiella
GCF_001020955.1_ASM102095v1	WP_026182087.1	P	K	+	-	-	-	-	Bacteria; Proteobacteria; Gammaproteobacteria; Chromatiales; Ectothiorhodospiraceae
GCF_001021025.1_ASM102102v1	WP_047240308.1	P	K	-	-	-	-	-	Bacteria; Terrabacteria group; Actinobacteria; Actinobacteria; Corynebacteriales; Corynebacteriaceae; Corynebacterium
GCF_001021045.1_ASM102104v1	WP_047253168.1	P	K	-	-	-	-	-	Bacteria; Terrabacteria group; Actinobacteria; Actinobacteria; Corynebacteriales; Corynebacteriaceae; Corynebacterium
GCF_001021065.1_ASM102106v1	WP_047259656.1	P	K	-	-	-	-	-	Bacteria; Terrabacteria group; Actinobacteria; Actinobacteria; Corynebacteriales; Corynebacteriaceae; Corynebacterium
GCF_001022195.1_ASM102219v1	WP_004097931.1	P	K	+	+	-	-	-	Bacteria; Proteobacteria; Gammaproteobacteria
GCF_001025155.1_ASM102515v1	WP_003825806.1	P	K	-	-	-	-	-	Bacteria; Terrabacteria group; Actinobacteria; Actinobacteria; Bifidobacteriales; Bifidobacteriaceae; Bifidobacterium
GCF_001025175.1_ASM102517v1	WP_014483972.1	P	K	-	-	-	-	-	Bacteria; Terrabacteria group; Actinobacteria; Actinobacteria; Bifidobacteriales; Bifidobacteriaceae; Bifidobacterium
GCF_001026985.1_ASM102698v1	WP_047782133.1	P	K	+	+	-	-	-	Bacteria; Proteobacteria; Gammaproteobacteria; Enterobacterales; Budviciaceae; Pragia
GCF_001027025.1_ASM102702v1	WP_047753846.1	T	R	+	-	-	-	-	Bacteria; Thermotogae; Thermotogae; Kosmotogales; Kosmotogaceae; Kosmotoga
GCF_001027285.1_ASM102728v1	WP_047859885.1	P	K	-	-	-	+	-	Bacteria; Proteobacteria; delta/epsilon subdivisions; Deltaproteobacteria; Myxococcales; Cystobacterineae; Archangiaceae; Archangium
GCF_001028645.1_ASM102864v1	WP_002433618.1	P	K	-	-	-	-	-	Bacteria; Terrabacteria group; Firmicutes; Bacilli; Bacillales; Staphylococcaceae
GCF_001040945.1_ASM104094v1	WP_013235019.1	S	R	-	-	-	-	-	Bacteria; Proteobacteria; Betaproteobacteria; Burkholderiales; Oxalobacteraceae; Herbaspirillum
GCF_001042405.1_ASM104240v1	WP_054681332.1	P	K	-	-	-	-	-	Bacteria; Terrabacteria group; Firmicutes; Bacilli; Lactobacillales; Lactobacillaceae; Lactobacillus
GCF_001042405.1_ASM104240v1	WP_056970515.1	P	K	-	-	-	-	-	Bacteria; Terrabacteria group; Firmicutes; Bacilli; Lactobacillales; Lactobacillaceae; Lactobacillus
GCF_001042595.1_ASM104259v1	WP_003836842.1	P	K	-	-	-	-	-	Bacteria; Terrabacteria group; Actinobacteria; Actinobacteria; Bifidobacteriales; Bifidobacteriaceae
GCF_001042635.1_ASM104263v1	WP_033518544.1	P	K	-	-	-	-	-	Bacteria; Terrabacteria group; Actinobacteria; Actinobacteria; Bifidobacteriales; Bifidobacteriaceae; Bifidobacterium
GCF_001042675.1_ASM104267v1	WP_006288801.1	P	K	-	-	-	-	-	Bacteria; Terrabacteria group; Actinobacteria; Actinobacteria; Bifidobacteriales; Bifidobacteriaceae; Parascardovia
GCF_001042695.1_ASM104269v1	WP_006292734.1	P	K	-	-	-	-	-	Bacteria; Terrabacteria group; Actinobacteria; Actinobacteria; Bifidobacteriales
GCF_001042715.1_ASM104271v1	WP_044823986.1	P	K	-	-	-	-	-	Bacteria; Terrabacteria group; Firmicutes; Clostridia; Clostridiales; Clostridiaceae; Clostridium
GCF_001043175.1_ASM104317v1	WP_014872049.1	P	K	+	+	-	-	-	Bacteria; Proteobacteria; Gammaproteobacteria; Alteromonadales; Alteromonadaceae
GCF_001050115.1_ASM105011v1	WP_003355307.1	P	K	-	-	-	-	-	Bacteria; Terrabacteria group; Firmicutes; Bacilli; Bacillales; Bacillaceae; Bacillus
GCF_001050435.1_ASM105043v1	WP_048736199.1	P	K	-	-	-	-	-	Bacteria; Terrabacteria group; Firmicutes; Bacilli; Lactobacillales; Lactobacillaceae; Lactobacillus
GCF_001050475.1_ASM105047v1	WP_048703441.1	P	K	-	-	-	-	-	Bacteria; Terrabacteria group; Firmicutes; Bacilli; Lactobacillales; Lactobacillaceae; Lactobacillus
GCF_001051995.2_ASM105199v2	WP_004263495.1	S	R	-	-	+	-	-	Bacteria; Proteobacteria; Betaproteobacteria; Rhodocyclales; Zoogloeaceae
GCF_001077715.1_ASM107771v1	WP_048874805.1	P	K	+	-	-	+	-	Bacteria; Proteobacteria; Gammaproteobacteria; Legionellales; Coxiellaceae; Coxiella
GCF_001078275.1_ASM107827v1	WP_029581264.1	S	R	-	-	+	-	-	Bacteria; Proteobacteria; Betaproteobacteria; Burkholderiales; Alcaligenaceae; Bordetella
GCF_001182745.1_NCTC11134	WP_011210165.1	P	K	-	-	-	-	-	Bacteria; Terrabacteria group; Actinobacteria; Actinobacteria; Corynebacteriales
GCF_001189295.1_ASM118929v1	WP_050435558.1	P	K	+	-	-	+	-	Bacteria; Proteobacteria; delta/epsilon subdivisions; Deltaproteobacteria; Myxococcales; Sorangiineae; Polyangiaceae; Chondromyces
GCF_001189495.1_ASM118949v1	WP_034811624.1	P	K	-	-	-	-	-	Bacteria; Terrabacteria group; Firmicutes; Clostridia; Clostridiales; Clostridiales incertae sedis; Clostridiales Family XIII. Incertae Sedis
GCF_001190945.1_ASM119094v1	WP_052592331.1	P	K	-	-	-	-	-	Bacteria; Terrabacteria group; Actinobacteria; Actinobacteria; Micrococcales; Dermacoccaceae; Luteipulveratus
GCF_001262715.1_ASM126271v1	WP_075048604.1	T	R	-	-	-	-	-	Bacteria; Terrabacteria group; Tenericutes; Mollicutes; Entomoplasmatales; Spiroplasmataceae; Spiroplasma
GCF_001263175.1_ASM126317v1	WP_050724790.1	P	K	+	-	-	+	-	Bacteria; Proteobacteria; delta/epsilon subdivisions; Deltaproteobacteria; Myxococcales; Cystobacterineae; Vulgatibacteraceae; Vulgatibacter
GCF_001263395.1_ASM126339v1	WP_033503736.1	P	K	-	-	-	-	-	Bacteria; Terrabacteria group; Actinobacteria; Actinobacteria; Bifidobacteriales; Bifidobacteriaceae; Bifidobacterium
GCF_001267175.1_ASM126717v1	WP_053100465.1	P	K	+	-	-	-	-	Bacteria; Proteobacteria; Gammaproteobacteria; Pseudomonadales; Pseudomonadaceae; Oblitimonas
GCF_001267925.1_ASM126792v1	WP_053198665.1	S	R	-	-	+	-	-	Bacteria; Proteobacteria; Betaproteobacteria; Burkholderiales; Oxalobacteraceae; Herbaspirillum
GCF_001273775.1_ASM127377v1	WP_053379653.1	P	K	-	-	-	+	-	Bacteria; Nitrospirae; Nitrospira; Nitrospirales; Nitrospiraceae; Nitrospira
GCF_001274895.1_ASM127489v1	WP_053412111.1	P	K	-	-	-	-	-	Bacteria; Terrabacteria group; Actinobacteria; Actinobacteria; Corynebacteriales; Corynebacteriaceae; Corynebacterium
GCF_001275345.1_ASM127534v1	WP_006213279.1	P	K	-	-	-	-	-	Bacteria; Terrabacteria group; Actinobacteria; Actinobacteria
GCF_001277995.1_ASM127799v1	WP_053545020.1	P	K	-	-	-	-	-	Bacteria; Terrabacteria group; Actinobacteria; Actinobacteria; Corynebacteriales; Corynebacteriaceae; Corynebacterium
GCF_001278055.1_ASM127805v1	WP_053551788.1	P	A	+	-	-	-	-	Bacteria; Proteobacteria; delta/epsilon subdivisions; Deltaproteobacteria; Desulfuromonadales; Desulfuromonadaceae; Desulfuromonas
GCF_001278075.1_ASM127807v1	WP_005319856.1	P	K	-	-	-	-	-	Bacteria; Terrabacteria group; Actinobacteria; Actinobacteria; Streptomycetales; Streptomycetaceae; Streptomyces
GCF_001281045.1_ASM128104v1	WP_053945995.1	T	R	-	-	-	-	-	Bacteria; Terrabacteria group; Tenericutes; Mollicutes; Entomoplasmatales; Spiroplasmataceae; Spiroplasma
GCF_001281405.1_ASM128140v1	WP_053943762.1	P	K	-	-	-	-	-	Bacteria; Proteobacteria; Alphaproteobacteria; Rhizobiales; Bartonellaceae; Bartonella
GCF_001294625.1_ASM129462v1	WP_062006705.1	P	K	-	-	-	-	-	Bacteria; Terrabacteria group; Actinobacteria; Actinobacteria; Micrococcales; Micrococcaceae; Arthrobacter
GCF_001298465.1_ASM129846v1	WP_021090997.1	P	K	-	-	-	-	-	Bacteria; Proteobacteria; delta/epsilon subdivisions; Epsilonproteobacteria; Campylobacterales; Campylobacteraceae; Campylobacter
GCF_001298525.1_ASM129852v1	WP_062535255.1	P	K	+	+	-	-	-	Bacteria; Proteobacteria; Gammaproteobacteria; Pseudomonadales; Moraxellaceae; Psychrobacter
GCF_001305575.2_ASM130557v2	WP_062153461.1	P	K	+	-	-	-	-	Bacteria; Proteobacteria; Gammaproteobacteria; Thiotrichales; Thiotrichaceae; Beggiatoa
GCF_001305595.1_ASM130559v1	WP_045580607.1	P	K	+	-	-	-	-	Bacteria; Proteobacteria; Alphaproteobacteria; Rhodospirillales; Rhodospirillaceae; Azospirillum
GCF_001307195.1_ASM130719v1	WP_054581470.1	P	K	+	+	-	-	-	Bacteria; Proteobacteria; Gammaproteobacteria; Pseudomonadales; Moraxellaceae; Acinetobacter
GCF_001307545.1_ASM130754v1	WP_003880756.1	P	K	-	-	-	-	-	Bacteria; Terrabacteria group; Actinobacteria; Actinobacteria; Corynebacteriales
GCF_001308285.1_ASM130828v1	WP_014564152.1	P	K	-	-	-	-	-	Bacteria; Terrabacteria group; Firmicutes; Bacilli; Lactobacillales; Lactobacillaceae; Lactobacillus
GCF_001310085.1_ASM131008v1	WP_062544812.1	P	K	+	-	-	+	-	Bacteria; FCB group; Bacteroidetes/Chlorobi group; Bacteroidetes; Cytophagia; Cytophagales; Hymenobacteraceae; Rufibacter
GCF_001310225.1_ASM131022v1	WP_054724301.1	P	K	-	-	-	+	-	Bacteria; FCB group; Bacteroidetes/Chlorobi group; Bacteroidetes; Flavobacteriia; Flavobacteriales; Flavobacteriaceae; Algibacter
GCF_001314245.2_ASM131424v2	WP_060471572.1	P	K	-	-	-	-	-	Bacteria; Terrabacteria group; Firmicutes; Bacilli; Lactobacillales; Lactobacillaceae; Lactobacillus
GCF_001314325.1_ASM131432v1	WP_054587901.1	P	K	-	-	-	-	-	Bacteria; Proteobacteria; Alphaproteobacteria; Sphingomonadales; Sphingomonadaceae
GCF_001314945.1_ASM131494v1	WP_034531060.1	P	K	-	-	-	-	-	Bacteria; Terrabacteria group; Firmicutes; Bacilli; Lactobacillales; Lactobacillaceae; Lactobacillus
GCF_001314995.1_ASM131499v1	WP_004299761.1	P	K	-	-	-	-	-	Bacteria; FCB group; Bacteroidetes/Chlorobi group; Bacteroidetes; Bacteroidia; Bacteroidales; Bacteroidaceae
GCF_001315015.1_ASM131501v1	WP_014240821.1	P	K	+	+	-	-	-	Bacteria; Proteobacteria; Alphaproteobacteria; Rhodospirillales; Rhodospirillaceae
GCF_001318345.1_ASM131834v1	WP_007210643.1	P	K	-	-	-	-	-	Bacteria; FCB group; Bacteroidetes/Chlorobi group; Bacteroidetes; Bacteroidia; Bacteroidales; Bacteroidaceae
GCF_001399775.1_ASM139977v1	WP_003048293.1	L	R	-	-	-	+	-	Bacteria; Terrabacteria group; Deinococcus-Thermus; Deinococci; Thermales; Thermaceae; Thermus
GCF_001402875.1_ASM140287v1	WP_055038289.1	P	K	+	-	-	-	-	Bacteria; Proteobacteria; Alphaproteobacteria; Rhizobiales; Hyphomicrobiaceae; Blastochloris
GCF_001411495.1_ASM141149v1	WP_011351421.1	S	R	-	-	+	-	-	Bacteria; Proteobacteria; Betaproteobacteria; Burkholderiales; Burkholderiaceae
GCF_001414055.1_ASM141405v1	WP_062143921.1	P	K	+	-	-	+	-	Bacteria; Proteobacteria; Alphaproteobacteria; Caulobacterales; Caulobacteraceae; Caulobacter
GCF_001420915.1_ASM142091v1	WP_055734002.1	P	K	+	+	-	-	-	Bacteria; Proteobacteria; Gammaproteobacteria; Alteromonadales; Alteromonadaceae; Agarivorans
GCF_001421015.2_ASM142101v2	WP_060535637.1	P	K	-	-	-	-	-	Bacteria; Terrabacteria group; Firmicutes; Bacilli; Bacillales; Paenibacillaceae; Paenibacillus
GCF_001431725.1_ASM143172v1	WP_021820290.1	P	K	+	+	-	-	-	Bacteria; Proteobacteria; Gammaproteobacteria; Oceanospirillales; Halomonadaceae; Halomonas
GCF_001441165.1_ASM144116v1	WP_015070480.1	P	K	-	-	-	-	-	Bacteria; Terrabacteria group; Actinobacteria; Actinobacteria; Propionibacteriales; Propionibacteriaceae; Acidipropionibacterium
GCF_001442535.1_ASM144253v1	WP_031370552.1	P	K	+	-	-	-	-	Bacteria; Proteobacteria; Gammaproteobacteria; Xanthomonadales; Xanthomonadaceae; Lysobacter
GCF_001443605.1_ASM144360v1	WP_057952859.1	P	K	-	-	-	-	-	Bacteria; FCB group; Bacteroidetes/Chlorobi group; Bacteroidetes; Bacteroidia; Marinilabiliales; Salinivirgaceae; Salinivirga
GCF_001443625.1_ASM144362v1	WP_055644572.1	P	K	+	-	-	-	-	Bacteria; Terrabacteria group; Actinobacteria; Actinobacteria; Streptomycetales; Streptomycetaceae; Streptomyces
GCF_001444405.1_ASM144440v1	WP_058028675.1	P	K	+	+	-	-	-	Bacteria; Proteobacteria; Gammaproteobacteria; Alteromonadales; Pseudoalteromonadaceae; Pseudoalteromonas
GCF_001444425.1_ASM144442v1	WP_058020585.1	P	K	+	-	+	-	-	Bacteria; Proteobacteria; Gammaproteobacteria; unclassified Gammaproteobacteria; Pseudohongiella
GCF_001444425.1_ASM144442v1	WP_058021975.1	A	R	+	-	+	-	-	Bacteria; Proteobacteria; Gammaproteobacteria; unclassified Gammaproteobacteria; Pseudohongiella
GCF_001444445.1_ASM144444v1	WP_025065501.1	P	K	-	-	-	-	-	Bacteria; FCB group; Bacteroidetes/Chlorobi group; Bacteroidetes; Bacteroidia; Bacteroidales; Prevotellaceae; Prevotella
GCF_001445575.1_ASM144557v1	WP_062288437.1	P	K	-	-	-	-	-	Bacteria; Terrabacteria group; Actinobacteria; Actinobacteria; Micrococcales; Micrococcaceae; Arthrobacter
GCF_001447335.1_ASM144733v1	WP_050667686.1	S	R	-	-	+	-	-	Bacteria; Proteobacteria; Gammaproteobacteria; Aeromonadales; Aeromonadaceae; Aeromonas
GCF_001454945.1_ASM145494v1	WP_033117851.1	P	K	-	-	-	-	-	Bacteria; Terrabacteria group; Firmicutes; Clostridia; Clostridiales; unclassified Clostridiales; Intestinimonas
GCF_001455205.1_ASM145520v1	WP_062557567.1	S	R	-	-	+	-	-	Bacteria; Proteobacteria; Betaproteobacteria; Nitrosomonadales; Nitrosomonadaceae; Nitrosomonas
GCF_001457455.1_NCTC11397	WP_003851660.1	P	K	-	-	-	-	-	Bacteria; Terrabacteria group; Actinobacteria; Actinobacteria; Corynebacteriales; Corynebacteriaceae; Corynebacterium
GCF_001457475.1_NCTC10807	WP_006220534.1	S	R	-	-	+	-	-	Bacteria; Proteobacteria; Betaproteobacteria; Burkholderiales; Alcaligenaceae
GCF_001460635.1_htyphlonius_mit97-6810	WP_034327277.1	P	K	-	-	-	-	-	Bacteria; Proteobacteria; delta/epsilon subdivisions; Epsilonproteobacteria; Campylobacterales; Helicobacteraceae
GCF_001465255.1_ASM146525v1	WP_054818830.1	P	K	-	-	-	-	-	Bacteria; Terrabacteria group; Firmicutes; Bacilli; Bacillales; Paenibacillaceae; Paenibacillus
GCF_001465295.1_ASM146529v1	WP_011327184.1	P	K	+	+	-	-	-	Bacteria; Proteobacteria; Gammaproteobacteria; Alteromonadales; Pseudoalteromonadaceae
GCF_001465835.2_ASM146583v2	WP_058385505.1	P	K	-	-	-	-	-	Bacteria; Terrabacteria group; Firmicutes; Bacilli; Bacillales; Planococcaceae
GCF_001466725.1_ASM146672v1	WP_062482989.1	P	K	+	+	-	-	-	Bacteria; Proteobacteria; Gammaproteobacteria; Alteromonadales; Alteromonadaceae; Lacimicrobium
GCF_001482385.1_ASM148238v1	WP_010383714.1	P	K	+	+	-	-	-	Bacteria; Proteobacteria; Gammaproteobacteria; Alteromonadales; Pseudoalteromonadaceae; Pseudoalteromonas
GCF_001483385.1_ASM148338v1	WP_058884844.1	P	K	-	-	-	-	-	Bacteria; FCB group; Bacteroidetes/Chlorobi group; Bacteroidetes; Flavobacteriia; Flavobacteriales; Flavobacteriaceae; Tenacibaculum
GCF_001484605.1_ASM148460v1	WP_056340266.1	P	K	-	-	-	-	-	Bacteria; Terrabacteria group; Actinobacteria; Actinobacteria; Micrococcales
GCF_001484935.1_ASM148493v1	WP_004693574.1	P	K	+	+	-	-	-	Bacteria; Proteobacteria; Gammaproteobacteria; Pseudomonadales; Moraxellaceae
GCF_001499615.1_Acetobacter_senegalensis_108B	WP_006557949.1	P	K	+	-	-	-	-	Bacteria; Proteobacteria; Alphaproteobacteria; Rhodospirillales; Acetobacteraceae
GCF_001499655.1_PNK1	WP_032123814.1	P	K	+	+	-	+	-	Bacteria; PVC group; Chlamydiae; Chlamydiia; Parachlamydiales; Parachlamydiaceae
GCF_001542625.1_ASM154262v2	WP_067312407.1	P	K	-	-	-	-	-	Bacteria; Terrabacteria group; Actinobacteria; Actinobacteria; Streptomycetales; Streptomycetaceae; Streptomyces
GCF_001543105.1_ASM154310v1	WP_060776140.1	P	K	-	-	-	-	-	Bacteria; Terrabacteria group; Firmicutes; Bacilli; Lactobacillales; Aerococcaceae; Aerococcus
GCF_001543145.1_ASM154314v1	WP_067975967.1	P	K	-	-	-	-	-	Bacteria; Terrabacteria group; Firmicutes; Bacilli; Lactobacillales; Aerococcaceae
GCF_001543245.1_ASM154324v1	WP_067977815.1	P	K	-	-	-	-	-	Bacteria; Terrabacteria group; Firmicutes; Bacilli; Lactobacillales; Aerococcaceae; Aerococcus
GCF_001543325.1_ASM154332v1	WP_068205759.1	P	K	-	-	-	-	-	Bacteria; FCB group; Bacteroidetes/Chlorobi group; Bacteroidetes; Flavobacteriia; Flavobacteriales; Flavobacteriaceae; Lutibacter
GCF_001544015.1_ASM154401v1	WP_068138793.1	P	K	-	-	-	-	-	Bacteria; Terrabacteria group; Firmicutes; Limnochordia; Limnochordales; Limnochordaceae; Limnochorda
GCF_001545155.1_ASM154515v1	WP_066445412.1	P	K	+	+	-	-	-	Bacteria; Proteobacteria; Gammaproteobacteria; Oceanospirillales; Halomonadaceae
GCF_001547735.1_ASM154773v1	WP_068550617.1	P	K	+	-	-	-	-	Bacteria; Aquificae; Aquificae; Aquificales; Aquificales genera incertae sedis; Thermosulfidibacter
GCF_001547755.1_ASM154775v1	WP_066042925.1	P	K	+	-	-	-	-	Bacteria; Proteobacteria; Gammaproteobacteria; unclassified Gammaproteobacteria; sulfur-oxidizing symbionts
GCF_001547935.1_ASM154793v1	WP_068715431.1	P	K	+	+	-	-	-	Bacteria; Proteobacteria; Gammaproteobacteria; Vibrionales; Vibrionaceae; Vibrio
GCF_001547975.1_ASM154797v1	WP_004414887.1	Q	R	-	-	-	-	-	Bacteria; Terrabacteria group; Tenericutes; Mollicutes; Mycoplasmatales; Mycoplasmataceae; Mycoplasma
GCF_001547995.1_ASM154799v1	WP_023979275.1	P	K	+	-	-	-	-	Bacteria; Proteobacteria; Alphaproteobacteria; Rhodospirillales; Acetobacteraceae
GCF_001548015.1_ASM154801v1	WP_060848905.1	P	K	+	-	-	-	-	Bacteria; Proteobacteria; Alphaproteobacteria; Rhizobiales; Methylobacteriaceae
GCF_001548055.1_ASM154805v1	WP_060826448.1	P	K	-	-	-	-	-	Bacteria; Proteobacteria; delta/epsilon subdivisions; Epsilonproteobacteria; Campylobacterales; Campylobacteraceae; Sulfurospirillum
GCF_001548275.1_ASM154827v1	WP_068516673.1	V	Q	-	-	-	-	-	Bacteria; Thermodesulfobacteria; Thermodesulfobacteria; Thermodesulfobacteriales; Thermodesulfobacteriaceae; Caldimicrobium
GCF_001553195.1_ASM155319v1	WP_004794434.1	Q	R	-	-	-	-	-	Bacteria; Terrabacteria group; Tenericutes; Mollicutes; Mycoplasmatales; Mycoplasmataceae; Mycoplasma
GCF_001553565.1_ASM155356v1	WP_067943050.1	P	K	-	-	-	-	-	Bacteria; Terrabacteria group; Actinobacteria; Actinobacteria; Actinomycetales; Actinomycetaceae; Actinomyces
GCF_001553625.1_ASM155362v1	WP_066605463.1	P	K	-	-	-	-	-	Bacteria; Proteobacteria; delta/epsilon subdivisions; Deltaproteobacteria; Desulfovibrionales; Desulfomicrobiaceae; Desulfomicrobium
GCF_001553935.1_ASM155393v1	WP_010615272.1	P	K	-	-	-	-	-	Bacteria; Terrabacteria group; Actinobacteria; Actinobacteria; Actinomycetales; Actinomycetaceae; Actinomyces
GCF_001558415.2_ASM155841v2	WP_020329416.1	P	K	+	+	-	-	-	Bacteria; Proteobacteria; Gammaproteobacteria; Vibrionales; Vibrionaceae; Vibrio
GCF_001559115.2_ASM155911v2	WP_002481025.1	P	K	-	-	-	-	-	Bacteria; Terrabacteria group; Firmicutes; Bacilli; Bacillales; Staphylococcaceae
GCF_001561955.1_ASM156195v1	WP_066046920.1	P	K	-	-	-	-	-	Bacteria; Terrabacteria group; Firmicutes; Clostridia; Clostridiales; Lachnospiraceae; Anaerotignum
GCF_001562115.1_ASM156211v1	WP_013785484.1	P	K	+	+	-	-	-	Bacteria; Proteobacteria; Gammaproteobacteria; Alteromonadales; Alteromonadaceae
GCF_001564455.1_ASM156445v1	WP_067556728.1	T	R	-	-	-	-	-	Bacteria; Terrabacteria group; Firmicutes; Erysipelotrichia; Erysipelotrichales; Erysipelotrichaceae; Faecalibaculum
GCF_001572725.1_ASM157272v1	WP_015344275.1	P	K	+	+	-	-	-	Bacteria; Proteobacteria; Gammaproteobacteria; Enterobacterales; Yersiniaceae
GCF_001583415.1_ASM158341v1	WP_003889969.1	P	K	-	-	-	-	-	Bacteria; Terrabacteria group; Actinobacteria; Actinobacteria; Corynebacteriales
GCF_001584185.1_ASM158418v1	WP_061939317.1	S	R	-	-	+	-	-	Bacteria; Proteobacteria; Betaproteobacteria; Burkholderiales; Oxalobacteraceae; Collimonas
GCF_001586165.1_ASM158616v1	WP_025798719.1	P	K	+	+	-	-	-	Bacteria; Proteobacteria; Gammaproteobacteria; Enterobacterales
GCF_001586195.1_ASM158619v1	WP_008404273.1	P	K	-	-	-	-	-	Bacteria; Terrabacteria group; Firmicutes; Bacilli; Bacillales; Planococcaceae
GCF_001586215.1_ASM158621v1	WP_062038886.1	P	K	-	-	-	-	-	Bacteria; Terrabacteria group; Actinobacteria; Actinobacteria; Corynebacteriales; Corynebacteriaceae
GCF_001586255.1_ASM158625v1	WP_008249289.1	S	R	+	+	+	-	-	Bacteria; Proteobacteria; Gammaproteobacteria; Cellvibrionales; Spongiibacteraceae; Zhongshania
GCF_001586255.1_ASM158625v1	WP_008250558.1	P	K	+	+	+	-	-	Bacteria; Proteobacteria; Gammaproteobacteria; Cellvibrionales; Spongiibacteraceae; Zhongshania
GCF_001594265.1_ASM159426v1	WP_005544066.1	P	K	-	-	-	-	-	Bacteria; Proteobacteria; Gammaproteobacteria; Pasteurellales
GCF_001598035.1_ASM159803v1	WP_062711755.1	P	K	-	-	-	-	-	Bacteria; Terrabacteria group; Firmicutes; Bacilli; Lactobacillales; Streptococcaceae; Streptococcus
GCF_001605015.1_ASM160501v1	WP_018429990.1	P	K	-	-	-	-	-	Bacteria; Proteobacteria; Alphaproteobacteria; Rhizobiales
GCF_001606005.1_ASM160600v1	WP_025777834.1	P	K	-	-	-	-	-	Bacteria; Terrabacteria group; Actinobacteria; Actinobacteria; Micrococcales; Brevibacteriaceae
GCF_001606025.1_ASM160602v1	WP_062845283.1	P	K	+	+	-	-	-
GCF_001611135.1_ASM161113v1	WP_046872055.1	P	K	-	-	-	-	-	Bacteria; Terrabacteria group; Firmicutes; Bacilli; Lactobacillales; Lactobacillaceae; Pediococcus
GCF_001611975.1_ASM161197v1	WP_066135243.1	P	K	+	-	-	-	-	Bacteria; Proteobacteria; Alphaproteobacteria; Rhodospirillales; Rhodospirillaceae; Haematospirillum
GCF_001617625.1_ASM161762v1	WP_067150562.1	P	K	+	+	-	-	-	Bacteria; Proteobacteria; Gammaproteobacteria; Cellvibrionales; Microbulbiferaceae; Microbulbifer
GCF_001620265.1_ASM162026v1	WP_066811531.1	P	K	+	-	-	-	-	Bacteria; Proteobacteria; Alphaproteobacteria; Rhodobacterales; Rhodobacteraceae; Defluviimonas
GCF_001620265.1_ASM162026v1	WP_066815302.1	P	K	+	-	-	-	-	Bacteria; Proteobacteria; Alphaproteobacteria; Rhodobacterales; Rhodobacteraceae; Defluviimonas
GCF_001620305.1_ASM162030v1	WP_032382087.1	P	K	-	-	-	-	-	Bacteria; Terrabacteria group; Actinobacteria; Actinobacteria; Corynebacteriales; Nocardiaceae; Rhodococcus
GCF_001623565.1_ASM162356v1	WP_067086631.1	P	K	-	-	-	-	-	Bacteria; Terrabacteria group; Firmicutes; Bacilli; Lactobacillales; Streptococcaceae; Streptococcus
GCF_001632805.1_ASM163280v1	WP_030093559.1	P	K	-	-	-	-	-	Bacteria; Terrabacteria group; Actinobacteria; Actinobacteria; Corynebacteriales
GCF_001633165.1_ASM163316v1	WP_042462320.1	P	K	+	-	-	-	-	Bacteria; Proteobacteria; Alphaproteobacteria; Rhodobacterales; Rhodobacteraceae; Rhodovulum
GCF_001633165.1_ASM163316v1	WP_081251744.1	P	K	+	-	-	-	-	Bacteria; Proteobacteria; Alphaproteobacteria; Rhodobacterales; Rhodobacteraceae; Rhodovulum
GCF_001636295.1_ASM163629v1	WP_068201132.1	P	K	-	-	-	-	-	Bacteria; Terrabacteria group; Actinobacteria; Actinobacteria; Micrococcales; Promicromonosporaceae; Isoptericola
GCF_001641285.1_ASM164128v1	WP_017462799.1	P	K	+	-	-	-	-	Bacteria; Proteobacteria; Gammaproteobacteria; Xanthomonadales; Rhodanobacteraceae
GCF_001643015.1_ASM164301v1	WP_066565883.1	P	K	-	-	-	-	-	Bacteria; Terrabacteria group; Actinobacteria; Actinobacteria; Corynebacteriales; Corynebacteriaceae; Corynebacterium
GCF_001643955.1_ASM164395v1	WP_034963843.1	P	K	-	-	-	-	-	Bacteria; Proteobacteria; delta/epsilon subdivisions; Epsilonproteobacteria; Campylobacterales; Campylobacteraceae
GCF_001643975.1_ASM164397v1	WP_034963843.1	P	K	-	-	-	-	-	Bacteria; Proteobacteria; delta/epsilon subdivisions; Epsilonproteobacteria; Campylobacterales; Campylobacteraceae
GCF_001644705.1_ASM164470v1	WP_022635072.1	P	K	+	+	-	-	-	Bacteria; Proteobacteria; Gammaproteobacteria; Enterobacterales; Pectobacteriaceae; Dickeya
GCF_001647635.1_ASM164763v1	WP_064109199.1	P	K	-	-	-	-	-	Bacteria; Terrabacteria group; Actinobacteria; Actinobacteria; Micrococcales; Microbacteriaceae; Leifsonia
GCF_001648175.1_ASM164817v1	WP_027351121.1	P	K	+	+	-	-	-	Bacteria; Proteobacteria; Gammaproteobacteria; Oceanospirillales; Halomonadaceae; Halotalea
GCF_001652485.1_ASM165248v1	WP_007876600.1	P	K	-	-	-	-	-	Bacteria; Proteobacteria; Alphaproteobacteria; Rhizobiales; Brucellaceae
GCF_001653335.1_ASM165333v1	WP_068111283.1	P	K	-	-	-	-	-	Bacteria; Terrabacteria group; Actinobacteria; Actinobacteria; Propionibacteriales; Nocardioidaceae; Nocardioides
GCF_001653755.1_ASM165375v1	WP_035324892.1	P	K	-	-	-	+	-	Bacteria; FCB group; Bacteroidetes/Chlorobi group; Bacteroidetes; Flavobacteriia; Flavobacteriales; Flavobacteriaceae; Dokdonia
GCF_001654435.1_ASM165443v1	WP_009623501.1	S	R	-	-	+	-	-	Bacteria; Proteobacteria; Gammaproteobacteria; Pseudomonadales; Pseudomonadaceae
GCF_001659785.1_ASM165978v1	WP_067471024.1	P	K	-	-	-	-	-	Bacteria; Terrabacteria group; Actinobacteria; Actinobacteria; Corynebacteriales; Dietziaceae; Dietzia
GCF_001660005.1_ASM166000v1	WP_012421987.1	M	R	-	-	-	-	-	Bacteria; Spirochaetes; Spirochaetia; Spirochaetales; Borreliaceae; Borrelia
GCF_001660485.1_ASM166048v1	WP_067876070.1	P	K	-	-	-	-	-	Bacteria; Terrabacteria group; Actinobacteria; Actinobacteria; Micrococcales; Microbacteriaceae; Agromyces
GCF_001663675.1_ASM166367v1	WP_068279903.1	P	K	-	-	-	-	-	Bacteria; Terrabacteria group; Firmicutes; Bacilli; Lactobacillales; Lactobacillaceae; Lactobacillus
GCF_001676785.2_ASM167678v2	WP_012671711.1	A	Q	-	-	-	-	-	Bacteria; Spirochaetes; Spirochaetia; Brachyspirales; Brachyspiraceae; Brachyspira
GCF_001677275.1_ASM167727v1	WP_017027343.1	P	K	+	+	-	-	-	Bacteria; Proteobacteria; Gammaproteobacteria; Vibrionales; Vibrionaceae
GCF_001678905.1_ASM167890v1	WP_065248752.1	P	K	-	-	-	-	-	Bacteria; Terrabacteria group; Actinobacteria; Actinobacteria; Micrococcales; Dermabacteraceae
GCF_001679725.1_ASM167972v1	WP_066595661.1	P	K	-	-	-	-	-	Bacteria; Terrabacteria group; Actinobacteria; Actinobacteria; Micrococcales; Microbacteriaceae
GCF_001685355.1_ASM168535v1	WP_067428926.1	P	K	-	-	-	-	-	Bacteria; Terrabacteria group; Actinobacteria; Actinobacteria; Streptomycetales; Streptomycetaceae; Streptomyces
GCF_001685395.1_ASM168539v1	WP_068696104.1	P	K	-	-	-	-	-	Bacteria; Terrabacteria group; Firmicutes; Bacilli; Bacillales; Paenibacillaceae; Paenibacillus
GCF_001685435.2_ASM168543v3	WP_008588907.1	P	K	-	-	-	-	-	Bacteria; Terrabacteria group; Firmicutes; Bacilli; Bacillales; Bacillaceae
GCF_001685465.1_ASM168546v1	WP_005599299.1	P	K	+	+	-	-	-	Bacteria; Proteobacteria; Gammaproteobacteria; Vibrionales; Vibrionaceae; Vibrio
GCF_001687565.2_ASM168756v2	WP_006830445.1	P	K	-	-	-	-	-	Bacteria; Terrabacteria group; Firmicutes; Bacilli; Bacillales; Planococcaceae; Planococcus
GCF_001688625.2_ASM168862v2	WP_009259219.1	P	K	-	-	-	-	-	Bacteria; Terrabacteria group; Firmicutes; Clostridia; Clostridiales; Ruminococcaceae; Flavonifractor
GCF_001693385.1_ASM169338v1	WP_057863529.1	P	K	-	-	-	-	-	Bacteria; Proteobacteria; Alphaproteobacteria; Rhizobiales; Bradyrhizobiaceae
GCF_001693675.1_ASM169367v1	WP_003956403.1	P	K	-	-	-	-	-	Bacteria; Terrabacteria group; Actinobacteria; Actinobacteria; Streptomycetales; Streptomycetaceae; Streptomyces
GCF_001697185.1_ASM169718v1	WP_068824800.1	P	K	-	-	-	-	-	Bacteria; FCB group; Bacteroidetes/Chlorobi group; Bacteroidetes; Flavobacteriia; Flavobacteriales; Flavobacteriaceae; Wenyingzhuangia
GCF_001697225.1_ASM169722v1	WP_068806010.1	P	K	+	-	-	-	-	Bacteria; Proteobacteria; Gammaproteobacteria; Immundisolibacterales; Immundisolibacteraceae; Immundisolibacter
GCF_001698145.1_ASM169814v1	WP_010000108.1	P	K	-	-	-	-	-	Bacteria; Terrabacteria group; Firmicutes; Bacilli; Lactobacillales; Leuconostocaceae
GCF_001700895.1_ASM170089v1	WP_075433095.1	P	K	+	-	-	-	-	Bacteria; Proteobacteria; Gammaproteobacteria; Enterobacterales; Erwiniaceae; Buchnera
GCF_001701025.1_ASM170102v1	WP_065920525.1	P	K	-	-	-	-	-	Bacteria; Terrabacteria group; Actinobacteria; Actinobacteria; Pseudonocardiales; Pseudonocardiaceae; Lentzea
GCF_001701045.1_ASM170104v1	WP_066745371.1	M	R	-	-	-	-	-	Bacteria; Synergistetes; Synergistia; Synergistales; Synergistaceae; Cloacibacillus
GCF_001702175.1_ASM170217v1	WP_054707023.1	P	K	-	-	-	-	-	Bacteria; Terrabacteria group; Firmicutes; Bacilli; Lactobacillales; Lactobacillaceae; Lactobacillus
GCF_001704115.1_ASM170411v1	WP_067556395.1	P	K	+	+	-	-	-	Bacteria; Proteobacteria; Gammaproteobacteria; Pseudomonadales; Moraxellaceae; Acinetobacter
GCF_001704155.1_ASM170415v1	WP_068853252.1	P	K	+	-	-	-	-	Bacteria; Proteobacteria; Gammaproteobacteria; Xanthomonadales; Xanthomonadaceae; Stenotrophomonas
GCF_001704275.1_ASM170427v1	WP_067353856.1	P	K	-	-	-	-	-	Bacteria; Terrabacteria group; Actinobacteria; Actinobacteria; Streptomycetales; Streptomycetaceae; Streptomyces
GCF_001704615.2_ASM170461v2	WP_065991924.1	P	K	+	+	-	-	-	Bacteria; Proteobacteria; Gammaproteobacteria; Pseudomonadales; Moraxellaceae; Acinetobacter
GCF_001705565.1_ASM170556v1	WP_002802373.1	P	K	+	-	-	-	-	Bacteria; Proteobacteria; Gammaproteobacteria; Xanthomonadales; Xanthomonadaceae
GCF_001708405.1_ASM170840v1	WP_068989421.1	P	K	+	+	-	-	-	Bacteria; Proteobacteria; Gammaproteobacteria; Oceanospirillales; Kangiellaceae; Kangiella
GCF_001709315.1_ASM170931v1	WP_008925396.1	P	K	+	+	-	-	-	Bacteria; Proteobacteria; Gammaproteobacteria; Enterobacterales; Erwiniaceae
GCF_001715535.1_ASM171553v1	WP_069116069.1	S	R	-	-	-	-	-	Bacteria; Terrabacteria group; Tenericutes; Mollicutes; Entomoplasmatales; Spiroplasmataceae; Spiroplasma
GCF_001717955.1_ASM171795v1	WP_069206703.1	P	K	-	-	-	+	-	Bacteria; Proteobacteria; Alphaproteobacteria; Sphingomonadales; Sphingomonadaceae; Sphingomonas
GCF_001720485.1_ASM172048v1	WP_077374233.1	P	K	+	+	-	-	-	Bacteria; Proteobacteria; Gammaproteobacteria; Oceanospirillales; Halomonadaceae
GCF_001721685.1_ASM172168v1	WP_069364726.1	P	K	-	-	-	-	-	Bacteria; Terrabacteria group; Firmicutes; Bacilli; Bacillales; Bacillaceae; Bacillus
GCF_001729485.1_ASM172948v1	WP_069568855.1	P	K	+	-	-	-	-	Bacteria; Terrabacteria group; Actinobacteria; Actinobacteria; Streptomycetales; Streptomycetaceae; Streptomyces
GCF_001729725.1_ASM172972v1	WP_003855940.1	P	K	+	+	-	-	-	Bacteria; Proteobacteria; Gammaproteobacteria; Enterobacterales
GCF_001735805.1_ASM173580v1	WP_069781973.1	P	K	+	-	-	-	-	Bacteria; Terrabacteria group; Actinobacteria; Actinobacteria; Streptomycetales; Streptomycetaceae; Streptomyces
GCF_001742225.1_ASM174222v1	WP_008828401.1	P	K	-	-	-	-	-	Bacteria; Proteobacteria; Alphaproteobacteria; Sphingomonadales
GCF_001746835.1_ASM174683v1	WP_069963487.1	P	N	-	-	-	+	-	Bacteria; PVC group; Verrucomicrobia; Opitutae; Opitutales; Opitutaceae; Lacunisphaera
GCF_001750165.1_ASM175016v1	WP_039608093.1	P	K	+	+	-	-	-	Bacteria; Proteobacteria; Gammaproteobacteria; Alteromonadales; Pseudoalteromonadaceae; Pseudoalteromonas
GCF_001753205.1_ASM175320v1	WP_075527969.1	P	K	-	-	-	-	-	Bacteria; Terrabacteria group; Firmicutes; Bacilli; Bacillales; Bacillaceae; Lysinibacillus
GCF_001753245.1_ASM175324v1	WP_070077991.1	P	K	+	-	-	-	-	Bacteria; Proteobacteria; Gammaproteobacteria; Chromatiales; Ectothiorhodospiraceae; Acidihalobacter
GCF_001761345.1_ASM176134v1	WP_017979186.1	P	K	-	-	-	+	-	Bacteria; Proteobacteria; Alphaproteobacteria; Sphingomonadales; Sphingomonadaceae
GCF_001761365.1_ASM176136v1	WP_065318417.1	P	K	-	-	-	+	-	Bacteria; FCB group; Bacteroidetes/Chlorobi group; Bacteroidetes; Flavobacteriia; Flavobacteriales; Flavobacteriaceae; Polaribacter
GCF_001761465.1_ASM176146v1	WP_035638768.1	P	K	-	-	-	+	-	Bacteria; FCB group; Bacteroidetes/Chlorobi group; Bacteroidetes; Flavobacteriia; Flavobacteriales; Flavobacteriaceae; Flavobacterium
GCF_001766235.1_ASM176623v1	WP_070323351.1	P	K	+	-	-	-	-	Bacteria; Proteobacteria; Alphaproteobacteria; Rhodospirillales; Acetobacteraceae; Acetobacter
GCF_001767235.1_ASM176723v1	WP_070394125.1	P	K	-	-	-	+	-	Bacteria; Terrabacteria group; Cyanobacteria/Melainabacteria group; Cyanobacteria; Oscillatoriophycideae; Oscillatoriales; Oscillatoriaceae; Moorea
GCF_001767275.1_ASM176727v1	WP_002832037.1	P	K	-	-	-	-	-	Bacteria; Terrabacteria group; Firmicutes; Bacilli; Lactobacillales; Lactobacillaceae; Pediococcus; Pediococcus acidilactici group
GCF_001787335.1_ASM178733v1	WP_029605992.1	P	K	+	-	-	-	-	Bacteria; Proteobacteria; Alphaproteobacteria; Rhodospirillales; Acetobacteraceae; Kozakia
GCF_001831475.1_ASM183147v1	WP_066331667.1	P	K	-	-	-	+	-	Bacteria; FCB group; Bacteroidetes/Chlorobi group; Bacteroidetes; Flavobacteriia; Flavobacteriales; Flavobacteriaceae; Flavobacterium
GCF_001831495.1_ASM183149v1	WP_068546976.1	P	K	+	+	-	-	-	Bacteria; Proteobacteria; Gammaproteobacteria; Alteromonadales; Colwelliaceae; Thalassotalea
GCF_001854125.1_ASM185412v1	WP_070965258.1	P	K	+	+	-	-	-	Bacteria; Proteobacteria; Gammaproteobacteria; Alteromonadales; Alteromonadaceae; Marinobacter
GCF_001854185.1_ASM185418v1	WP_070969765.1	P	K	-	-	-	-	-	Bacteria; Terrabacteria group; Firmicutes; Clostridia; Clostridiales; Clostridiaceae; Clostridium
GCF_001854245.1_ASM185424v1	WP_020875049.1	P	K	+	-	-	-	-	Bacteria; Proteobacteria; delta/epsilon subdivisions; Deltaproteobacteria; Desulfobacterales; Desulfobacteraceae; Desulfococcus
GCF_001865575.1_ASM186557v1	WP_027198331.1	S	R	-	-	+	-	-	Bacteria; Proteobacteria; Betaproteobacteria; Burkholderiales; Burkholderiaceae; Paraburkholderia
GCF_001865855.1_ASM186585v1	WP_033086911.1	P	K	-	-	-	-	-	Bacteria; Terrabacteria group; Actinobacteria; Actinobacteria; Corynebacteriales; Nocardiaceae; Nocardia
GCF_001870205.1_ASM187020v1	WP_071456965.1	P	K	-	-	-	-	-	Bacteria; Terrabacteria group; Firmicutes; Bacilli; Lactobacillales; Enterococcaceae
GCF_001880325.1_ASM188032v1	WP_071676289.1	I	R	-	-	-	+	-	Bacteria; Terrabacteria group; Deinococcus-Thermus; Deinococci; Thermales; Thermaceae; Thermus
GCF_001886615.1_ASM188661v1	WP_071942041.1	P	K	+	+	-	-	-	Bacteria; Proteobacteria; Gammaproteobacteria; Oceanospirillales; Halomonadaceae; Halomonas
GCF_001886715.1_ASM188671v1	WP_071928926.1	P	K	-	-	-	-	-	Bacteria; Terrabacteria group; Actinobacteria; Actinobacteria; Corynebacteriales; Nocardiaceae; Nocardia
GCF_001886815.1_ASM188681v1	WP_006926625.1	P	K	-	-	-	-	-	Bacteria; Calditrichaeota; Calditrichae; Calditrichales; Calditrichaceae; Caldithrix
GCF_001886855.1_ASM188685v1	WP_071937215.1	S	R	-	-	-	-	-	Bacteria; Terrabacteria group; Tenericutes; Mollicutes; Entomoplasmatales; Spiroplasmataceae; Spiroplasma
GCF_001887245.1_ASM188724v1	WP_071893532.1	P	K	-	-	-	-	-	Bacteria; Terrabacteria group; Actinobacteria; Actinobacteria; Micrococcales; Micrococcaceae; Neomicrococcus
GCF_001888165.1_ASM188816v1	WP_072286953.1	P	K	+	-	-	-	-	Bacteria; Proteobacteria; delta/epsilon subdivisions; Deltaproteobacteria; Desulfuromonadales; Desulfuromonadaceae; Pelobacter
GCF_001889165.1_ASM188916v1	WP_072579230.1	P	K	-	-	-	-	-	Bacteria; Terrabacteria group; Firmicutes; Bacilli; Bacillales; Bacillaceae; Bacillus
GCF_001908775.1_ASM190877v1	WP_006450332.1	P	K	+	-	-	-	-	Bacteria; Proteobacteria; Gammaproteobacteria; Xanthomonadales; Xanthomonadaceae
GCF_001922025.1_ASM192202v1	WP_057909074.1	P	K	-	-	-	-	-	Bacteria; Terrabacteria group; Firmicutes; Bacilli; Lactobacillales; Lactobacillaceae; Lactobacillus
GCF_001922305.1_ASM192230v1	WP_075146635.1	S	R	-	-	+	-	-	Bacteria; Proteobacteria; Betaproteobacteria; Rhodocyclales; Zoogloeaceae; Thauera
GCF_001922385.1_ASM192238v1	WP_075151636.1	P	K	-	-	-	-	-	Bacteria; Proteobacteria; Alphaproteobacteria; Sphingomonadales; Sphingomonadaceae; Sphingomonas
GCF_001922545.1_ASM192254v1	WP_029346671.1	T	R	-	-	-	-	-	Bacteria; Spirochaetes; Spirochaetia; Spirochaetales; Borreliaceae; Borreliella
GCF_001936235.1_ASM193623v1	WP_006584925.1	P	K	-	-	-	-	-	Bacteria; Terrabacteria group; Firmicutes; Bacilli; Lactobacillales; Lactobacillaceae; Lactobacillus
GCF_001936235.1_ASM193623v1	WP_006588204.1	P	K	-	-	-	-	-	Bacteria; Terrabacteria group; Firmicutes; Bacilli; Lactobacillales; Lactobacillaceae; Lactobacillus
GCF_001936255.1_ASM193625v1	WP_025419427.1	M	R	-	-	-	-	-	Bacteria; Spirochaetes; Spirochaetia; Spirochaetales; Borreliaceae; Borrelia
GCF_001936335.1_ASM193633v1	WP_054744855.1	P	K	-	-	-	-	-	Bacteria; Terrabacteria group; Firmicutes; Bacilli; Lactobacillales; Lactobacillaceae
GCF_001940525.2_ASM194052v2	WP_075776922.1	P	K	+	-	-	-	-	Bacteria; Proteobacteria; Alphaproteobacteria; Rhodobacterales; Rhodobacteraceae
GCF_001941445.1_ASM194144v1	WP_075726344.1	P	K	-	-	-	-	-	Bacteria; Terrabacteria group; Actinobacteria; Actinobacteria; Corynebacteriales; Corynebacteriaceae; Corynebacterium
GCF_001941465.1_ASM194146v1	WP_075729884.1	P	K	-	-	-	-	-	Bacteria; Terrabacteria group; Actinobacteria; Actinobacteria; Corynebacteriales; Corynebacteriaceae; Corynebacterium
GCF_001941485.1_ASM194148v1	WP_075663744.1	P	K	-	-	-	-	-	Bacteria; Terrabacteria group; Actinobacteria; Actinobacteria; Corynebacteriales; Corynebacteriaceae; Corynebacterium
GCF_001941505.1_ASM194150v1	WP_075691948.1	P	K	-	-	-	-	-	Bacteria; Terrabacteria group; Actinobacteria; Actinobacteria; Corynebacteriales; Corynebacteriaceae; Corynebacterium
GCF_001941565.1_ASM194156v1	WP_075733936.1	P	K	-	-	-	-	-	Bacteria; Terrabacteria group; Actinobacteria; Actinobacteria; Corynebacteriales; Corynebacteriaceae; Corynebacterium
GCF_001941805.1_ASM194180v1	WP_075696322.1	P	K	+	+	-	-	-	Bacteria; Proteobacteria; Gammaproteobacteria; Pseudomonadales; Moraxellaceae; Acinetobacter
GCF_001941825.1_ASM194182v1	WP_075792315.1	S	R	-	-	+	-	-	Bacteria; Proteobacteria; Betaproteobacteria; Burkholderiales; Oxalobacteraceae; Massilia
GCF_001941945.1_ASM194194v1	WP_075798358.1	P	K	+	-	-	-	-	Bacteria; Proteobacteria; Alphaproteobacteria; Rhodospirillales; Acetobacteraceae; Roseomonas
GCF_001945665.1_ASM194566v1	WP_075551924.1	T	R	-	-	-	-	-	Bacteria; Spirochaetes; Spirochaetia; Spirochaetales; Borreliaceae; Borreliella
GCF_001951155.1_ASM195115v1	WP_083645774.1	P	K	-	-	-	+	-	Bacteria; FCB group; Bacteroidetes/Chlorobi group; Bacteroidetes; Flavobacteriia; Flavobacteriales; Flavobacteriaceae; Gramella
GCF_001951175.1_ASM195117v1	WP_075887570.1	P	K	-	-	-	-	-	Bacteria; Terrabacteria group; Firmicutes; Bacilli; Lactobacillales; Lactobacillaceae; Lactobacillus
GCF_001953055.1_ASM195305v1	WP_075997283.1	P	K	-	-	-	-	-	Bacteria; Proteobacteria; Alphaproteobacteria; Rhizobiales; Phyllobacteriaceae; Nitratireductor
GCF_001953075.1_ASM195307v1	WP_075999868.1	P	K	+	+	-	-	-	Bacteria; Proteobacteria; Gammaproteobacteria; Cellvibrionales; Halieaceae
GCF_001953195.1_ASM195319v1	WP_004938364.1	P	K	+	+	-	-	-	Bacteria; Proteobacteria; Gammaproteobacteria; Pseudomonadales; Moraxellaceae
GCF_001956985.1_ASM195698v1	WP_076344996.1	P	N	-	-	-	+	-	Bacteria; PVC group; Planctomycetes; Planctomycetia; Planctomycetales; Isosphaeraceae; Paludisphaera
GCF_001971565.1_ASM197156v1	WP_004810438.1	P	K	+	+	-	-	-	Bacteria; Proteobacteria; Gammaproteobacteria; Pseudomonadales; Moraxellaceae
GCF_001971745.1_ASM197174v1	WP_076733165.1	P	K	-	-	-	+	-	Bacteria; FCB group; Bacteroidetes/Chlorobi group; Bacteroidetes; Flavobacteriia; Flavobacteriales; Flavobacteriaceae; Lacinutrix
GCF_001975025.1_ASM197502v1	WP_062779556.1	P	K	+	-	-	-	-	Bacteria; Terrabacteria group; Actinobacteria; Actinobacteria; Streptomycetales; Streptomycetaceae
GCF_001975225.1_ASM197522v1	WP_076769010.1	P	K	+	+	-	-	-	Bacteria; Proteobacteria; Gammaproteobacteria; Enterobacterales; Enterobacteriaceae; Kosakonia
GCF_001975665.1_ASM197566v1	WP_068358172.1	P	K	-	-	-	+	-	Bacteria; FCB group; Bacteroidetes/Chlorobi group; Bacteroidetes; Flavobacteriia; Flavobacteriales; Flavobacteriaceae; Polaribacter
GCF_001983935.1_ASM198393v1	WP_077028239.1	P	K	+	-	-	+	-	Bacteria; PVC group; Planctomycetes; Planctomycetia; Planctomycetales; Planctomycetaceae; Fuerstia
GCF_001983995.1_ASM198399v1	WP_084198216.1	P	K	-	+	-	-	-	Bacteria; Proteobacteria; Gammaproteobacteria; Cellvibrionales; Halieaceae; Halioglobus
GCF_001988955.1_ASM198895v1	WP_077133236.1	P	K	-	-	-	-	-	Bacteria; FCB group; Bacteroidetes/Chlorobi group; Bacteroidetes; Cytophagia; Cytophagales; Cytophagaceae; Spirosoma
GCF_001989575.1_ASM198957v1	WP_077140183.1	P	K	-	-	-	-	-	Bacteria; Terrabacteria group; Firmicutes; Bacilli; Bacillales; Staphylococcaceae; Auricoccus
GCF_001997295.1_ASM199729v1	WP_077341605.1	P	K	-	-	-	-	-	Bacteria; Terrabacteria group; Actinobacteria; Actinobacteria; Propionibacteriales; Propionibacteriaceae; Tessaracoccus
GCF_001998765.1_ASM199876v1	WP_008391359.1	P	K	-	-	-	-	-	Bacteria; Terrabacteria group; Firmicutes; Clostridia
GCF_001998865.1_ASM199886v1	WP_077352153.1	P	K	-	-	-	-	-	Bacteria; Terrabacteria group; Actinobacteria; Actinobacteria; Propionibacteriales; Propionibacteriaceae; Tessaracoccus
GCF_001999245.1_ASM199924v1	WP_006932138.1	P	K	-	-	-	-	-	Bacteria; Proteobacteria; Alphaproteobacteria; Rhodobacterales; Rhodobacteraceae
GCF_001999905.1_ASM199990v1	WP_077588900.1	P	K	-	-	-	-	-	Bacteria; Terrabacteria group; Firmicutes; Bacilli; Bacillales; Planococcaceae; Planococcus
GCF_001999945.1_ASM199994v1	WP_077407427.1	P	K	+	+	-	-	-	Bacteria; Proteobacteria; Gammaproteobacteria; Cellvibrionales; Microbulbiferaceae; Microbulbifer
GCF_001999985.1_ASM199998v1	WP_004088911.1	P	K	-	-	-	-	-	Bacteria; Proteobacteria; delta/epsilon subdivisions; Epsilonproteobacteria; Campylobacterales; Helicobacteraceae
GCF_002005145.1_ASM200514v1	WP_077713442.1	P	K	-	-	-	-	-	Bacteria; Terrabacteria group; Firmicutes; Clostridia; Clostridiales; Peptococcaceae; Desulfotomaculum
GCF_002005165.1_ASM200516v1	WP_077720439.1	P	K	-	-	-	-	-	Bacteria; Terrabacteria group; Firmicutes; Bacilli; Bacillales; Thermoactinomycetaceae; Novibacillus
GCF_002005305.1_ASM200530v1	WP_077751316.1	S	R	-	-	+	-	-	Bacteria; Proteobacteria; Gammaproteobacteria; Alteromonadales; Shewanellaceae; Shewanella
GCF_002005365.1_ASM200536v1	WP_077734778.1	S	R	-	-	+	-	-	Bacteria; Proteobacteria; Betaproteobacteria; Burkholderiales; Alcaligenaceae; Paenalcaligenes
GCF_002005405.1_ASM200540v1	WP_062471784.1	P	K	-	-	-	-	-	Bacteria; Terrabacteria group; Firmicutes; Bacilli; Lactobacillales; Carnobacteriaceae; Jeotgalibaca
GCF_002005445.1_ASM200544v1	WP_077813758.1	P	K	+	-	-	-	-	Bacteria; Proteobacteria; Alphaproteobacteria; Rhodospirillales; Acetobacteraceae; Acetobacter; Acetobacter subgen. Acetobacter
GCF_002005465.1_ASM200546v1	WP_077807959.1	P	K	+	-	-	-	-	Bacteria; Proteobacteria; Alphaproteobacteria; Rhodospirillales; Acetobacteraceae; Neoasaia
GCF_002006565.1_ASM200656v1	WP_025828607.1	P	K	+	-	-	-	-	Bacteria; Proteobacteria; Alphaproteobacteria; Rhodospirillales; Acetobacteraceae; Acetobacter
GCF_002007565.1_ASM200756v1	WP_077993998.1	P	K	-	-	-	-	-	Bacteria; Proteobacteria; Alphaproteobacteria; Rhizobiales; Bartonellaceae; Bartonella
GCF_002021925.1_ASM202192v1	WP_078440412.1	P	K	-	-	-	-	-	Bacteria; Proteobacteria; delta/epsilon subdivisions; Epsilonproteobacteria; Campylobacterales; Campylobacteraceae; Campylobacter
GCF_002025665.1_ASM202566v1	WP_079242903.1	P	K	-	-	-	+	-	Bacteria; FCB group; Bacteroidetes/Chlorobi group; Bacteroidetes; Flavobacteriia; Flavobacteriales; Flavobacteriaceae; Chryseobacterium
GCF_002025725.1_ASM202572v1	WP_079215514.1	S	R	-	-	+	-	-	Bacteria; Proteobacteria; Betaproteobacteria; Burkholderiales; Oxalobacteraceae; Herbaspirillum
GCF_002043005.1_ASM204300v1	WP_018063497.1	P	K	+	-	-	-	-	Bacteria; Proteobacteria; Alphaproteobacteria; Rhizobiales; Aurantimonadaceae; Martelella
GCF_002056725.1_ASM205672v1	WP_054065529.1	G	R	-	-	+	-	-	Bacteria; Proteobacteria; Betaproteobacteria; Burkholderiales; Comamonadaceae; Comamonas
GCF_002056795.1_ASM205679v1	WP_080059599.1	P	K	-	-	-	-	-	Bacteria; FCB group; Bacteroidetes/Chlorobi group; Bacteroidetes; Cytophagia; Cytophagales; Cytophagaceae; Spirosoma
GCF_002067135.1_ASM206713v1	WP_080237761.1	P	K	-	-	-	-	-	Bacteria; FCB group; Bacteroidetes/Chlorobi group; Bacteroidetes; Cytophagia; Cytophagales; Cytophagaceae; Spirosoma
GCF_002073635.2_ASM207363v2	WP_080620178.1	P	K	+	-	-	-	-	Bacteria; Proteobacteria; Alphaproteobacteria; Rhodobacterales; Rhodobacteraceae; Paracoccus
GCF_002073715.2_ASM207371v2	WP_002219406.1	G	R	-	-	+	-	-	Bacteria
GCF_002075285.2_ASM207528v2	WP_080805718.1	P	K	-	-	-	-	-	Bacteria; Terrabacteria group; Cyanobacteria/Melainabacteria group; Cyanobacteria; Synechococcales; Prochlorotrichaceae; Halomicronema
GCF_002075795.1_ASM207579v1	WP_055023990.1	S	R	-	-	+	-	-	Bacteria; Proteobacteria; Gammaproteobacteria; Alteromonadales; Shewanellaceae
GCF_002079945.1_ASM207994v1	WP_043557943.1	P	K	+	-	-	-	-	Bacteria; Proteobacteria; Alphaproteobacteria; Rhodospirillales
GCF_002082015.1_ASM208201v1	WP_083030711.1	P	K	-	-	-	-	-	Bacteria; Terrabacteria group; Firmicutes; Bacilli; Bacillales; Planococcaceae
GCF_002082605.1_ASM208260v1	WP_030290256.1	P	K	-	-	-	-	-	Bacteria; Terrabacteria group; Actinobacteria; Actinobacteria; Streptomycetales
GCF_002097535.1_ASM209753v1	WP_085029561.1	P	K	-	-	-	-	-	Bacteria; Terrabacteria group; Firmicutes; Bacilli; Bacillales; Bacillaceae; Halobacillus
GCF_002101395.1_ASM210139v1	WP_085069833.1	P	K	+	+	-	-	-	Bacteria; Proteobacteria; Gammaproteobacteria; Enterobacterales; Erwiniaceae; Pantoea
GCF_002105555.1_ASM210555v1	WP_085377380.1	P	K	+	-	-	-	-	Bacteria; Proteobacteria; Alphaproteobacteria; Rhodobacterales; Rhodobacteraceae; Paracoccus
GCF_002105755.1_ASM210575v1	WP_007774408.1	P	K	-	-	-	-	-	Bacteria; Terrabacteria group; Actinobacteria; Actinobacteria; Corynebacteriales; Mycobacteriaceae; Mycobacterium; Mycobacterium avium complex (MAC)
GCF_002117105.1_ASM211710v1	WP_085757663.1	P	K	-	+	-	-	-	Bacteria; Proteobacteria; Gammaproteobacteria; Cellvibrionales; Spongiibacteraceae; Oceanicoccus
GCF_002117405.1_ASM211740v1	WP_085773071.1	P	K	+	-	-	-	-	Bacteria; Proteobacteria; Alphaproteobacteria; Rhizobiales; Methylocystaceae; Methylocystis
GCF_002119665.1_ASM211966v1	WP_086078669.1	S	R	-	-	+	-	-	Bacteria; Proteobacteria; Betaproteobacteria; Burkholderiales; Alcaligenaceae; Bordetella
GCF_002119765.1_ASM211976v1	WP_086086794.1	P	K	-	-	-	-	-	Bacteria; Proteobacteria; Alphaproteobacteria; Rhizobiales; unclassified Rhizobiales; Pseudorhodoplanes
GCF_002142495.1_ASM214249v1	WP_086371030.1	P	K	-	-	-	-	-	Bacteria; Terrabacteria group; Cyanobacteria/Melainabacteria group; Cyanobacteria; Synechococcales; Leptolyngbyaceae; Leptolyngbya
GCF_002142615.1_ASM214261v1	WP_036764516.1	P	K	+	+	-	-	-	Bacteria; Proteobacteria; Gammaproteobacteria; Vibrionales; Vibrionaceae; Photobacterium
GCF_002157205.1_ASM215720v1	WP_086901187.1	P	K	+	+	-	-	-	Bacteria; Proteobacteria; Gammaproteobacteria; Oceanospirillales; Halomonadaceae; Kushneria
GCF_002157855.1_ASM215785v1	WP_010194744.1	P	K	-	-	-	-	-	Bacteria; Terrabacteria group; Firmicutes; Bacilli; Bacillales; Bacillaceae
GCF_002157895.1_ASM215789v1	WP_087037225.1	P	K	+	+	-	-	-	Bacteria; Proteobacteria; Gammaproteobacteria; Aeromonadales; Aeromonadaceae; Oceanisphaera
GCF_002162335.1_ASM216233v1	WP_087472015.1	P	K	-	-	-	-	-	Bacteria; Terrabacteria group; Actinobacteria; Actinobacteria; Micrococcales; Promicromonosporaceae; Cellulosimicrobium
GCF_002162375.1_ASM216237v1	WP_087460940.1	P	K	+	+	-	-	-	Bacteria; Proteobacteria; Gammaproteobacteria; Oceanospirillales; Oleiphilaceae; Oleiphilus
GCF_002163975.1_ASM216397v1	WP_087543345.1	P	K	-	-	-	+	-	Bacteria; Terrabacteria group; Cyanobacteria/Melainabacteria group; Cyanobacteria; Nostocales; unclassified Nostocales; unclassified Nostocales (miscellaneous)
GCF_002173495.1_ASM217349v1	WP_003325458.1	P	K	-	-	-	-	-	Bacteria; Terrabacteria group; Firmicutes; Bacilli; Bacillales; Bacillaceae; Bacillus
GCF_002189675.2_ASM218967v2	WP_030360477.1	P	K	-	-	-	-	-	Bacteria; Terrabacteria group; Actinobacteria; Actinobacteria; Streptomycetales; Streptomycetaceae
GCF_002192455.1_ASM219245v1	WP_087928976.1	P	K	-	-	-	-	-	Bacteria; Terrabacteria group; Actinobacteria; Actinobacteria; Streptomycetales; Streptomycetaceae; Streptomyces
GCF_002196515.1_ASM219651v1	WP_088134059.1	P	K	+	+	-	-	-	Bacteria; Proteobacteria; Gammaproteobacteria; Vibrionales; Vibrionaceae; Vibrio
GCF_002201795.1_ASM220179v1	WP_079558949.1	P	K	-	-	-	-	-	Bacteria; FCB group; Bacteroidetes/Chlorobi group; Bacteroidetes; Bacteroidia; Marinilabiliales
GCF_002208135.1_ASM220813v1	WP_010605834.1	P	K	+	+	-	-	-	Bacteria; Proteobacteria; Gammaproteobacteria; Alteromonadales; Pseudoalteromonadaceae
GCF_002208805.2_ASM220880v2	WP_002472500.1	P	K	-	-	-	-	-	Bacteria; Terrabacteria group; Firmicutes; Bacilli; Bacillales; Staphylococcaceae
GCF_002208825.2_ASM220882v2	WP_055754985.1	P	K	-	-	-	+	-	Bacteria; Proteobacteria; Alphaproteobacteria; Caulobacterales; Caulobacteraceae
GCF_002209185.2_ASM220918v2	WP_016422706.1	P	K	-	-	-	-	-	Bacteria; Terrabacteria group; Actinobacteria; Actinobacteria; Corynebacteriales; Corynebacteriaceae
GCF_002209385.1_ASM220938v1	WP_088620138.1	P	K	+	-	-	-	-	Bacteria; Proteobacteria; Gammaproteobacteria; Methylococcales; Methylococcaceae; Methylovulum
GCF_002211765.1_ASM221176v1	WP_053954303.1	P	K	+	+	-	-	-	Bacteria; Proteobacteria; Gammaproteobacteria; Alteromonadales; Idiomarinaceae
GCF_002211785.1_ASM221178v1	WP_088771654.1	P	K	+	-	-	-	-	Bacteria; Proteobacteria; Gammaproteobacteria; Thiotrichales; Francisellaceae; Francisella
GCF_002215135.1_ASM221513v1	WP_017419747.1	P	K	+	+	-	-	-	Bacteria; Proteobacteria; Gammaproteobacteria; Vibrionales; Vibrionaceae
GCF_002218245.1_ASM221824v1	WP_007962665.1	P	K	+	-	-	-	-	Bacteria; Proteobacteria; Gammaproteobacteria; Xanthomonadales; Xanthomonadaceae
GCF_002221525.1_ASM222152v1	WP_058546947.1	P	K	+	+	-	-	-	Bacteria; Proteobacteria; Gammaproteobacteria; Alteromonadales; Pseudoalteromonadaceae
GCF_002222615.2_ASM222261v2	WP_005678984.1	P	K	-	-	-	-	-	Bacteria; FCB group; Bacteroidetes/Chlorobi group; Bacteroidetes; Bacteroidia; Bacteroidales; Bacteroidaceae; Bacteroides
GCF_002222655.1_ASM222265v1	WP_089417128.1	G	R	-	-	+	-	-	Bacteria; Proteobacteria; Betaproteobacteria; Neisseriales; Neisseriaceae; Vitreoscilla
GCF_002224425.1_ASM222442v1	WP_004265504.1	P	K	-	-	-	-	-	Bacteria; Terrabacteria group; Firmicutes; Bacilli; Lactobacillales; Lactobacillaceae; Lactobacillus
GCF_002224565.1_ASM222456v1	WP_011374382.1	P	K	-	-	-	-	-	Bacteria; Terrabacteria group; Firmicutes; Bacilli; Lactobacillales; Lactobacillaceae; Lactobacillus
GCF_002224645.1_ASM222464v1	WP_089611367.1	P	K	-	-	-	-	-	Bacteria; Terrabacteria group; Firmicutes; Clostridia; Clostridiales; Peptococcaceae; Dehalobacterium
GCF_002234495.1_ASM223449v1	WP_031444160.1	P	K	-	-	-	+	-	Bacteria; FCB group; Bacteroidetes/Chlorobi group; Bacteroidetes; Flavobacteriia; Flavobacteriales; Flavobacteriaceae
GCF_002234535.1_ASM223453v1	WP_093941356.1	P	K	-	-	-	-	-	Bacteria; Terrabacteria group; Actinobacteria; Actinobacteria; Pseudonocardiales; Pseudonocardiaceae; Actinoalloteichus
GCF_002240035.1_ASM224003v1	WP_094092011.1	P	K	+	+	-	-	-	Bacteria; Proteobacteria; Gammaproteobacteria; Legionellales; Legionellaceae; Legionella
GCF_002240355.1_ASM224035v1	WP_091808078.1	P	K	-	-	-	-	-	Bacteria; Terrabacteria group; Actinobacteria; Actinobacteria; Pseudonocardiales; Pseudonocardiaceae; Prauserella
GCF_900070355.1_S2_rcS3_S1_rcS3	WP_058233922.1	P	K	-	-	-	-	-	Bacteria; Terrabacteria group; Actinobacteria; Actinobacteria; Micrococcales; Dermabacteraceae; Devriesea
GCF_900078695.1_H044680328	WP_025513409.1	S	R	-	-	+	-	-	Bacteria; Proteobacteria; Betaproteobacteria; Burkholderiales; Alcaligenaceae; Bordetella
GCF_900078775.1_ASM90007877v1	WP_073854603.1	P	K	-	-	-	-	-	Bacteria; Terrabacteria group; Actinobacteria; Actinobacteria; Corynebacteriales; Mycobacteriaceae
GCF_900086555.1_34903_D01	WP_004283334.1	G	R	-	-	+	-	-	Bacteria; Proteobacteria; Betaproteobacteria; Neisseriales; Neisseriaceae; Neisseria
GCF_900087055.1_31289_E01	WP_010863855.1	S	R	+	-	+	-	-	Bacteria; Proteobacteria; Gammaproteobacteria; Enterobacterales; unclassified Enterobacterales
GCF_900089455.2_OrrDiv2	WP_067751802.1	S	R	-	-	+	-	-	Bacteria; Proteobacteria; Betaproteobacteria; Burkholderiales; Alcaligenaceae; Orrella
GCF_900090215.1_TRABTM	WP_083172510.1	P	K	-	-	-	-	-	Bacteria; Proteobacteria; Gammaproteobacteria; Enterobacterales; Enterobacteriaceae; unclassified Enterobacteriaceae; ant, tsetse, mealybug, aphid, etc. endosymbionts; mealybug secondary endosymbionts
GCF_900093775.1_EVONIK_BGLY	WP_046131889.1	P	K	-	-	-	-	-	Bacteria; Terrabacteria group; Firmicutes; Bacilli; Bacillales; Bacillaceae
GCF_900095135.1_M36	WP_076928428.1	P	K	-	-	-	-	-	Bacteria; FCB group; Bacteroidetes/Chlorobi group; Bacteroidetes; Bacteroidia; Bacteroidales; Dysgonamonadaceae; Proteiniphilum
GCF_900097105.1_WK001	WP_067776872.1	P	R	-	-	-	-	-	Bacteria; PVC group; Verrucomicrobia; Verrucomicrobiae; Verrucomicrobiales; Akkermansiaceae; Akkermansia
GCF_900116045.1_DESPIGER	WP_072333111.1	P	K	-	-	-	-	-	Bacteria; Proteobacteria; delta/epsilon subdivisions; Deltaproteobacteria; Desulfovibrionales; Desulfovibrionaceae; Desulfovibrio
GCF_900116935.1_Chromosome	WP_010494369.1	P	K	-	-	-	-	-	Bacteria; Terrabacteria group; Firmicutes; Bacilli; Lactobacillales; Lactobacillaceae; Lactobacillus
GCF_900120165.1_PRJEB15652	WP_075573653.1	P	K	-	-	-	-	-	Bacteria; Terrabacteria group; Firmicutes; Tissierellia; unclassified Tissierellia; Ezakiella
GCF_900120345.1_PRJEB18024	WP_076778044.1	P	K	-	-	-	-	-	Bacteria; Terrabacteria group; Firmicutes; Clostridia; Clostridiales; Lachnospiraceae; Lachnoclostridium
GCF_900128415.1_PRJEB15655	WP_072537306.1	P	K	-	-	-	-	-	Bacteria; Terrabacteria group; Firmicutes; Tissierellia; Tissierellales; Peptoniphilaceae; Anaerococcus
GCF_900128595.1_BCipseudotaxifoliae_v1.0	WP_075474454.1	P	K	-	-	-	-	-	Bacteria; Proteobacteria; Gammaproteobacteria; Enterobacterales; Erwiniaceae; Buchnera
GCF_900128735.1_BCiconfinis_v1.0	WP_075431633.1	P	K	-	-	-	-	-	Bacteria; Proteobacteria; Gammaproteobacteria; Enterobacterales; Erwiniaceae; Buchnera
GCF_900169085.1_SWA-2	WP_080133192.1	P	K	-	-	-	-	-	Bacteria; PVC group; Chlamydiae; Chlamydiia; Chlamydiales; Chlamydiaceae; Chlamydia/Chlamydophila group; Chlamydia
GCF_900169485.1_PRJEB19959	WP_079535339.1	P	K	-	-	-	-	-	Bacteria; Terrabacteria group; Actinobacteria; Coriobacteriia; Eggerthellales; Eggerthellaceae; Phoenicibacter
GCF_900169565.1_NSJP_Ch1	WP_080887780.1	P	K	-	-	-	+	-	Bacteria; Nitrospirae; Nitrospira; Nitrospirales; Nitrospiraceae; Nitrospira
GCF_900170005.1_PRJEB19975	WP_080144600.1	P	K	-	-	-	-	-	Bacteria; Terrabacteria group; Actinobacteria; Coriobacteriia; Eggerthellales; Eggerthellaceae
GCF_900183405.1_ASM90018340v1	WP_057734267.1	P	K	-	-	-	-	-	Bacteria; Terrabacteria group; Firmicutes; Bacilli; Lactobacillales; Lactobacillaceae; Lactobacillus
GCF_900184705.1_CAMBI-1	WP_087862020.1	P	R	-	-	-	-	-	Bacteria; Terrabacteria group; Chloroflexi; Anaerolineae; Anaerolineales; Anaerolineaceae; Brevefilum
